# Supplementary material for: Molecular fossils from phytoplankton reveal secular Pco2 trend over the Phanerozoic
Source: PubMed Central journal article supplement — Sci Adv. 2018 Nov 28;4(11):eaat4556. doi: 10.1126/sciadv.aat4556 (PMC6261654; doi:10.1126/sciadv.aat4556), 2018-11-28

# SA-180612 - All Figures with Uncertainties

August 30, 2018

```
In [1]: %pylab inline
```

```
Populating the interactive namespace from numpy and matplotlib
```

```
In [2]: from SA_import import *
```

```
loading science.mplstyle
```

```
In [3]: foster_data_url="https://media.nature.com/original/nature-
assets/ncomms/2017/170404/ncomms14845/extref/ncomms14845-s3.xlsx"
foster_data_file='ncomms14845-s3.xlsx'

download(foster_data_url,foster_data_file,overwrite=False)
```

```
File ncomms14845-s3.xlsx exists...not overwriting
```

```
Out [3]: False
```

```
In [4]: errorbar_level=68
```

```
In [5]: saveit=True
```

```
In [6]: %%time
r=get_results()
```

```
CPU times: user 16.4 s, sys: 1.41 s, total: 17.8 s
```

```
Wall time: 17.9 s
```

## 0.1 Export the results

```
In [7]: num_data=len(r['Ma'])
```

```
In [8]: keys=['Ma', 'Ma_L', 'Ma_U', 'Ph', '', 'p', 'a', 'TC', 'TK', 'b', 'd', 'p', 'S', 'K0', 'b', 'f',
'dissolved_CO2', 'pCO2', 'current_oil', 'current_sedimentary', 'other_oil', 'other_sedimentary']
```

```
In [9]: for c in ['current_oil', 'current_sedimentary', 'other_oil', 'other_sedimentary']:
r[c]=zeros(num_data)
r[c][r['index_'+c]]=1
```

```
In [10]: data={}
new_keys=[]
for key in keys:
vals=r[key]
if vals.shape==(num_data,):
data[key]=vals
new_keys.append(key)
elif vals.shape[0]==num_data:
y=np.median(vals,axis=1)
yl=np.percentile(vals,(100-68)/2,axis=1)
yu=np.percentile(vals,100-(100-68)/2,axis=1)
data[key]=y
new_keys.append(key)
```

```

data[key+"_L1"]=y1
new_keys.append(key+"_L1")
data[key+"_U1"]=yu
new_keys.append(key+"_U1")

y1=np.percentile(vals,(100-95)/2,axis=1)
yu=np.percentile(vals,100-(100-95)/2,axis=1)
data[key+"_L2"]=y1
new_keys.append(key+"_L2")
data[key+"_U2"]=yu
new_keys.append(key+"_U2")

else:
    raise ValueError(key)

```

```
In [11]: data=pandas.DataFrame(data)
data=data[new_keys]
```

```
In [12]: data.head()
```

```
Out [12]:
```

|   | Ma  | Ma_L | Ma_U | Ph         | Ph_L1      | Ph_U1      | Ph_L2      | Ph_U2      | \ |
|---|-----|------|------|------------|------------|------------|------------|------------|---|
| 0 | 0.1 | 0.3  | 0.0  | -25.260302 | -25.599151 | -24.919090 | -25.734962 | -24.784824 |   |
| 1 | 0.5 | 1.0  | 0.0  | -24.376151 | -24.717525 | -24.040780 | -24.855048 | -23.905646 |   |
| 2 | 0.8 | 1.0  | 0.5  | -25.729731 | -26.071187 | -25.389393 | -26.204843 | -25.255360 |   |
| 3 | 1.8 | 2.0  | 1.5  | -24.102529 | -24.438695 | -23.761691 | -24.573481 | -23.625812 |   |
| 4 | 2.1 | 2.3  | 2.0  | -24.297099 | -24.641087 | -23.960279 | -24.775674 | -23.825200 |   |

|   |          | _L1      | ... | dissolved_CO2_U2 | pCO2       | \ |
|---|----------|----------|-----|------------------|------------|---|
| 0 | 3.491109 | 2.208745 | ... | 16.983969        | 282.539456 |   |
| 1 | 3.510182 | 2.226826 | ... | 15.548633        | 247.983095 |   |
| 2 | 3.513479 | 2.238523 | ... | 17.488370        | 282.916902 |   |
| 3 | 3.515069 | 2.230297 | ... | 15.993373        | 274.516389 |   |
| 4 | 3.513783 | 2.244820 | ... | 17.128712        | 306.787236 |   |

|   | pCO2_L1    | pCO2_U1    | pCO2_L2    | pCO2_U2    | current_oil | \ |
|---|------------|------------|------------|------------|-------------|---|
| 0 | 209.179136 | 372.472331 | 160.425607 | 469.673198 | 0.0         |   |
| 1 | 182.901011 | 326.618213 | 141.260622 | 408.583055 | 0.0         |   |
| 2 | 208.232668 | 373.983185 | 160.519823 | 473.774235 | 0.0         |   |
| 3 | 204.039045 | 361.177317 | 158.346190 | 454.054166 | 0.0         |   |
| 4 | 227.404406 | 404.300006 | 176.564796 | 509.383088 | 0.0         |   |

|   | current_sedimentary | other_oil | other_sedimentary |
|---|---------------------|-----------|-------------------|
| 0 | 1.0                 | 0.0       | 0.0               |
| 1 | 1.0                 | 0.0       | 0.0               |
| 2 | 1.0                 | 0.0       | 0.0               |
| 3 | 1.0                 | 0.0       | 0.0               |
| 4 | 1.0                 | 0.0       | 0.0               |

[5 rows x 78 columns]

```
In [13]: data.to_excel('SA_180612 export.xlsx')
```

## 0.2 Figure pCO<sub>2</sub> with age error bars and with the uncertainty and Foster Data

```
In [14]: color1='magenta'
#color2='#61cfe2' # cyan
color2='#FF9C33' # orange
#color2='y'
color2='#0EFFF0'
```

```

In [15]: figure(figsize=(13,10))

lwx=r['Foster']['lwx']
lwy=r['Foster']['lwy']
lw68=r['Foster']['lw68']
lw95=r['Foster']['lw95']
up68=r['Foster']['up68']
up95=r['Foster']['up95']

plot(lwx,lwy,'k-',lw=1)
fill_between(lwx, lw95, up95,
             alpha=0.5, edgecolor='#CCCCCC', facecolor='#CCCCCC')
fill_between(lwx, lw68, up68,
             alpha=0.5, edgecolor='#999999', facecolor='#999999')

#=====

x=array(r['Ma'])
xu=array(r['Ma_U'])
xl=array(r['Ma_L'])

idx_os_mo=r['index_other_oil']
idx_os_ms=r['index_other_sedimentary']
idx_cs_mo=r['index_current_oil']
idx_cs_ms=r['index_current_sedimentary']

y=np.median(r['pCO2'],axis=1)
yl=np.percentile(r['pCO2'],(100-errorbar_level)/2,axis=1)
yu=np.percentile(r['pCO2'],100-(100-errorbar_level)/2,axis=1)

xerr=array([x-xl,xu-x])
yerr=array([y-yl,yu-y])

alpha=0.8

plot(x[idx_os_mo],y[idx_os_mo],'o',ms=7,color=color1,markeredgecolor='k',markeredgewidth=1,
     label='Previously Published, Oil',alpha=alpha)
plot(x[idx_os_ms],y[idx_os_ms],'s',ms=7,color=color1,markeredgecolor='k',markeredgewidth=1,
     label='Previously Published, Sediment',alpha=alpha)
plot(x[idx_cs_mo],y[idx_cs_mo],'o',ms=7,color=color2,markeredgecolor='k',markeredgewidth=1,
     label='Current Study, Oil',alpha=alpha)
plot(x[idx_cs_ms],y[idx_cs_ms],'s',ms=7,color=color2,markeredgecolor='k',markeredgewidth=1,
     label='Current Study, Sediment',alpha=alpha)

errorbar(x,y,xerr=xerr,yerr=yerr,fmt='none',lw=1,zorder=0,ecolor='k',capsize=0)
ax=gca()
ax.invert_xaxis()
xlim([470,0])

xlabel('Age (Ma)')

ax.set_yscale('log')
h=ylabel('Reconstructed pCO2 ($\mu$atm)',rotation=270,va='bottom',labelpad=20)

ylim([90,3600])

ax.yaxis.set_label_position("right")
ax.yaxis.set_ticks_position("right")
ax.set_yticks([200,400,1000,2000])
ax.set_yticklabels([200,400,1000,2000])
grid('off')

x2,y2,xerr2,yerr2=x,y,xerr,yerr

add_time_periods(90,100,10)
LL=legend(loc='lower right',frameon=True,fontsize=14,
         bbox_to_anchor=(0.99, 0.025))
LL.get_frame().set_facecolor('#EEEEEE')

#=====

if saveit:

```

```
plt.savefig("../figures/Fig pCO2 with age error bars overlaid on the Foster.png",dpi=900,bbox_inches='tight')
```

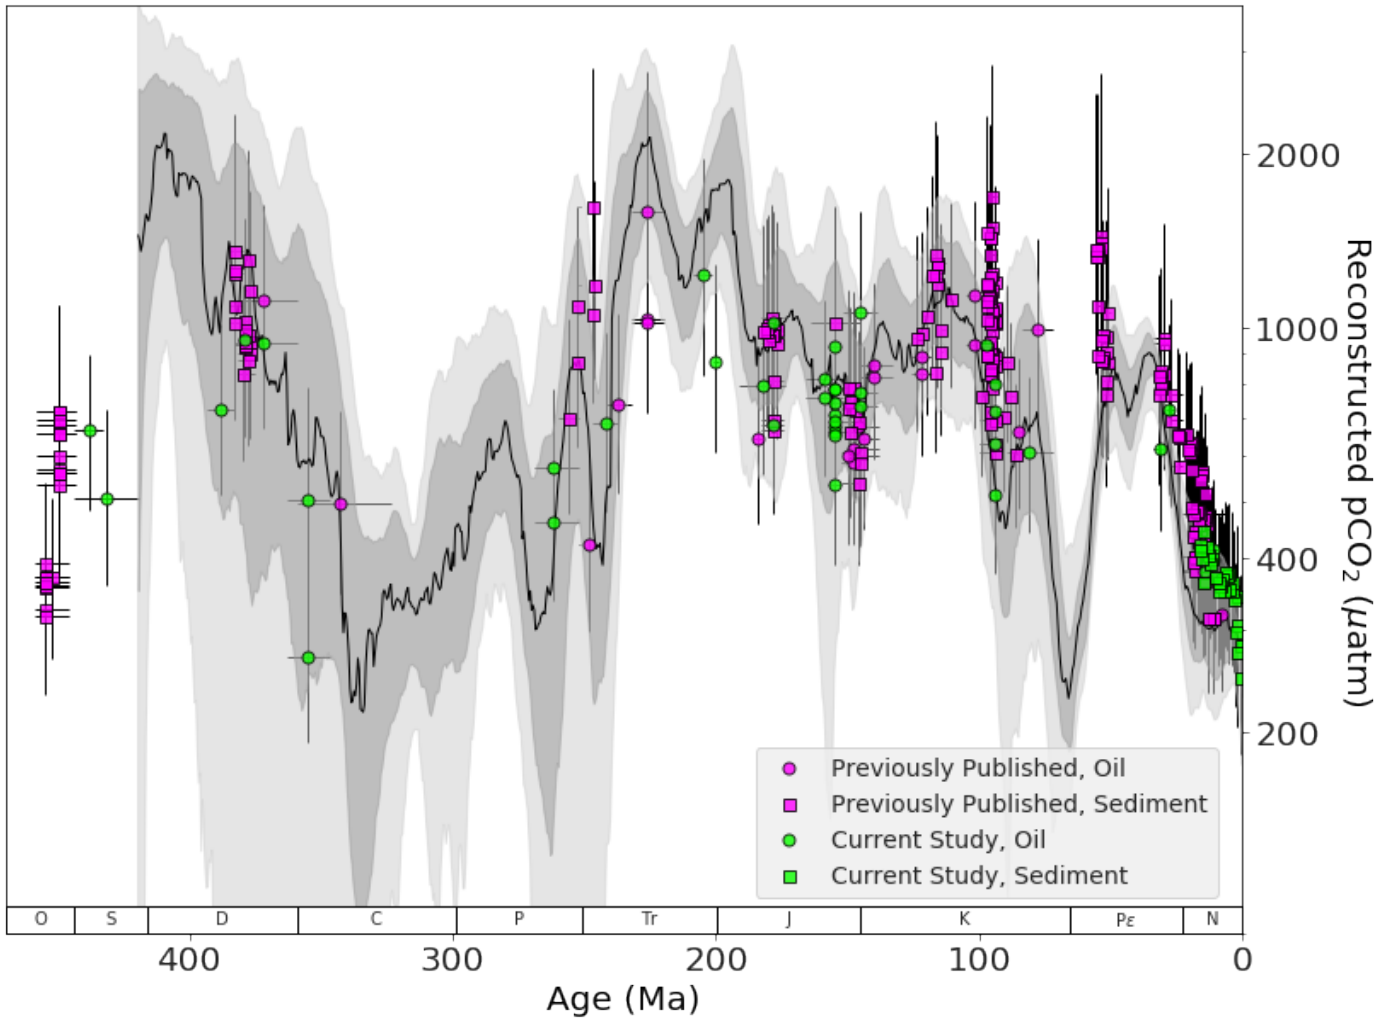

### 0.3 same as fig above, but with glaciation

```
In [16]: data_str="""
Start Stop z
456 428 60
380 345 70
335 305 61
305 284 32
284 256 67
168 165 70
162 160 70
138 135 70
120 110 70
33.5 27 62
27 23.5 66
23.5 23 76
23 14 62
14 0 40
"""
lines=data_str.strip().split('\n')
```

```
In [17]: center=[]
width=[]
height=[]
for line in lines[1:]:
    parts=line.split('\t')
```

```

center.append((float(parts[0])+float(parts[1]))/2)
width.append((float(parts[1])-float(parts[0])))
height.append(90-float(parts[2]))
bar(center,height,width,alpha=0.2)
gca().set_ylim([0,90])
yt=list(range(0,91,10))
gca().set_yticks(yt)
yt.reverse()
gca().set_yticklabels(yt)
gca().invert_yaxis()

```

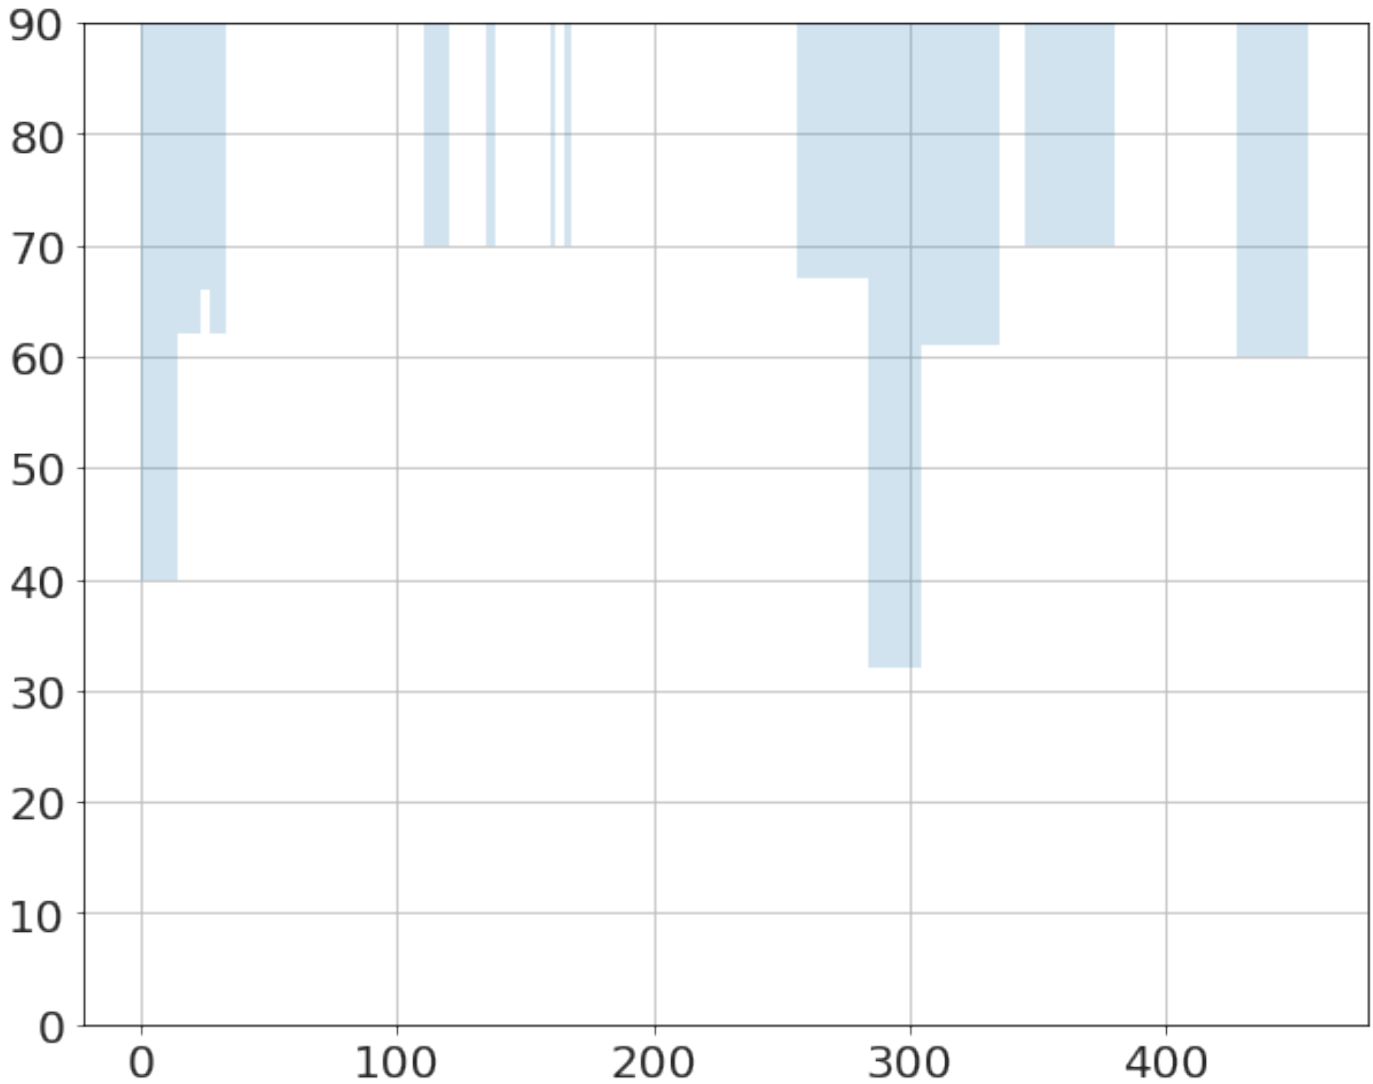

```
In [18]: figure(figsize=(13,10))
```

```

lwx=r['Foster']['lwx']
lwy=r['Foster']['lwy']
lw68=r['Foster']['lw68']
lw95=r['Foster']['lw95']
up68=r['Foster']['up68']
up95=r['Foster']['up95']

plot(lwx,lwy,'k-',lw=1)
fill_between(lwx, lw95, up95,
             alpha=0.5, edgecolor='#CCCCCC', facecolor='#CCCCCC')
fill_between(lwx, lw68, up68,
             alpha=0.5, edgecolor='#999999', facecolor='#999999')

```

```

#=====

x=array(r['Ma'])
xu=array(r['Ma_U'])
xl=array(r['Ma_L'])

idx_os_mo=r['index_other_oil']
idx_os_ms=r['index_other_sedimentary']
idx_cs_mo=r['index_current_oil']
idx_cs_ms=r['index_current_sedimentary']

y=np.median(r['pCO2'],axis=1)
yl=np.percentile(r['pCO2'],(100-errorbar_level)/2,axis=1)
yu=np.percentile(r['pCO2'],100-(100-errorbar_level)/2,axis=1)

xerr=array([x-xl,xu-x])
yerr=array([y-yl,yu-y])

alpha=0.8

ax=gca()
ax2=ax.twinx()
ax2.bar(center,height,width,alpha=0.2,label='glaciogenic latitude')
ax2.set_ylim([0,90])
yt=list(range(0,91,10))
ax2.set_yticks(yt)
yt.reverse()
ax2.set_yticklabels(yt)
ax2.invert_yaxis()
ax2.yaxis.set_label_position("left")
ax2.yaxis.set_ticks_position("left")
ax2.set_ylabel('Paleolatitude ( $^{\circ}$ ) of glaciogenic detritus')
ax2.grid('off')

ax.plot(x[idx_os_mo],y[idx_os_mo], 'o',ms=7,color=color1,markeredgecolor='k',markeredgewidth=1,
label='Previously Published, Oil',alpha=alpha)
ax.plot(x[idx_os_ms],y[idx_os_ms], 's',ms=7,color=color1,markeredgecolor='k',markeredgewidth=1,
label='Previously Published, Sediment',alpha=alpha)
ax.plot(x[idx_cs_mo],y[idx_cs_mo], 'o',ms=7,color=color2,markeredgecolor='k',markeredgewidth=1,
label='Current Study, Oil',alpha=alpha)
ax.plot(x[idx_cs_ms],y[idx_cs_ms], 's',ms=7,color=color2,markeredgecolor='k',markeredgewidth=1,
label='Current Study, Sediment',alpha=alpha)

ax.errorbar(x,y,xerr=xerr,yerr=yerr,fmt='none',lw=1,zorder=0,ecolor='k',capsize=0)
#ax=gca()
ax.invert_xaxis()
ax.set_xlim([470,0])

ax.set_xlabel('Age (Ma)')

ax.set_yscale('log')
h=ax.set_ylabel('Reconstructed pCO2 ( $\mu$ atm)',rotation=270,va='bottom',labelpad=20)

ax.set_ylim([90,3600])

ax.yaxis.set_label_position("right")
ax.yaxis.set_ticks_position("right")
ax.set_yticks([200,400,1000,2000])
ax.set_yticklabels([200,400,1000,2000])
ax.grid('off')

x2,y2,xerr2,yerr2=x,y,xerr,yerr

add_time_periods(90,100,10,ax=ax)
LL=ax.legend(loc='lower right',frameon=True,fontsize=14,
bbox_to_anchor=(0.99, 0.025))
LL.get_frame().set_facecolor('#EEEEEE')

#=====

```

```

if saveit:
    plt.savefig("../figures/Fig pCO2 with age error bars overlaid on the Foster with
glaciation.png",dpi=900,bbox_inches='tight')

```

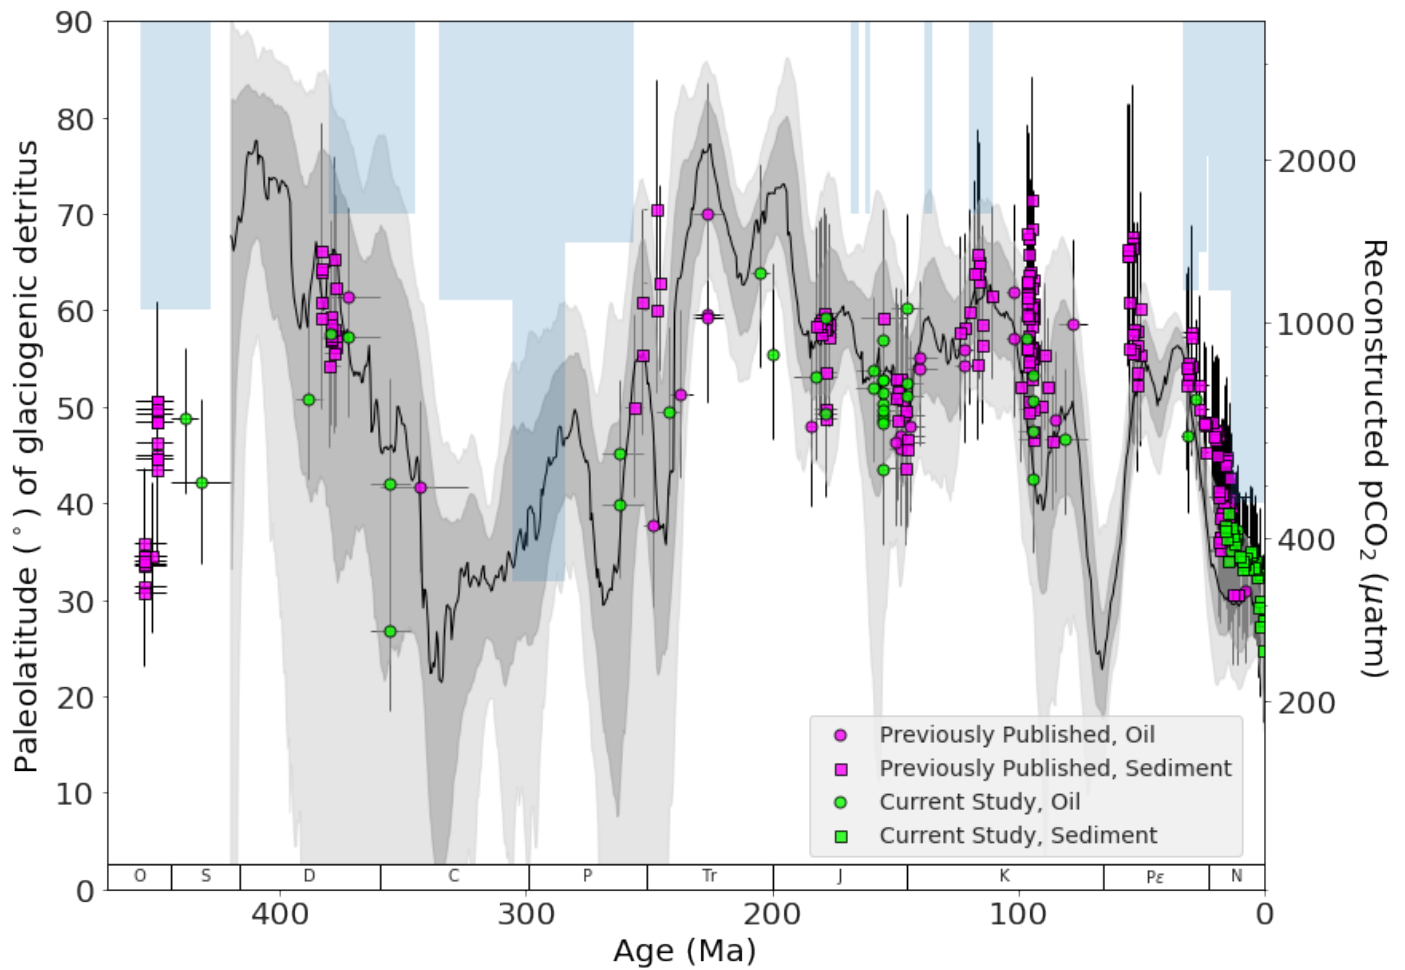

## 1 Figure $^{13}\text{C}$ of phytane with age error bars

```
In [19]: figure(figsize=(13,10))
```

```

x=array(r['Ma'])
xu=array(r['Ma_U'])
xl=array(r['Ma_L'])

idx_os_mo=r['index_other_oil']
idx_os_ms=r['index_other_sedimentary']
idx_cs_mo=r['index_current_oil']
idx_cs_ms=r['index_current_sedimentary']

y=np.median(r['Ph'],axis=1)
yl=np.percentile(r['Ph'],(100-errorbar_level)/2,axis=1)
yu=np.percentile(r['Ph'],100-(100-errorbar_level)/2,axis=1)

xerr=array([x-xl,xu-x])
yerr=array([y-yl,yu-y])

alpha=0.8
plot(x[idx_os_mo],y[idx_os_mo], 'o',ms=7,color=color1,markeredgecolor='k',markeredgewidth=1,

```

```

label='Previously Published, Oil',alpha=alpha)
plot(x[idx_os_ms],y[idx_os_ms],'s',ms=7,color=color1,markeredgecolor='k',markeredgewidth=1,
label='Previously Published, Sediment',alpha=alpha)
plot(x[idx_cs_mo],y[idx_cs_mo],'o',ms=7,color=color2,markeredgecolor='k',markeredgewidth=1,
label='Current Study, Oil',alpha=alpha)
plot(x[idx_cs_ms],y[idx_cs_ms],'s',ms=7,color=color2,markeredgecolor='k',markeredgewidth=1,
label='Current Study, Sediment',alpha=alpha)

errorbar(x,y,xerr=xerr,fmt='none',lw=1,zorder=0,ecolor='k',capsize=0)
ax=gca()
ax.invert_xaxis()
xlim([470,0])
xlabel('Age (Ma)')

ax.yaxis.set_label_position("right")
ax.yaxis.set_ticks_position("right")

h=ylabel(r'\delta^{13}C of phytane (\%_{oo}\%_{oo})',rotation=270,va='bottom',labelpad=20)
#h=ylabel(r'\delta^{13}C of Phytane (\%_{\%}/_{\%}\%_{\%})',rotation=270,va='bottom',labelpad=20)

grid('off')

add_time_periods()
LL=legend(loc='upper left',frameon=True,fontsize=14)
LL.get_frame().set_facecolor('#EEEEEE')

#=====
if saveit:
plt.savefig("../figures/Fig 13C of phytane with age error bars.png",dpi=900,bbox_inches='tight')

```

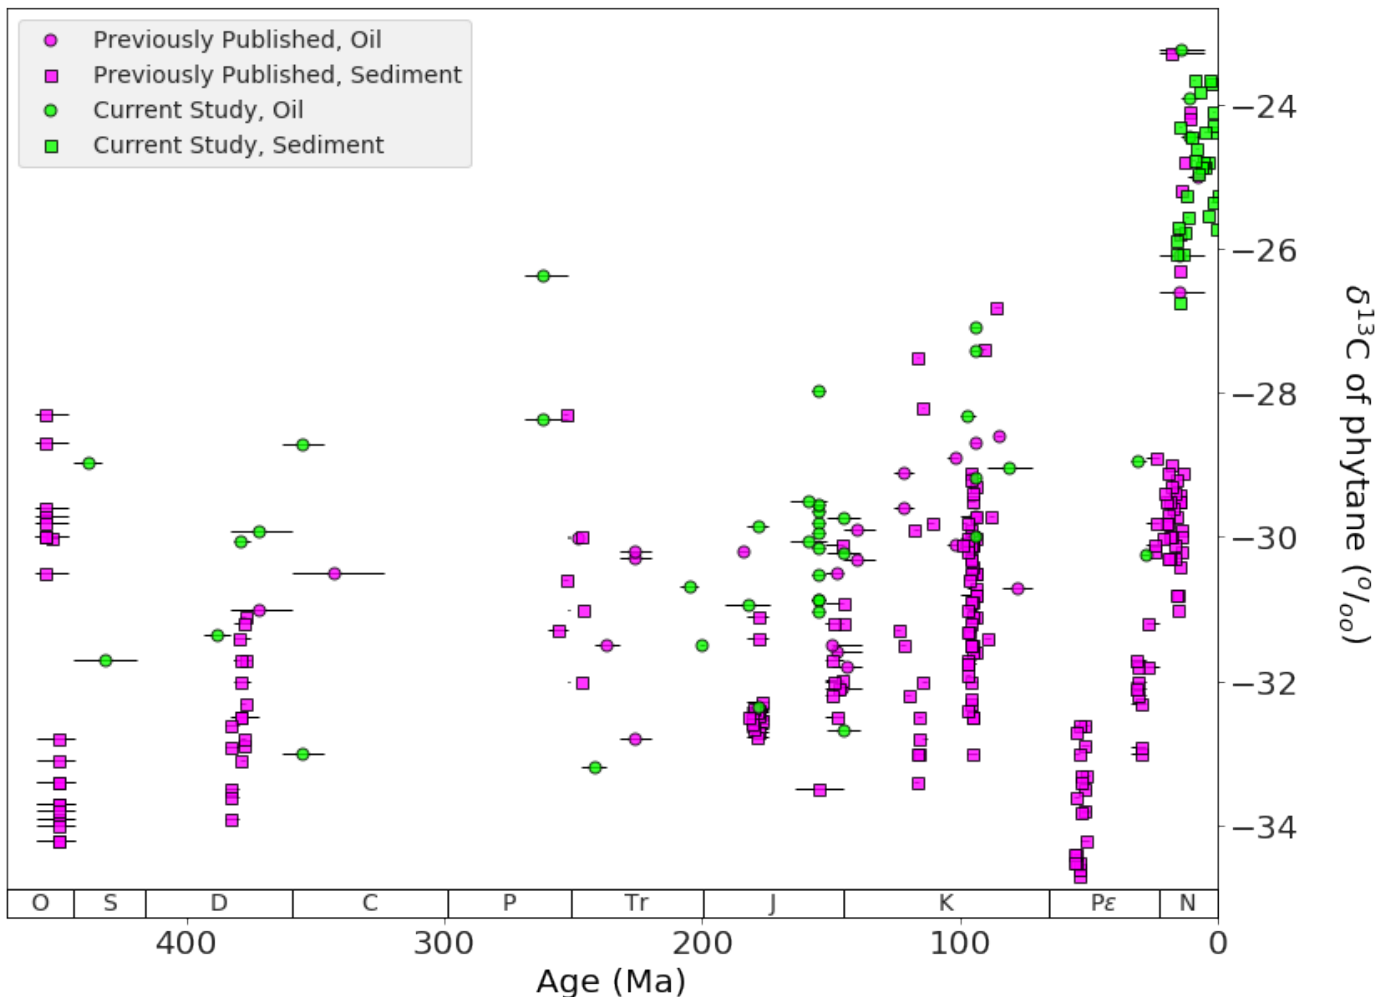



## 2 Figure p of phytane with age error bars

```
In [20]: figure(figsize=(13,10))
```

```
x=array(r['Ma'])
xu=array(r['Ma_U'])
xl=array(r['Ma_L'])

idx_os_mo=r['index_other_oil']
idx_os_ms=r['index_other_sedimentary']
idx_cs_mo=r['index_current_oil']
idx_cs_ms=r['index_current_sedimentary']

y=np.median(r['p'],axis=1)
yl=np.percentile(r['p'],(100-errorbar_level)/2,axis=1)
yu=np.percentile(r['p'],100-(100-errorbar_level)/2,axis=1)

xerr=array([x-xl,xu-x])
yerr=array([y-yl,yu-y])

alpha=0.8
plot(x[idx_os_mo],y[idx_os_mo],'o',ms=7,color=color1,markeredgecolor='k',markeredgewidth=1,
     label='Previously Published, Oil',alpha=alpha)
plot(x[idx_os_ms],y[idx_os_ms],'s',ms=7,color=color1,markeredgecolor='k',markeredgewidth=1,
     label='Previously Published, Sediment',alpha=alpha)
plot(x[idx_cs_mo],y[idx_cs_mo],'o',ms=7,color=color2,markeredgecolor='k',markeredgewidth=1,
     label='Current Study, Oil',alpha=alpha)
plot(x[idx_cs_ms],y[idx_cs_ms],'s',ms=7,color=color2,markeredgecolor='k',markeredgewidth=1,
     label='Current Study, Sediment',alpha=alpha)

errorbar(x,y,xerr=xerr,yerr=yerr,fmt='none',lw=1,zorder=0,ecolor='k',capsize=0)
ax=gca()
ax.invert_xaxis()
xlim([470,0])
xlabel('Age (Ma)')

ax.yaxis.set_label_position("right")
ax.yaxis.set_ticks_position("right")

h=ylabel(r'$\epsilon_p$ calculated from phytane ( $\frac{o}{o}$ )',rotation=270,va='bottom',labelpad=20)
#h=ylabel(r'$\delta^{13}C$ of Phytane ( $\frac{\%}{\%}$ )',rotation=270,va='bottom',labelpad=20)

grid('off')

add_time_periods()
LL=legend(loc='lower left',frameon=True,fontsize=14,bbox_to_anchor=(0,.03))
LL.get_frame().set_facecolor('#EEEEEE')

#=====

if saveit:
    plt.savefig("../figures/Fig p of phytane with age error bars and uncertainty.png",dpi=900,bbox_inches='tight')
```

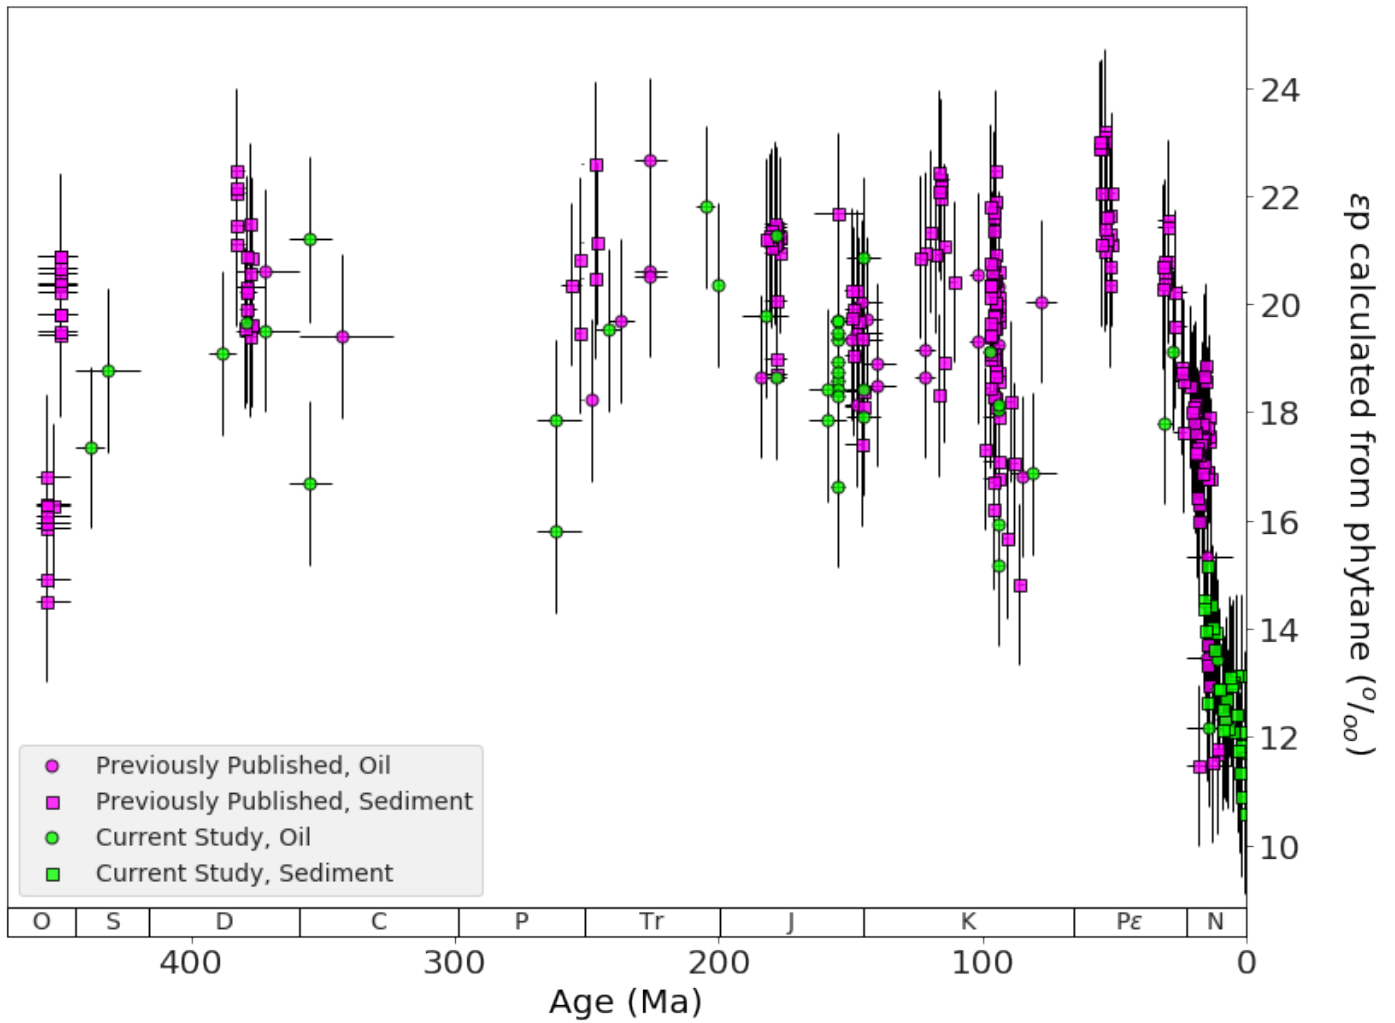

### 3 Figure pCO<sub>2</sub> reconstruction with Foster et al., zoomed in for specific time periods:

A: Phanerozoic (what we currently have)

B: Cretaceous to today

C: Paleogene to today

D: Neogene to today

In [21]: `figure(figsize=(13,26))`

```
lwx=r['Foster']['lwx']
lwy=r['Foster']['lwy']
lw68=r['Foster']['lw68']
lw95=r['Foster']['lw95']
up68=r['Foster']['up68']
up95=r['Foster']['up95']
```

```
#=====
```

```
x=array(r['Ma'])
xu=array(r['Ma_U'])
xl=array(r['Ma_L'])
```

```
idx_os_mo=r['index_other_oil']
idx_os_ms=r['index_other_sedimentary']
```

```

idx_cs_mo=r['index_current_oil']
idx_cs_ms=r['index_current_sedimentary']

y=np.median(r['pCO2'],axis=1)
yl=np.percentile(r['pCO2'],(100-errorbar_level)/2,axis=1)
yu=np.percentile(r['pCO2'],100-(100-errorbar_level)/2,axis=1)

xerr=array([x-xl,xu-x])
yerr=array([y-yl,yu-y])

def plotit(xl=[470,0],frac=0.03):
    plot(lwx,lwy,'k-',lw=1)
    fill_between(lwx, lw95, up95,
        alpha=0.5, edgecolor='#CCCCCC', facecolor='#CCCCCC')
    fill_between(lwx, lw68, up68,
        alpha=0.5, edgecolor='#999999', facecolor='#999999')

    alpha=0.8

    plot(x[idx_os_mo],y[idx_os_mo], 'o',ms=7,color=color1,markeredgecolor='k',markeredgewidth=1,
        label='Previously Published, Oil',alpha=alpha)
    plot(x[idx_os_ms],y[idx_os_ms], 's',ms=7,color=color1,markeredgecolor='k',markeredgewidth=1,
        label='Previously Published, Sediment',alpha=alpha)
    plot(x[idx_cs_mo],y[idx_cs_mo], 'o',ms=7,color=color2,markeredgecolor='k',markeredgewidth=1,
        label='Current Study, Oil',alpha=alpha)
    plot(x[idx_cs_ms],y[idx_cs_ms], 's',ms=7,color=color2,markeredgecolor='k',markeredgewidth=1,
        label='Current Study, Sediment',alpha=alpha)

    errorbar(x,y,xerr=xerr,yerr=yerr,fmt='none',lw=1,zorder=0,ecolor='k',capsize=0)
    ax=gca()
    ax.invert_xaxis()
    xlim(xl)

    xlabel('Age (Ma)')

    ax.set_yscale('log')
    h=ylabel('Reconstructed pCO2 ($\mu$atm)',rotation=270,va='bottom',labelpad=20)

    ylim([90,3600])

    ax.yaxis.set_label_position("right")
    ax.yaxis.set_ticks_position("right")
    ax.set_yticks([200,400,1000,2000])
    ax.set_yticklabels([200,400,1000,2000])
    grid('off')

    x2,y2,xerr2,yerr2=x,y,xerr,yerr

    add_time_periods(frac=frac)

#=====
def letter_label(letter):
    text(0.01, 0.85,letter,fontsize=30,
        horizontalalignment='left',
        verticalalignment='bottom',
        transform = gca().transAxes)

subplot(4,1,1)
# Neogene to today
plotit([22.99,0],frac=0.01)
xlabel('')
letter_label('A')

subplot(4,1,2)
# Paleogene to today
plotit([65.49,0],frac=0.01)
xlabel('')
letter_label('B')

```

```
subplot(4,1,3)
# Cretaceous to today
plotit([145.49,0],frac=0.01)
xlabel('')
letter_label('C')

subplot(4,1,4)
plotit(frac=0.01)
# LL=legend(loc='upper left',frameon=True,fontsize=14)
# LL.get_frame().set_facecolor('#EEEEEE')
letter_label('D')

if saveit:
    plt.savefig("../figures/Fig pCO2 with Foster zoomed in for specific time periods.png",dpi=900,bbox_inches='tight')
```

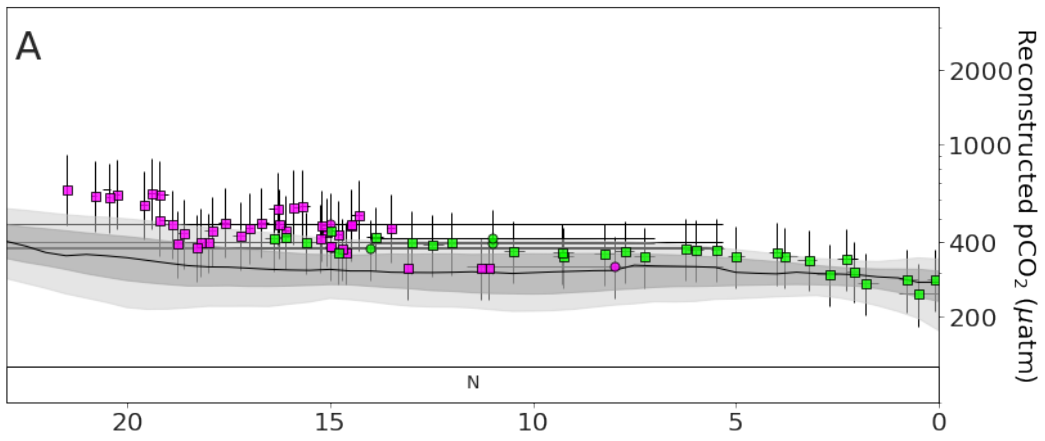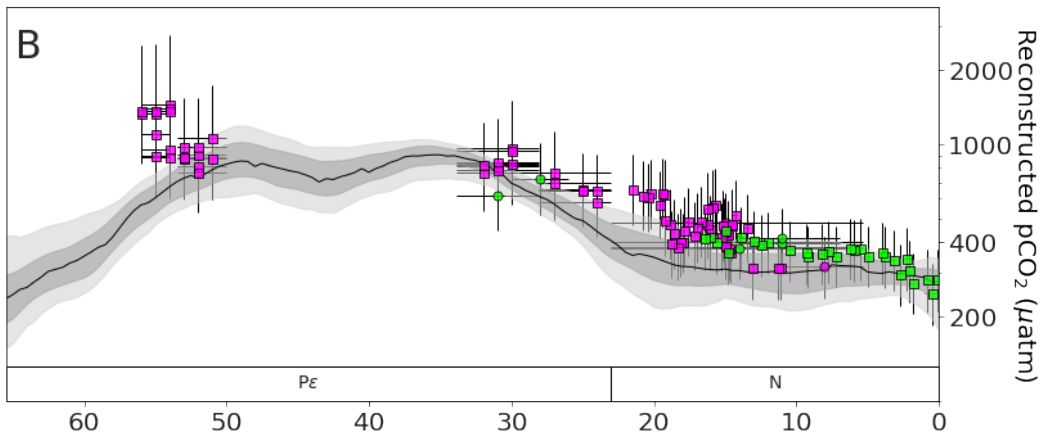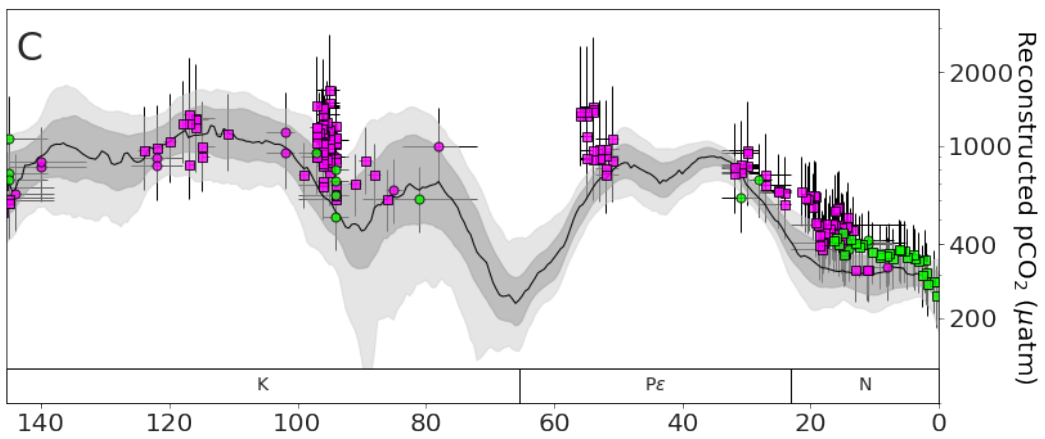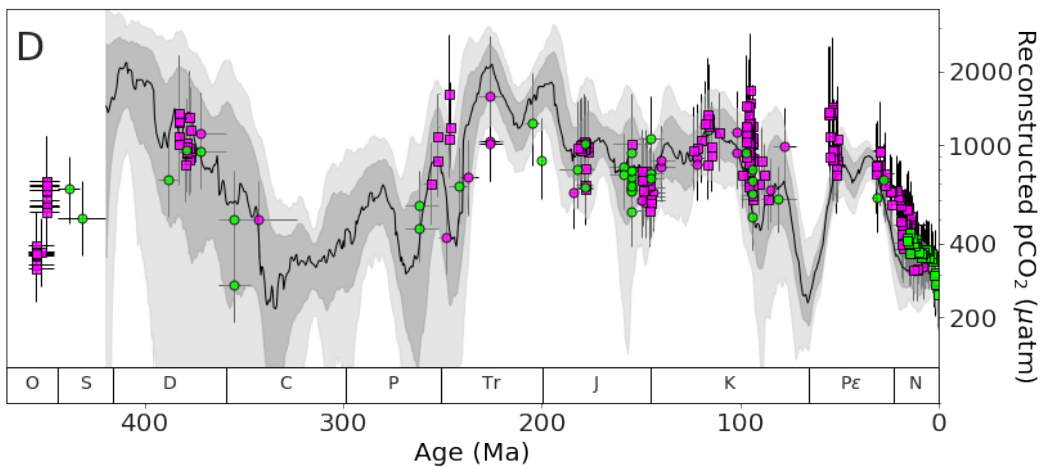

## 4 Fig S3a. p of phytane breakdown on the uncertainty associated with each individual parameter

### 4.0.1 (everything kept as is, with the exception of the one parameter being highlighted).

```
In [22]: %%time
r_baseline=get_results(fix_parameters=['Ph','','a','TC'])
r_Ph=get_results(fix_parameters=['','a','TC'])
r_=get_results(fix_parameters=['Ph','a','TC'])
r_a=get_results(fix_parameters=['Ph','','TC'])
r_TC=get_results(fix_parameters=['Ph','','a'])
```

CPU times: user 1min 17s, sys: 8.05 s, total: 1min 25s

Wall time: 1min 26s

```
In [23]: figure(figsize=(13,20))
```

```
def plotit(r,r_baseline,frac=0.03):
    x=array(r['Ma'])
    xu=array(r['Ma_U'])
    xl=array(r['Ma_L'])

    idx_os_mo=r['index_other_oil']
    idx_os_ms=r['index_other_sedimentary']
    idx_cs_mo=r['index_current_oil']
    idx_cs_ms=r['index_current_sedimentary']

    val=(r['p']-r_baseline['p'])/r_baseline['p']*100
    y=np.median(val,axis=1)
    yl=np.percentile(val,(100-errorbar_level)/2,axis=1)
    yu=np.percentile(val,100-(100-errorbar_level)/2,axis=1)

    xerr=array([x-xl,xu-x])
    yerr=array([y-yl,yu-y])

    alpha=0.5
    plot(x[idx_os_mo],y[idx_os_mo],'o',ms=7,color=color1,markeredgecolor='k',markeredgewidth=1,
         label='Previously Published, Oil',alpha=alpha)
    plot(x[idx_os_ms],y[idx_os_ms],'s',ms=7,color=color1,markeredgecolor='k',markeredgewidth=1,
         label='Previously Published, Sediment',alpha=alpha)
    plot(x[idx_cs_mo],y[idx_cs_mo],'o',ms=7,color=color2,markeredgecolor='k',markeredgewidth=1,
         label='Current Study, Oil',alpha=alpha)
    plot(x[idx_cs_ms],y[idx_cs_ms],'s',ms=7,color=color2,markeredgecolor='k',markeredgewidth=1,
         label='Current Study, Sediment',alpha=alpha)

    errorbar(x,y,xerr=xerr,yerr=yerr,fmt='none',lw=1,zorder=0,ecolor='k',capsize=0)
    ax=gca()
    ax.invert_xaxis()
    xlim([470,0])
    xlabel('Age (Ma)')

    ax.yaxis.set_label_position("right")
    ax.yaxis.set_ticks_position("right")

    #h=ylabel(r'% change in p ($^{o}/_{oo}$)',rotation=270,va='bottom',labelpad=20)
    #h=ylabel(r'$\delta^{13}C$ of Phytane ($^{\%}/_{\%}$)',rotation=270,va='bottom',labelpad=20)

    grid('off')

    add_time_periods(frac=frac)

    #=====
```

```

subplot(4,1,1)
plotit(r_Ph,r_baseline,frac=0)
title('13C of phytane  $\delta$  0.5')
gca().set_xticklabels([])
gca().set_xlabel('')
gca().spines['left'].set_visible(False)
gca().spines['top'].set_visible(False)

subplot(4,1,2)
plotit(r_,r_baseline,frac=0)
title('Offset between biomarker and biomass ()  $\delta$  1.3')
gca().set_xticklabels([])
gca().set_xlabel('')
gca().spines['left'].set_visible(False)
gca().spines['top'].set_visible(False)

subplot(4,1,3)
plotit(r_a,r_baseline,frac=0)
title('13C of planktonic foraminifera  $\delta$  0.2/0.4')
gca().set_xticklabels([])
gca().set_xlabel('')
gca().spines['left'].set_visible(False)
gca().spines['top'].set_visible(False)

subplot(4,1,4)
plotit(r_TC,r_baseline,frac=0.07)
title('Temperature  $\delta$  4°C')
gca().spines['left'].set_visible(False)
gca().spines['top'].set_visible(False)

gcf().text(0.99, 0.5, r'% change in  $\epsilon_p$ ', fontsize=30,
          ha='center', va='center', rotation=270)

if saveit:
    plt.savefig("../figures/Fig percent change p uncertainty associated with each
parameter.png",dpi=900,bbbox_inches='tight')

```

$\delta^{13}\text{C}$  of phytane  $\pm 0.5\text{‰}$

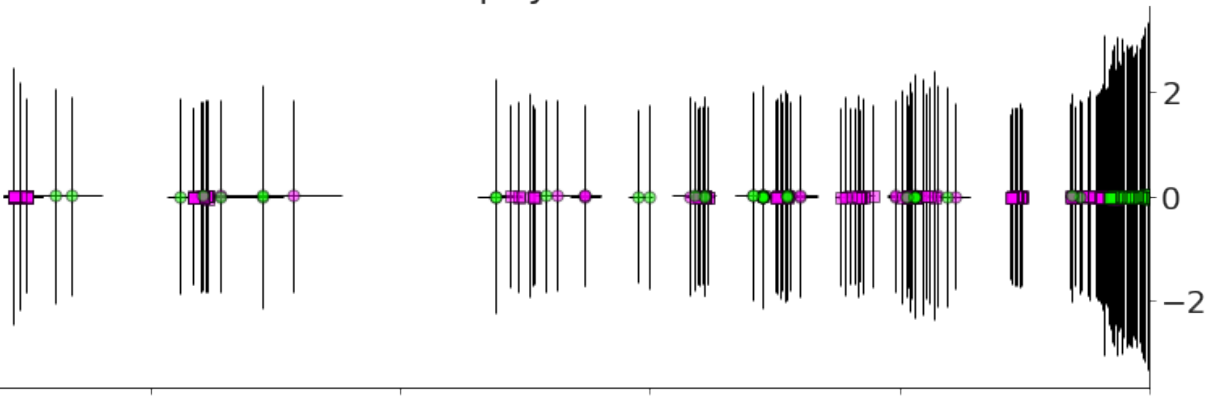

Offset between biomarker and biomass ( $\Delta\delta$ )  $\pm 1.3\text{‰}$

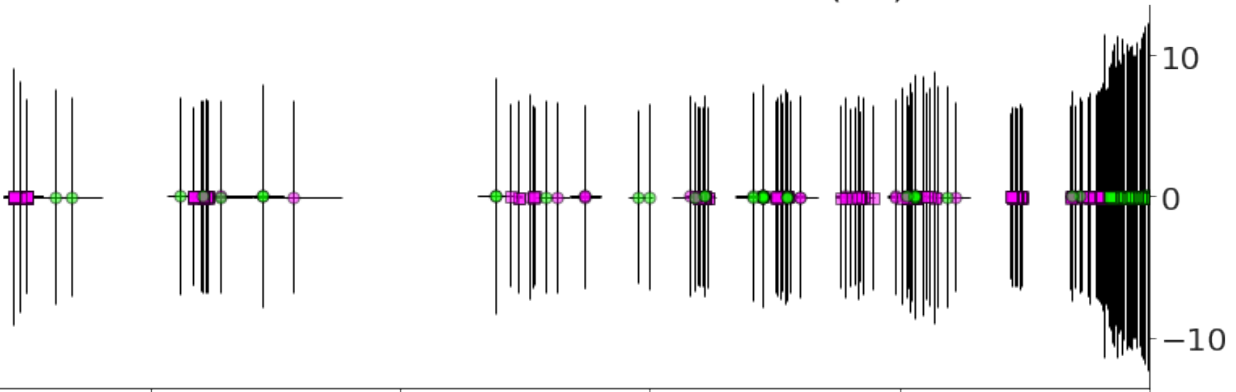

$\delta^{13}\text{C}$  of planktonic foraminifera  $\pm 0.2\text{‰}/0.4\text{‰}$

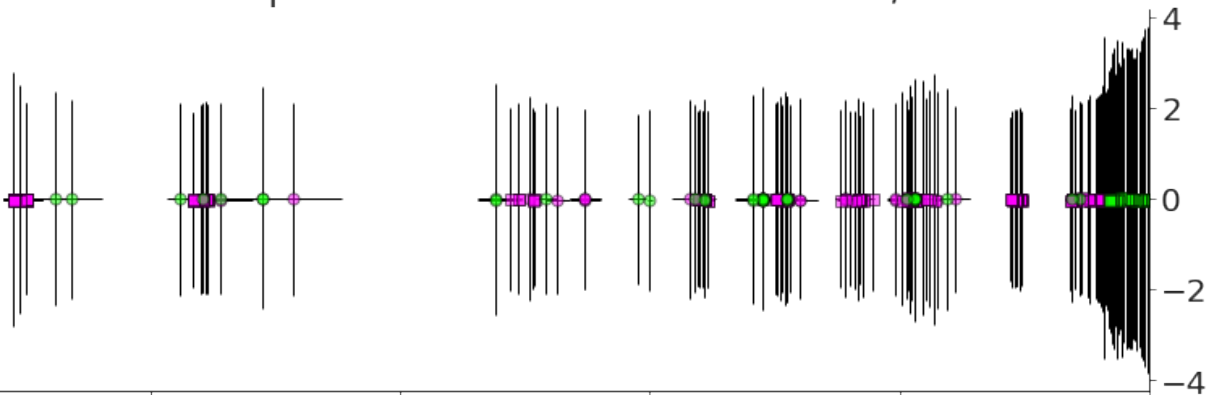

Temperature  $\pm 4^\circ\text{C}$

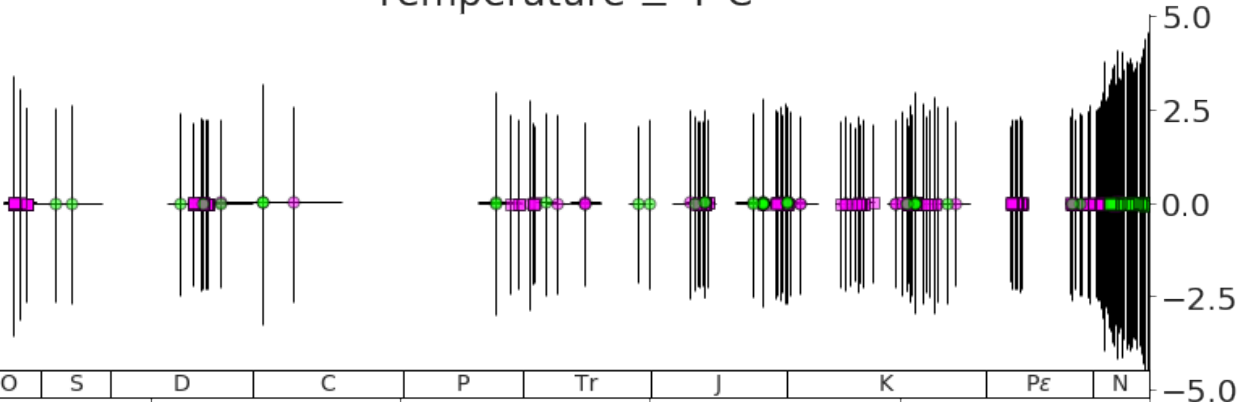

% change in  $\epsilon_{\text{P}}$

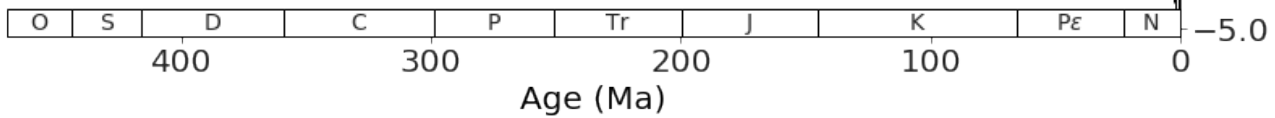



## 4.0.2 same as above but no titles

```
In [24]: figure(figsize=(13,20))
```

```
def plotit(r,r_baseline,frac=0.03):
    x=array(r['Ma'])
    xu=array(r['Ma_U'])
    xl=array(r['Ma_L'])

    idx_os_mo=r['index_other_oil']
    idx_os_ms=r['index_other_sedimentary']
    idx_cs_mo=r['index_current_oil']
    idx_cs_ms=r['index_current_sedimentary']

    val=(r['p']-r_baseline['p'])/r_baseline['p']*100
    y=np.median(val,axis=1)
    yl=np.percentile(val,(100-errorbar_level)/2,axis=1)
    yu=np.percentile(val,100-(100-errorbar_level)/2,axis=1)

    xerr=array([x-xl,xu-x])
    yerr=array([y-yl,yu-y])

    alpha=0.5
    plot(x[idx_os_mo],y[idx_os_mo], 'o',ms=7,color=color1,markeredgecolor='k',markeredgewidth=1,
         label='Previously Published, Oil',alpha=alpha)
    plot(x[idx_os_ms],y[idx_os_ms], 's',ms=7,color=color1,markeredgecolor='k',markeredgewidth=1,
         label='Previously Published, Sediment',alpha=alpha)
    plot(x[idx_cs_mo],y[idx_cs_mo], 'o',ms=7,color=color2,markeredgecolor='k',markeredgewidth=1,
         label='Current Study, Oil',alpha=alpha)
    plot(x[idx_cs_ms],y[idx_cs_ms], 's',ms=7,color=color2,markeredgecolor='k',markeredgewidth=1,
         label='Current Study, Sediment',alpha=alpha)

    errorbar(x,y,xerr=xerr,yerr=yerr,fmt='none',lw=1,zorder=0,ecolor='k',capsize=0)
    ax=gca()
    ax.invert_xaxis()
    xlim([470,0])
    xlabel('Age (Ma)')

    ax.yaxis.set_label_position("right")
    ax.yaxis.set_ticks_position("right")

    #h=ylabel(r'% change in p ($^{o}/_{oo}$)',rotation=270,va='bottom',labelpad=20)
    #h=ylabel(r'$\delta^{13}C$ of Phytane ($_{\%}/_{\%}$)',rotation=270,va='bottom',labelpad=20)

    grid('off')

    add_time_periods(frac=frac)

    #=====

    subplot(4,1,1)
    plotit(r_Ph,r_baseline,frac=0)
    #title('13C of phytane s 0.5')
    gca().set_xticklabels([])
    gca().set_xlabel('')
    gca().spines['left'].set_visible(False)
    gca().spines['top'].set_visible(False)

    subplot(4,1,2)
    plotit(r_,r_baseline,frac=0)
    #title('Offset between biomarker and biomass () s 1.3')
    gca().set_xticklabels([])
    gca().set_xlabel('')
    gca().spines['left'].set_visible(False)
    gca().spines['top'].set_visible(False)
```

```

subplot(4,1,3)
plotit(r_a,r_baseline,frac=0)
#title('13C of planktonic foraminifera  $\delta$  0.2')
gca().set_xticklabels([])
gca().set_xlabel('')
gca().spines['left'].set_visible(False)
gca().spines['top'].set_visible(False)

subplot(4,1,4)
plotit(r_TC,r_baseline,frac=0.07)
#title('Temperature  $\delta$  4ŽC')
gca().spines['left'].set_visible(False)
gca().spines['top'].set_visible(False)

gcf().text(0.99, 0.5, r'% change in  $\epsilon_p$ ', fontsize=30,
          ha='center', va='center', rotation=270)

if saveit:
    plt.savefig("../figures/Fig no titles percent change p uncertainty associated with each
parameter.png",dpi=900,bbox_inches='tight')

```

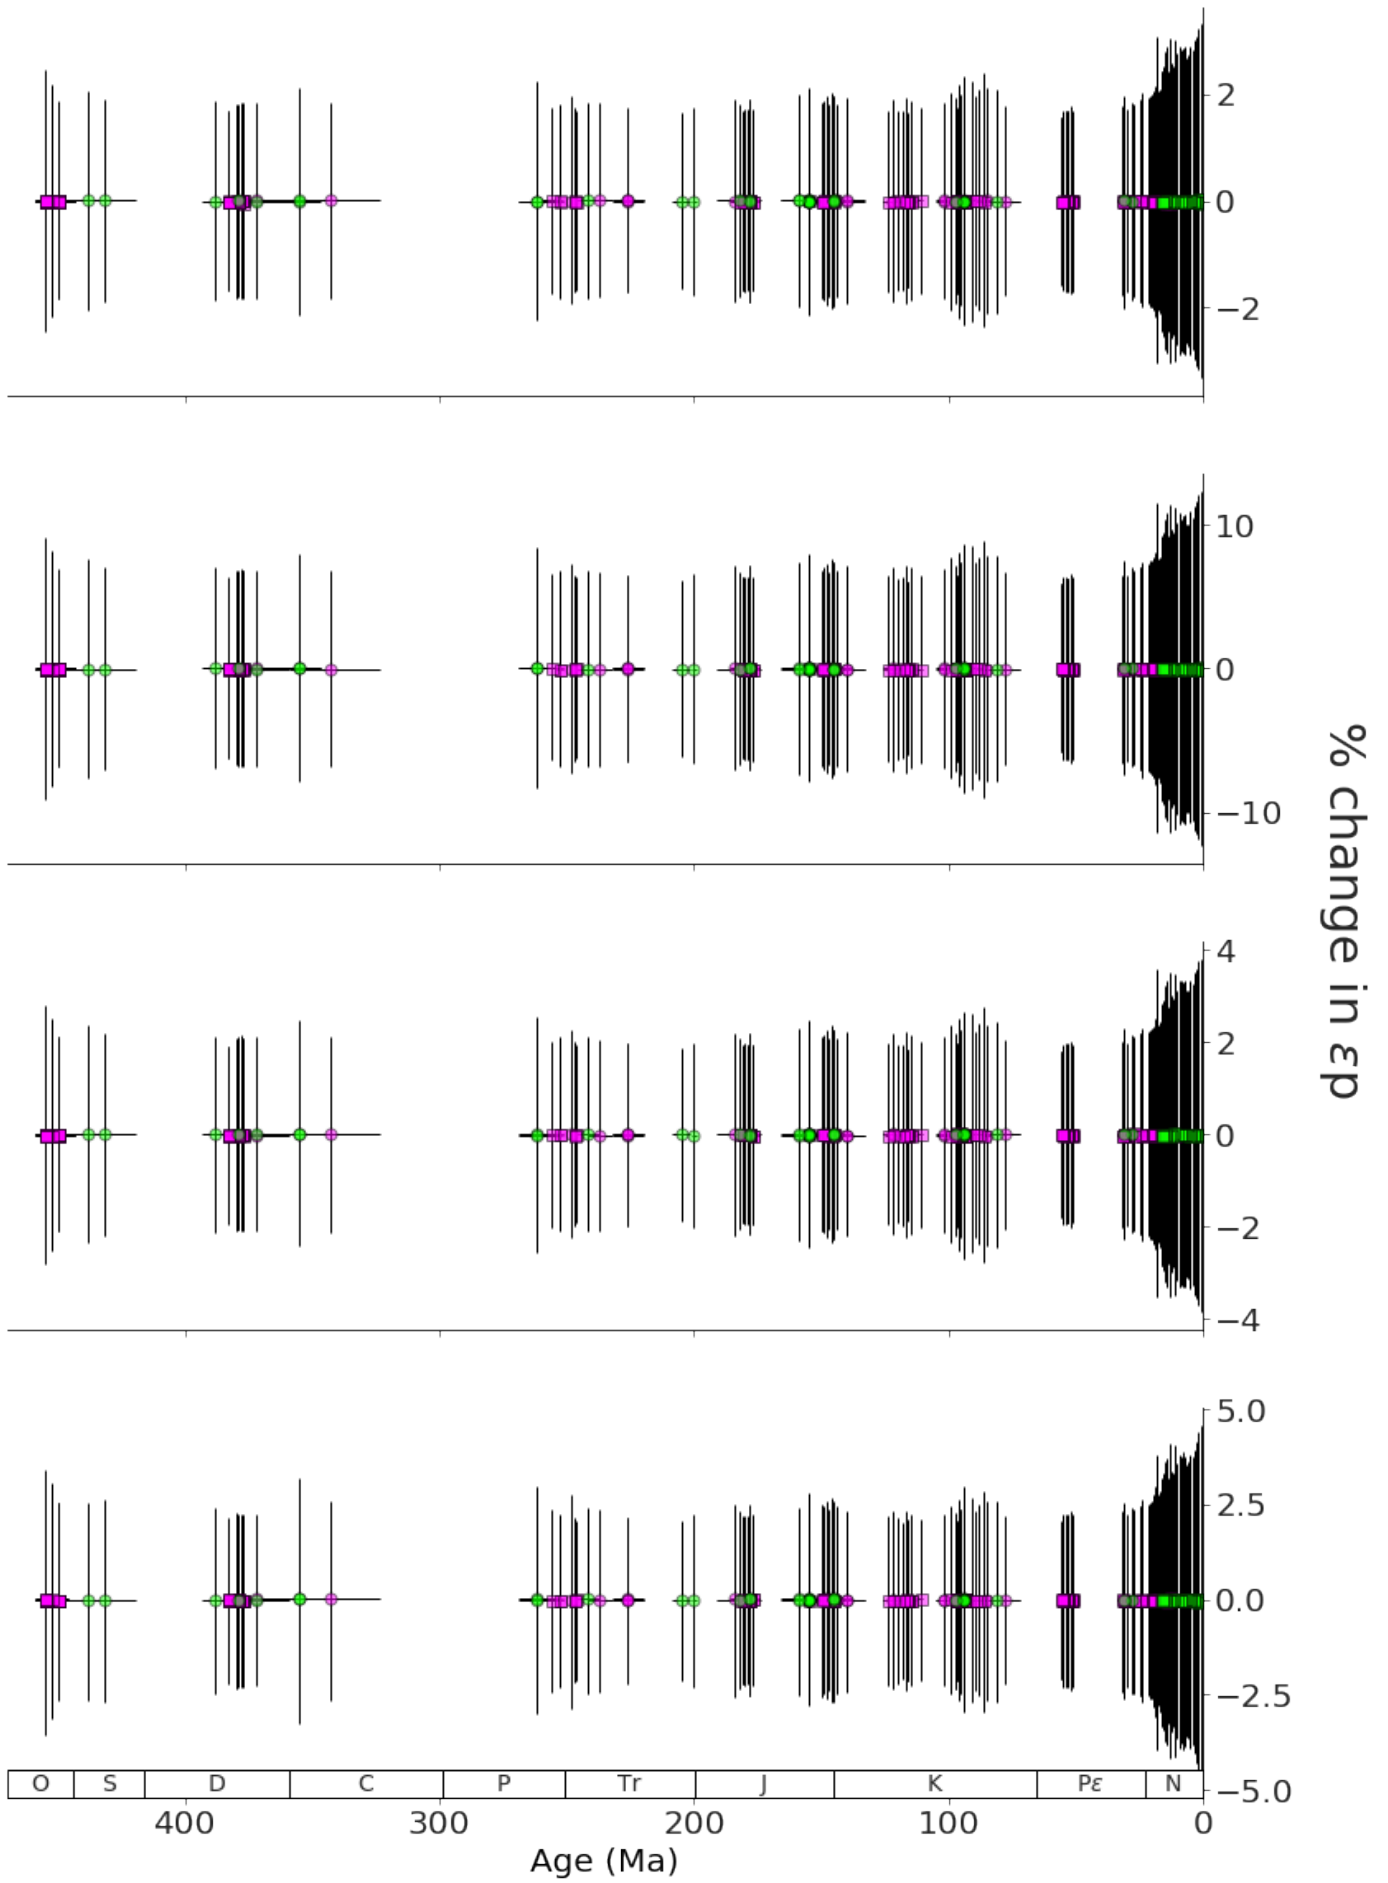

### 4.0.3 same as above but absolute values rather than percent

```
In [25]: figure(figsize=(13,20))
```

```
def plotit(r,r_baseline,frac=0.03):
    x=array(r['Ma'])
    xu=array(r['Ma_U'])
    xl=array(r['Ma_L'])

    idx_os_mo=r['index_other_oil']
    idx_os_ms=r['index_other_sedimentary']
    idx_cs_mo=r['index_current_oil']
    idx_cs_ms=r['index_current_sedimentary']

    val=(r['p']-r_baseline['p'])
    y=np.median(val,axis=1)
    yl=np.percentile(val,(100-errorbar_level)/2,axis=1)
    yu=np.percentile(val,100-(100-errorbar_level)/2,axis=1)

    xerr=array([x-xl,xu-x])
    yerr=array([y-yl,yu-y])

    alpha=0.5
    plot(x[idx_os_mo],y[idx_os_mo], 'o',ms=7,color=color1,markeredgecolor='k',markeredgewidth=1,
        label='Previously Published, Oil',alpha=alpha)
    plot(x[idx_os_ms],y[idx_os_ms], 's',ms=7,color=color1,markeredgecolor='k',markeredgewidth=1,
        label='Previously Published, Sediment',alpha=alpha)
    plot(x[idx_cs_mo],y[idx_cs_mo], 'o',ms=7,color=color2,markeredgecolor='k',markeredgewidth=1,
        label='Current Study, Oil',alpha=alpha)
    plot(x[idx_cs_ms],y[idx_cs_ms], 's',ms=7,color=color2,markeredgecolor='k',markeredgewidth=1,
        label='Current Study, Sediment',alpha=alpha)

    errorbar(x,y,xerr=xerr,yerr=yerr,fmt='none',lw=1,zorder=0,ecolor='k',capsize=0)
    ax=gca()
    ax.invert_xaxis()
    xlim([470,0])
    xlabel('Age (Ma)')

    ax.yaxis.set_label_position("right")
    ax.yaxis.set_ticks_position("right")

    #h=ylabel(r'% change in p ($^{o}/_{oo}$)',rotation=270,va='bottom',labelpad=20)
    #h=ylabel(r'$\delta^{13}C$ of Phytane ($_{\%}/_{\%}$)',rotation=270,va='bottom',labelpad=20)

    grid('off')

    add_time_periods(frac=frac)

    #=====

    subplot(4,1,1)
    plotit(r_Ph,r_baseline,frac=0)
    title('13C of phytane  $\delta$  0.5')
    gca().set_xticklabels([])
    gca().set_xlabel('')
    gca().spines['left'].set_visible(False)
    gca().spines['top'].set_visible(False)

    subplot(4,1,2)
    plotit(r_,r_baseline,frac=0)
    title('Offset between biomarker and biomass ()  $\delta$  1.3')
    gca().set_xticklabels([])
    gca().set_xlabel('')
    gca().spines['left'].set_visible(False)
    gca().spines['top'].set_visible(False)
```

```

subplot(4,1,3)
plotit(r_a,r_baseline,frac=0)
title('13C of planktonic foraminifera  $\delta$  0.2/0.4')
gca().set_xticklabels([])
gca().set_xlabel('')
gca().spines['left'].set_visible(False)
gca().spines['top'].set_visible(False)

subplot(4,1,4)
plotit(r_TC,r_baseline,frac=0.07)
title('Temperature  $\delta$  4°C')
gca().spines['left'].set_visible(False)
gca().spines['top'].set_visible(False)

gcf().text(0.99, 0.5, r'% change in  $\epsilon_p$ ', fontsize=30,
          ha='center', va='center', rotation=270)

if saveit:
    plt.savefig("../figures/Fig absolute change p uncertainty associated with each
parameter.png",dpi=900,bbox_inches='tight')

```

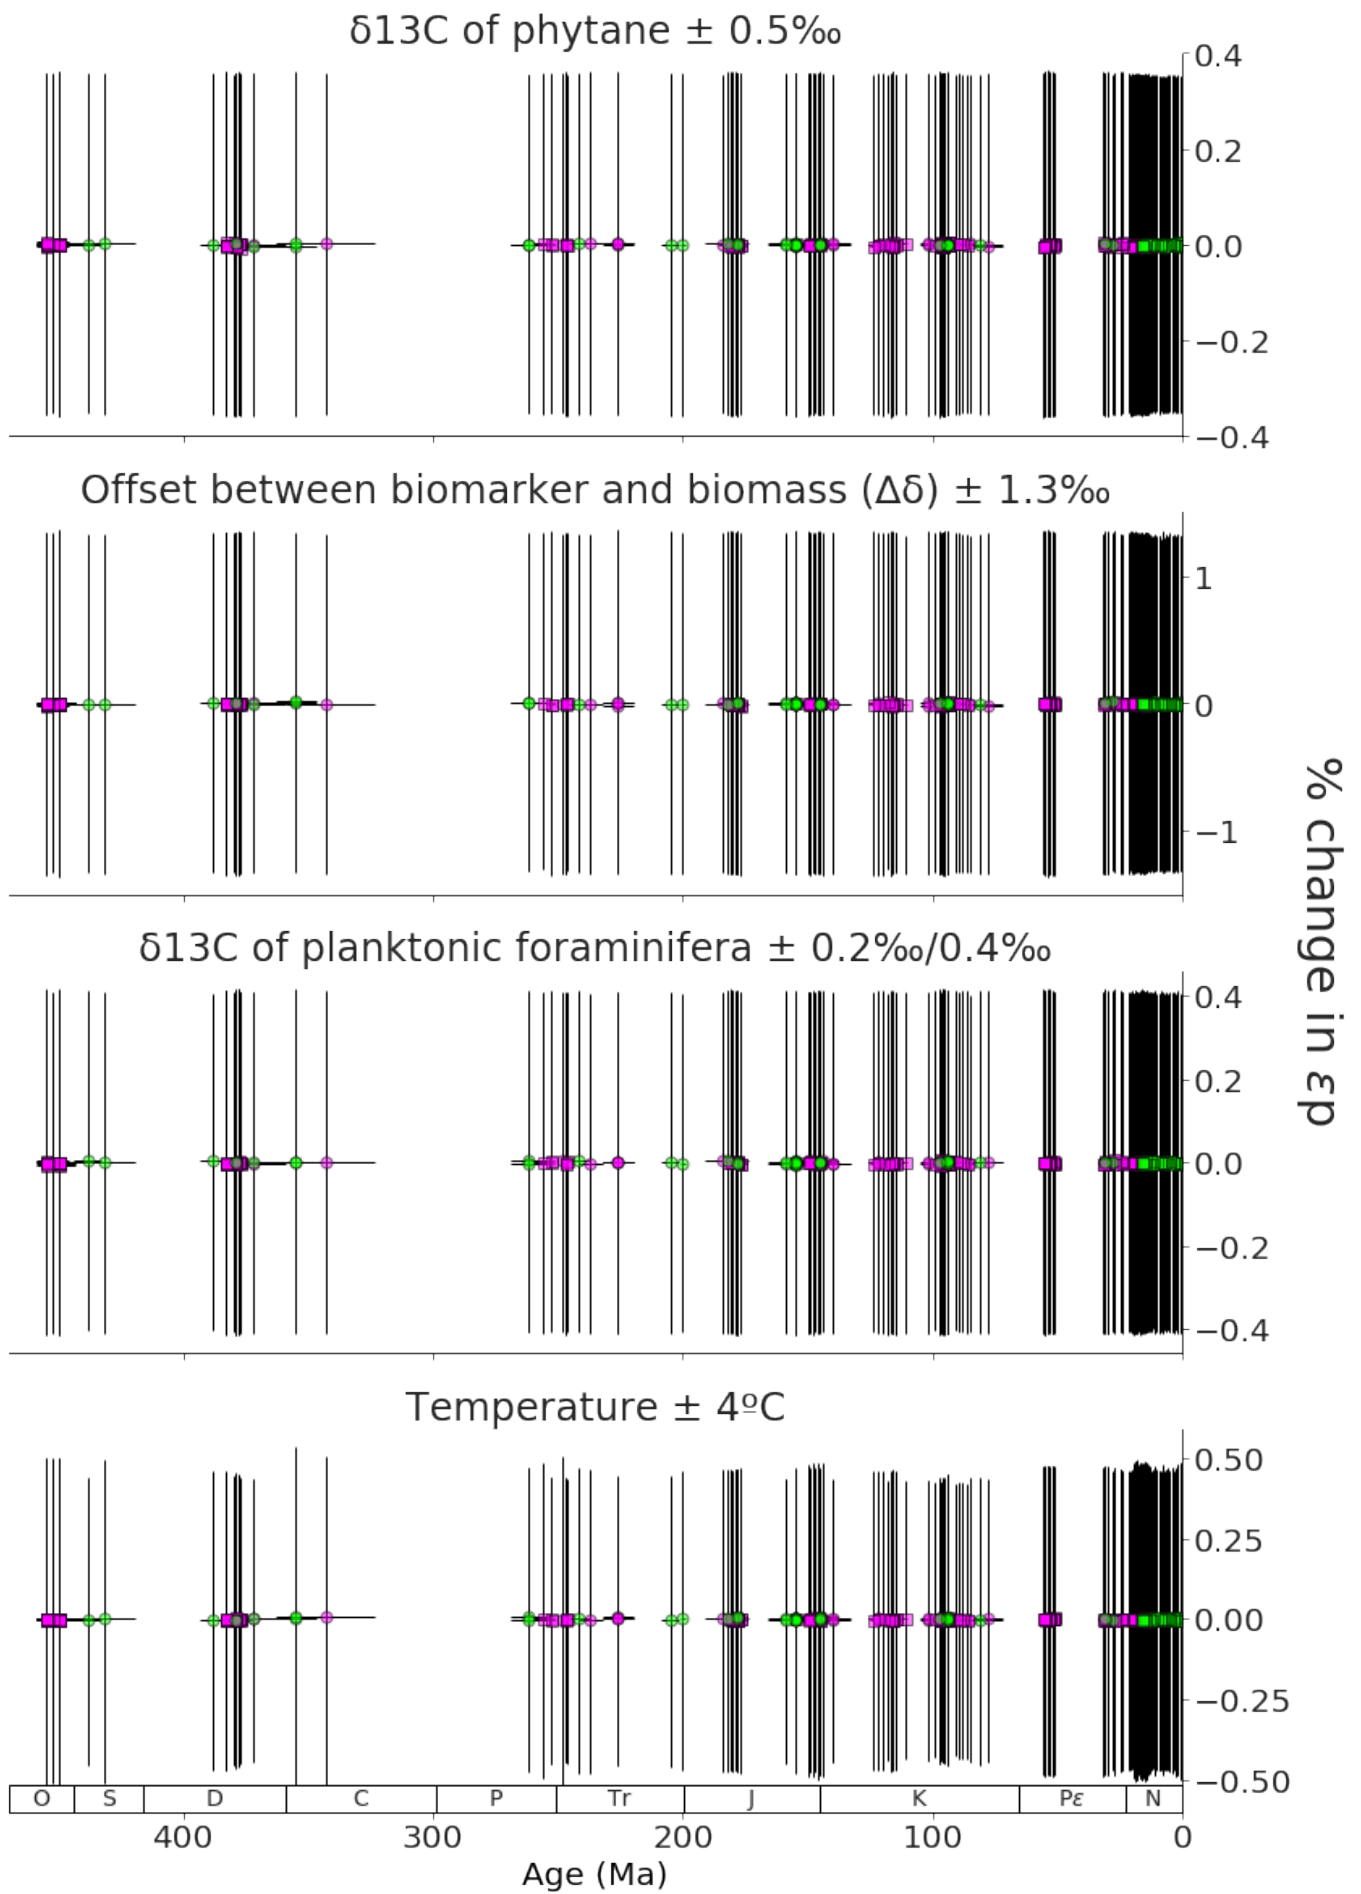

```
In [26]: figure(figsize=(13,20))
```

```
def plotit(r,r_baseline,frac=0.03):
    x=array(r['Ma'])
    xu=array(r['Ma_U'])
    xl=array(r['Ma_L'])

    idx_os_mo=r['index_other_oil']
    idx_os_ms=r['index_other_sedimentary']
    idx_cs_mo=r['index_current_oil']
    idx_cs_ms=r['index_current_sedimentary']

    val=(r['p']-r_baseline['p'])
    y=np.median(val,axis=1)
    yl=np.percentile(val,(100-errorbar_level)/2,axis=1)
    yu=np.percentile(val,100-(100-errorbar_level)/2,axis=1)

    xerr=array([x-xl,xu-x])
    yerr=array([y-yl,yu-y])

    alpha=0.5
    plot(x[idx_os_mo],y[idx_os_mo],'o',ms=7,color=color1,markeredgecolor='k',markeredgewidth=1,
         label='Previously Published, Oil',alpha=alpha)
    plot(x[idx_os_ms],y[idx_os_ms],'s',ms=7,color=color1,markeredgecolor='k',markeredgewidth=1,
         label='Previously Published, Sediment',alpha=alpha)
    plot(x[idx_cs_mo],y[idx_cs_mo],'o',ms=7,color=color2,markeredgecolor='k',markeredgewidth=1,
         label='Current Study, Oil',alpha=alpha)
    plot(x[idx_cs_ms],y[idx_cs_ms],'s',ms=7,color=color2,markeredgecolor='k',markeredgewidth=1,
         label='Current Study, Sediment',alpha=alpha)

    errorbar(x,y,xerr=xerr,yerr=yerr,fmt='none',lw=1,zorder=0,ecolor='k',capsize=0)
    ax=gca()
    ax.invert_xaxis()
    xlim([470,0])
    xlabel('Age (Ma)')

    ax.yaxis.set_label_position("right")
    ax.yaxis.set_ticks_position("right")

    #h=ylabel(r'% change in p ($^{o}/_{oo}$)',rotation=270,va='bottom',labelpad=20)
    #h=ylabel(r'$\delta^{13}C$ of Phytane ($^{l}/_{l}$)',rotation=270,va='bottom',labelpad=20)

    grid('off')

    add_time_periods(frac=frac)

    #=====

    subplot(4,1,1)
    plotit(r_Ph,r_baseline,frac=0)
    #title('13C of phytane  $\delta$  0.5')
    gca().set_xticklabels([])
    gca().set_xlabel('')
    gca().spines['left'].set_visible(False)
    gca().spines['top'].set_visible(False)

    subplot(4,1,2)
    plotit(r_,r_baseline,frac=0)
    #title('Offset between biomarker and biomass ()  $\delta$  1.3')
    gca().set_xticklabels([])
    gca().set_xlabel('')
    gca().spines['left'].set_visible(False)
    gca().spines['top'].set_visible(False)

    subplot(4,1,3)
    plotit(r_a,r_baseline,frac=0)
    #title('13C of planktonic foraminifera  $\delta$  0.2')
```

```

gca().set_xticklabels([])
gca().set_xlabel('')
gca().spines['left'].set_visible(False)
gca().spines['top'].set_visible(False)

subplot(4,1,4)
plotit(r_TC,r_baseline,frac=0.07)
#title('Temperature s 4žC')
gca().spines['left'].set_visible(False)
gca().spines['top'].set_visible(False)

gcf().text(0.99, 0.5, r'% change in $\epsilon_p$', fontsize=30,
          ha='center', va='center', rotation=270)

if saveit:
    plt.savefig("../figures/Fig no titles absolute change p uncertainty associated with each
parameter.png",dpi=900,bbbox_inches='tight')

```



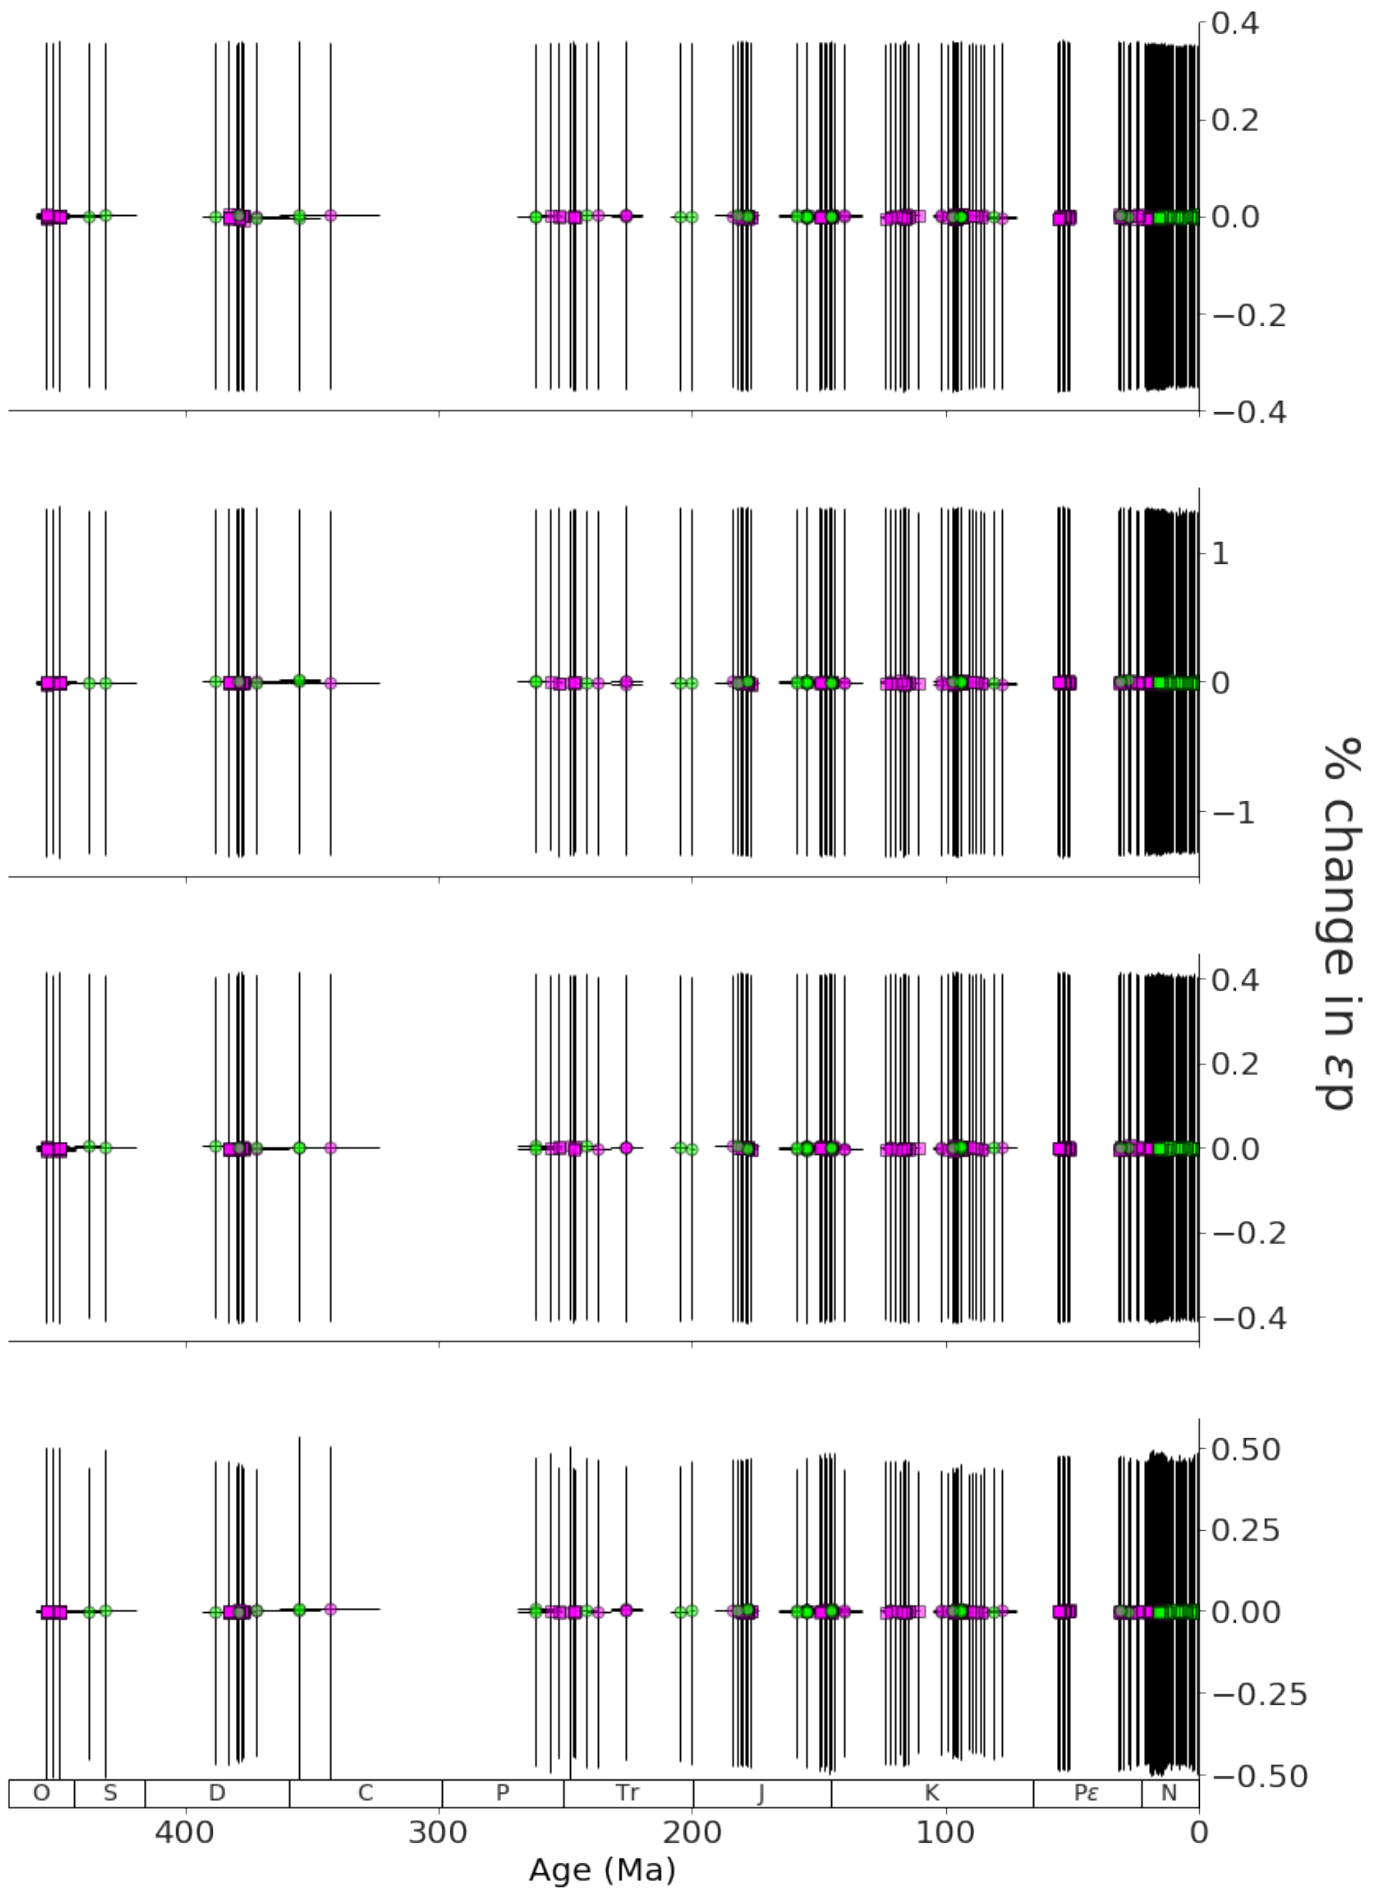

## 4.1 actual value of $\epsilon_p$ for discrete values of parameters

```
In [27]: # 13C of phytane  $\delta$  0.5 (Ph)
# Offset between biomarker and biomass ()  $\delta$  1.3 (R)
# 13C of planktonic foraminifera  $\delta$  0.2/0.4 (a)
# Temperature  $\delta$  4°C (TC)

Ph_arr=[-.5,-.25,.25,.5]
_arr=[3.50-1.28,3.50-1.28/2,3.50+1.28/2,3.50+1.28]
a_arr=[-.4,-.2,.2,.4]
TC_arr=[-4,-2,2,4]

In [28]: %%time
r_baseline=get_results(fix_parameters=['Ph','','a','TC'])

r_Ph=[]
for Ph in Ph_arr:
    r_Ph.append(get_results(fix_parameters=['Ph','','a','TC'],Ph=Ph))

r_=[]
for _ in _arr:
    r_.append(get_results(fix_parameters=['Ph','','a','TC'],_=))

r_a=[]
for a in a_arr:
    r_a.append(get_results(fix_parameters=['Ph','','a','TC'],a=a))

r_TC=[]
for TC in TC_arr:
    r_TC.append(get_results(fix_parameters=['Ph','','a','TC'],TC=TC))
```

```
Setting Ph to -0.5
Setting Ph to -0.25
Setting Ph to 0.25
Setting Ph to 0.5
Setting to 2.2199999999999998
Setting to 2.86
Setting to 4.14
Setting to 4.78
Setting a to -0.4
Setting a to -0.2
Setting a to 0.2
Setting a to 0.4
Setting TC to -4
Setting TC to -2
Setting TC to 2
Setting TC to 4
CPU times: user 4min, sys: 29 s, total: 4min 29s
Wall time: 4min 32s
```

```
In [29]: figure(figsize=(13,20))

def plotit(r,r_baseline,frac=0.03,color=None):

    x=array(r['Ma'])
    xu=array(r['Ma_U'])
    xl=array(r['Ma_L'])

    idx_os_mo=r['index_other_oil']
    idx_os_ms=r['index_other_sedimentary']
    idx_cs_mo=r['index_current_oil']
    idx_cs_ms=r['index_current_sedimentary']

    val=(r['p']-r_baseline['p'])/r_baseline['p']*100
    y=np.median(val,axis=1)
```

```

yl=np.percentile(val,(100-errorbar_level)/2,axis=1)
yu=np.percentile(val,100-(100-errorbar_level)/2,axis=1)

xerr=array([x-xl,xu-x])
yerr=array([y-yl,yu-y])

alpha=0.8

if color is None:
    plot(x[idx_os_mo],y[idx_os_mo],'o',ms=7,color=color1,markeredgecolor='k',markeredgewidth=1,
        label='Previously Published, Oil',alpha=alpha)
    plot(x[idx_os_ms],y[idx_os_ms],'s',ms=7,color=color1,markeredgecolor='k',markeredgewidth=1,
        label='Previously Published, Sediment',alpha=alpha)
    plot(x[idx_cs_mo],y[idx_cs_mo],'o',ms=7,color=color2,markeredgecolor='k',markeredgewidth=1,
        label='Current Study, Oil',alpha=alpha)
    plot(x[idx_cs_ms],y[idx_cs_ms],'s',ms=7,color=color2,markeredgecolor='k',markeredgewidth=1,
        label='Current Study, Sediment',alpha=alpha)
else:
    plot(x,y,'o',ms=7,color=color,markeredgecolor='k',markeredgewidth=1,alpha=alpha)

#errorbar(x,y,xerr=xerr,yerr=yerr,fmt='none',lw=1,zorder=0,ecolor='k',capsize=0)
ax=gca()
ax.invert_xaxis()
xlim([470,0])
xlabel('Age (Ma)')

ax.yaxis.set_label_position("right")
ax.yaxis.set_ticks_position("right")

#h=ylabel(r'% change in p ($^{o}/_{oo}$)',rotation=270,va='bottom',labelpad=20)
#h=ylabel(r'$\delta^{13}C$ of Phytane ($^{o}/_{\%}/_{\%}$)',rotation=270,va='bottom',labelpad=20)

grid('off')

add_time_periods(frac=frac)

#=====

subplot(4,1,1)

for r,c in zip(r_Ph,['magenta','cyan','yellow','green']):
    plotit(r,r_baseline,frac=0,color=c)

xl=gca().set_xlim()
plot(xl,[0,0],'k:',linewidth=1)

LL=legend([r'$\delta^{13}C$ of Phytane=%g $^{o}/_{oo}$' % Ph for Ph in Ph_arr],
    loc='upper left',frameon=True,fontsize=14)
LL.get_frame().set_facecolor('#EEEEEE')

gca().set_xticklabels([])
gca().set_xlabel('')

gca().spines['left'].set_visible(False)
gca().spines['top'].set_visible(False)

subplot(4,1,2)

for r,c in zip(r_,['magenta','cyan','yellow','green']):
    plotit(r,r_baseline,frac=0,color=c)

xl=gca().set_xlim()
plot(xl,[0,0],'k:',linewidth=1)

gca().set_xticklabels([])
gca().set_xlabel('')

gca().spines['left'].set_visible(False)
gca().spines['top'].set_visible(False)

LL=legend(['=%.1f' % for in _arr],

```

```

        loc='upper left',frameon=True,fontsize=14)
LL.get_frame().set_facecolor('#EEEEEE')

subplot(4,1,3)

for r,c in zip(r_a,['magenta','cyan','yellow','green']):
    plotit(r,r_baseline,frac=0,color=c)

xl=gca().set_xlim()
plot(xl,[0,0],'k:',linewidth=1)

gca().set_xticklabels([])
gca().set_xlabel('')

gca().spines['left'].set_visible(False)
gca().spines['top'].set_visible(False)

LL=legend(['a=%.1f' % a for a in a_arr],
        loc='upper left',frameon=True,fontsize=14)
LL.get_frame().set_facecolor('#EEEEEE')

subplot(4,1,4)

for r,c in zip(r_TC,['magenta','cyan','yellow','green']):
    if c=='green':
        plotit(r,r_baseline,frac=0.07,color=c)
    else:
        plotit(r,r_baseline,frac=0,color=c)

xl=gca().set_xlim()
plot(xl,[0,0],'k:',linewidth=1)

gca().spines['left'].set_visible(False)
gca().spines['top'].set_visible(False)

LL=legend(['T=%d' % T for T in TC_arr],
        loc='upper left',frameon=True,fontsize=14)
LL.get_frame().set_facecolor('#EEEEEE')

gcf().text(0.99, 0.5, r'% change in $\epsilon$', fontsize=30,
        ha='center', va='center', rotation=270)

if saveit:
    plt.savefig("../figures/Fig percent change epsilon uncertainty associated with discrete values of each
parameter.png",dpi=900,bbox_inches='tight')

```

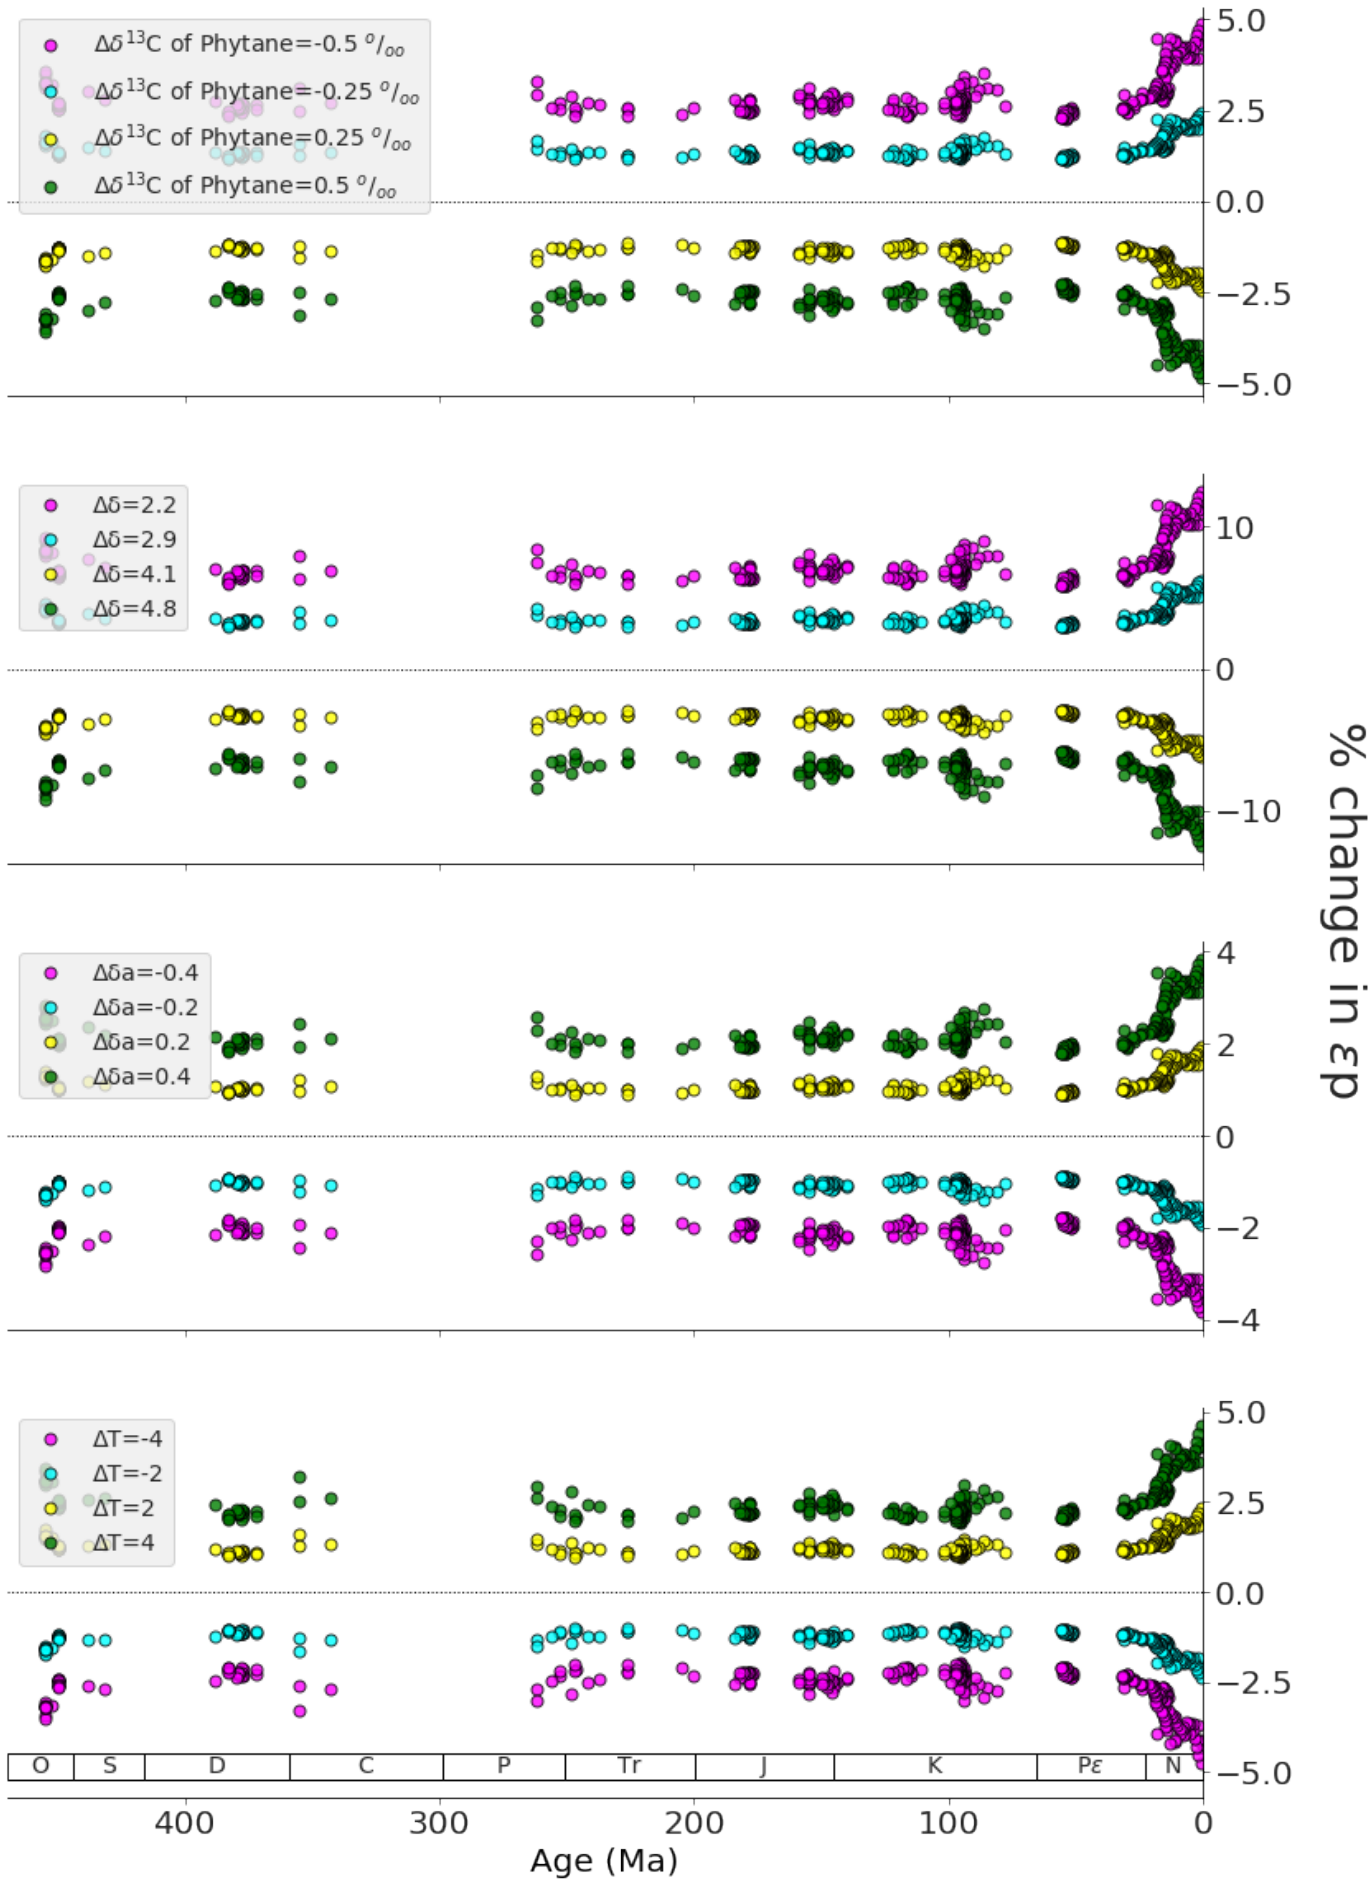

## 5 *Figure pCO<sub>2</sub>[aq] from phytane breakdown on the uncertainty associated with each individual parameter*

### 5.0.1 *, expressed in a 2-part figure based on the three parameters making up the p equation*

$$C02[aq] = b / (f - p)$$

$$pCO2 = [C02(aq)] / K0$$

A: b  $\hat{=}$  60 kg tM-1 (ranging from about 120-230)

B: f  $\hat{=}$  1.5 (ranging from 25-28)

C: K0: Temperature  $\hat{=}$  4°C

A. b (influence on ppm) B. b (influence on %)

C. f (ppm) D. f (%)

E. K0 temperature (ppm) F. K0 temperature (%)

```
In [30]: %%time
r_baseline=get_results(fix_parameters=['b','f','TC'])
r_b=get_results(fix_parameters=['f','TC'])
r_f=get_results(fix_parameters=['b','TC'])
r_TC=get_results(fix_parameters=['b','f'])
```

CPU times: user 1min 3s, sys: 10 s, total: 1min 13s

Wall time: 1min 15s

```
In [31]: figure(figsize=(13,20))
```

```
def plotit(r,r_baseline,frac=0.03):
    x=array(r['Ma'])
    xu=array(r['Ma_U'])
    xl=array(r['Ma_L'])

    idx_os_mo=r['index_other_oil']
    idx_os_ms=r['index_other_sedimentary']
    idx_cs_mo=r['index_current_oil']
    idx_cs_ms=r['index_current_sedimentary']

    val=(r['pCO2']-r_baseline['pCO2'])/r_baseline['pCO2']*100
    y=np.median(val,axis=1)
    yl=np.percentile(val,(100-errorbar_level)/2,axis=1)
    yu=np.percentile(val,100-(100-errorbar_level)/2,axis=1)

    xerr=array([x-xl,xu-x])
    yerr=array([y-yl,yu-y])

    alpha=0.5
    plot(x[idx_os_mo],y[idx_os_mo],'o',ms=7,color=color1,markeredgecolor='k',markeredgewidth=1,
        label='Previously Published, Oil',alpha=alpha)
    plot(x[idx_os_ms],y[idx_os_ms],'s',ms=7,color=color1,markeredgecolor='k',markeredgewidth=1,
        label='Previously Published, Sediment',alpha=alpha)
    plot(x[idx_cs_mo],y[idx_cs_mo],'o',ms=7,color=color2,markeredgecolor='k',markeredgewidth=1,
        label='Current Study, Oil',alpha=alpha)
    plot(x[idx_cs_ms],y[idx_cs_ms],'s',ms=7,color=color2,markeredgecolor='k',markeredgewidth=1,
        label='Current Study, Sediment',alpha=alpha)

    errorbar(x,y,xerr=xerr,yerr=yerr,fmt='none',lw=1,zorder=0,ecolor='k',capsize=0)
    ax=gca()
```

```

ax.invert_xaxis()
xlim([470,0])
xlabel('Age (Ma)')

ax.yaxis.set_label_position("right")
ax.yaxis.set_ticks_position("right")

#h=ylabel(r'% change in p ( $\delta^{13}C$ )',rotation=270,va='bottom',labelpad=20)
#h=ylabel(r'$\delta^{13}C$ of Phytane ( $\delta^{13}C$ )',rotation=270,va='bottom',labelpad=20)

grid('off')

add_time_periods(frac=frac)

#=====

subplot(3,1,1)
plotit(r_b,r_baseline,frac=0)
title('b  $\dot{s}$  60 kg tM-1')
gca().set_xticklabels([])
gca().set_xlabel('')
gca().spines['left'].set_visible(False)
gca().spines['top'].set_visible(False)

subplot(3,1,2)
plotit(r_f,r_baseline,frac=0)
title(r'$\epsilon$  $\dot{s}$  1.5')
gca().set_xticklabels([])
gca().set_xlabel('')
gca().spines['left'].set_visible(False)
gca().spines['top'].set_visible(False)

subplot(3,1,3)
plotit(r_TC,r_baseline,frac=0)
title('Temperature  $\dot{s}$  4°C')
gca().spines['left'].set_visible(False)
gca().spines['top'].set_visible(False)

gcf().text(0.99, 0.5, r'% change in reconstructed pCO2', fontsize=30,
          ha='center', va='center', rotation=270)

if saveit:
    plt.savefig("../figures/Fig percent change pCO2 uncertainty associated with each
parameter.png",dpi=900,bbbox_inches='tight')

```

$b \pm 60\text{‰ kg } \mu\text{M}^{-1}$

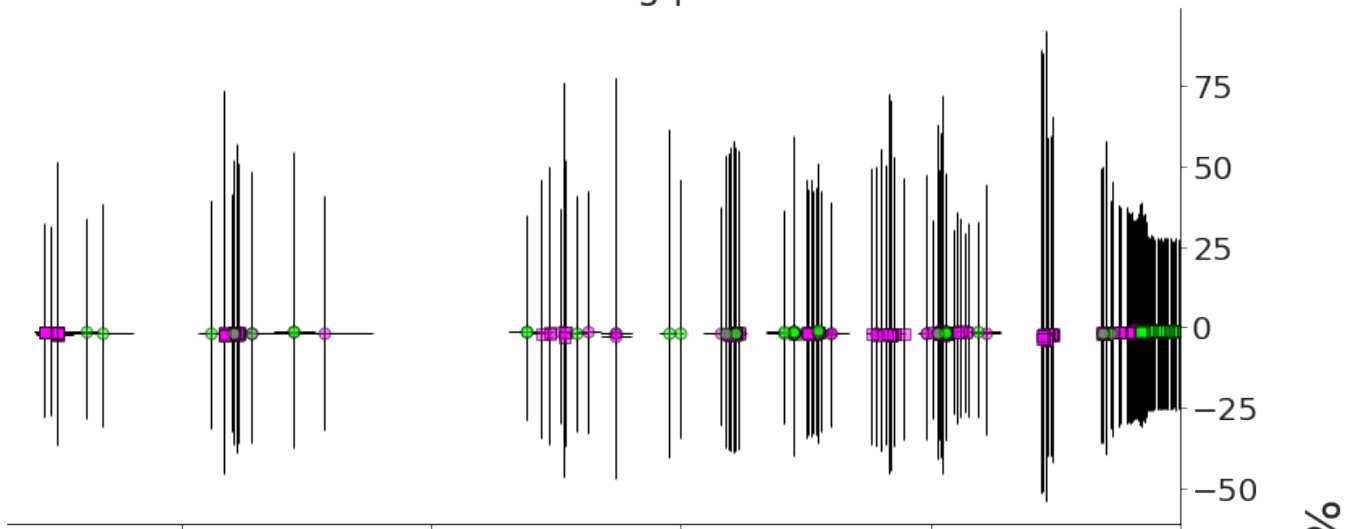

$\epsilon_f \pm 1.5\text{‰}$

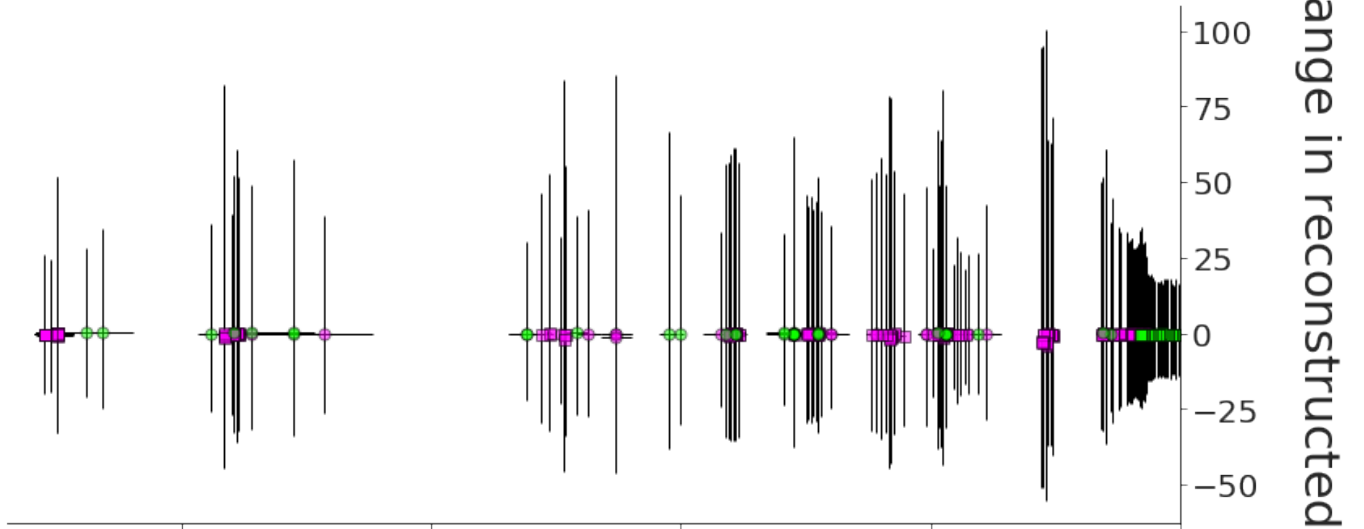

Temperature  $\pm 4^\circ\text{C}$

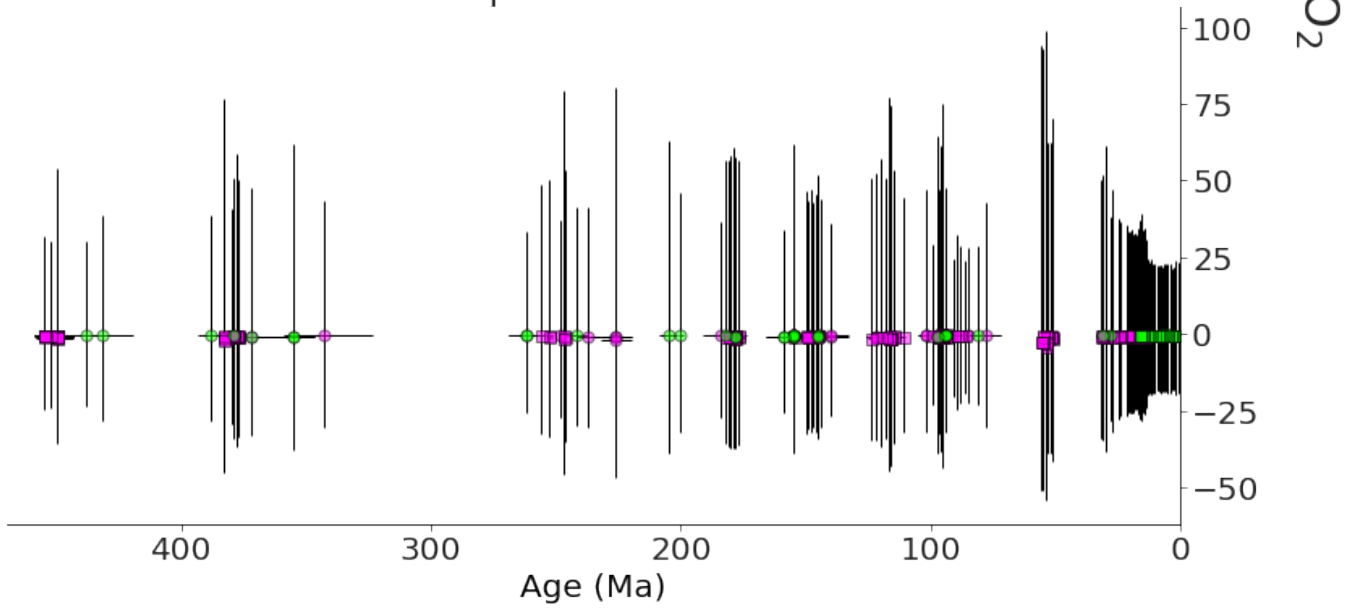



```
In [32]: figure(figsize=(13,20))
```

```
def plotit(r,r_baseline,frac=0.03):
    x=array(r['Ma'])
    xu=array(r['Ma_U'])
    xl=array(r['Ma_L'])

    idx_os_mo=r['index_other_oil']
    idx_os_ms=r['index_other_sedimentary']
    idx_cs_mo=r['index_current_oil']
    idx_cs_ms=r['index_current_sedimentary']

    val=(r['pCO2']-r_baseline['pCO2'])/r_baseline['pCO2']*100
    y=np.median(val,axis=1)
    yl=np.percentile(val,(100-errorbar_level)/2,axis=1)
    yu=np.percentile(val,100-(100-errorbar_level)/2,axis=1)

    xerr=array([x-xl,xu-x])
    yerr=array([y-yl,yu-y])

    alpha=0.5
    plot(x[idx_os_mo],y[idx_os_mo],'o',ms=7,color=color1,markeredgecolor='k',markeredgewidth=1,
        label='Previously Published, Oil',alpha=alpha)
    plot(x[idx_os_ms],y[idx_os_ms],'s',ms=7,color=color1,markeredgecolor='k',markeredgewidth=1,
        label='Previously Published, Sediment',alpha=alpha)
    plot(x[idx_cs_mo],y[idx_cs_mo],'o',ms=7,color=color2,markeredgecolor='k',markeredgewidth=1,
        label='Current Study, Oil',alpha=alpha)
    plot(x[idx_cs_ms],y[idx_cs_ms],'s',ms=7,color=color2,markeredgecolor='k',markeredgewidth=1,
        label='Current Study, Sediment',alpha=alpha)

    errorbar(x,y,xerr=xerr,yerr=yerr,fmt='none',lw=1,zorder=0,ecolor='k',capsize=0)
    ax=gca()
    ax.invert_xaxis()
    xlim([470,0])
    xlabel('Age (Ma)')

    ax.yaxis.set_label_position("right")
    ax.yaxis.set_ticks_position("right")

    #h=ylabel(r'% change in p ($^{o}/_{oo}$)',rotation=270,va='bottom',labelpad=20)
    #h=ylabel(r'$\delta^{13}C$ of Phytane ($^{f}/_{f}$)',rotation=270,va='bottom',labelpad=20)

    grid('off')

    add_time_periods(frac=frac)

    #=====

    subplot(3,1,1)
    plotit(r_b,r_baseline,frac=0)
    #title('b s 60 kg tM-1')
    gca().set_xticklabels([])
    gca().set_xlabel('')
    gca().spines['left'].set_visible(False)
    gca().spines['top'].set_visible(False)

    subplot(3,1,2)
    plotit(r_f,r_baseline,frac=0)
    #title(r'$\epsilon_f$ s 1.5')
    gca().set_xticklabels([])
    gca().set_xlabel('')
    gca().spines['left'].set_visible(False)
    gca().spines['top'].set_visible(False)

    subplot(3,1,3)
    plotit(r_TC,r_baseline,frac=0)
    #title('Temperature s 4zC')
```

```
gca().spines['left'].set_visible(False)
gca().spines['top'].set_visible(False)

gcf().text(0.99, 0.5, r'% change in reconstructed pCO2', fontsize=30,
          ha='center', va='center', rotation=270)

if saveit:
    plt.savefig("../figures/Fig no titles percent change pCO2 uncertainty associated with each
parameter.png",dpi=900,bbox_inches='tight')
```

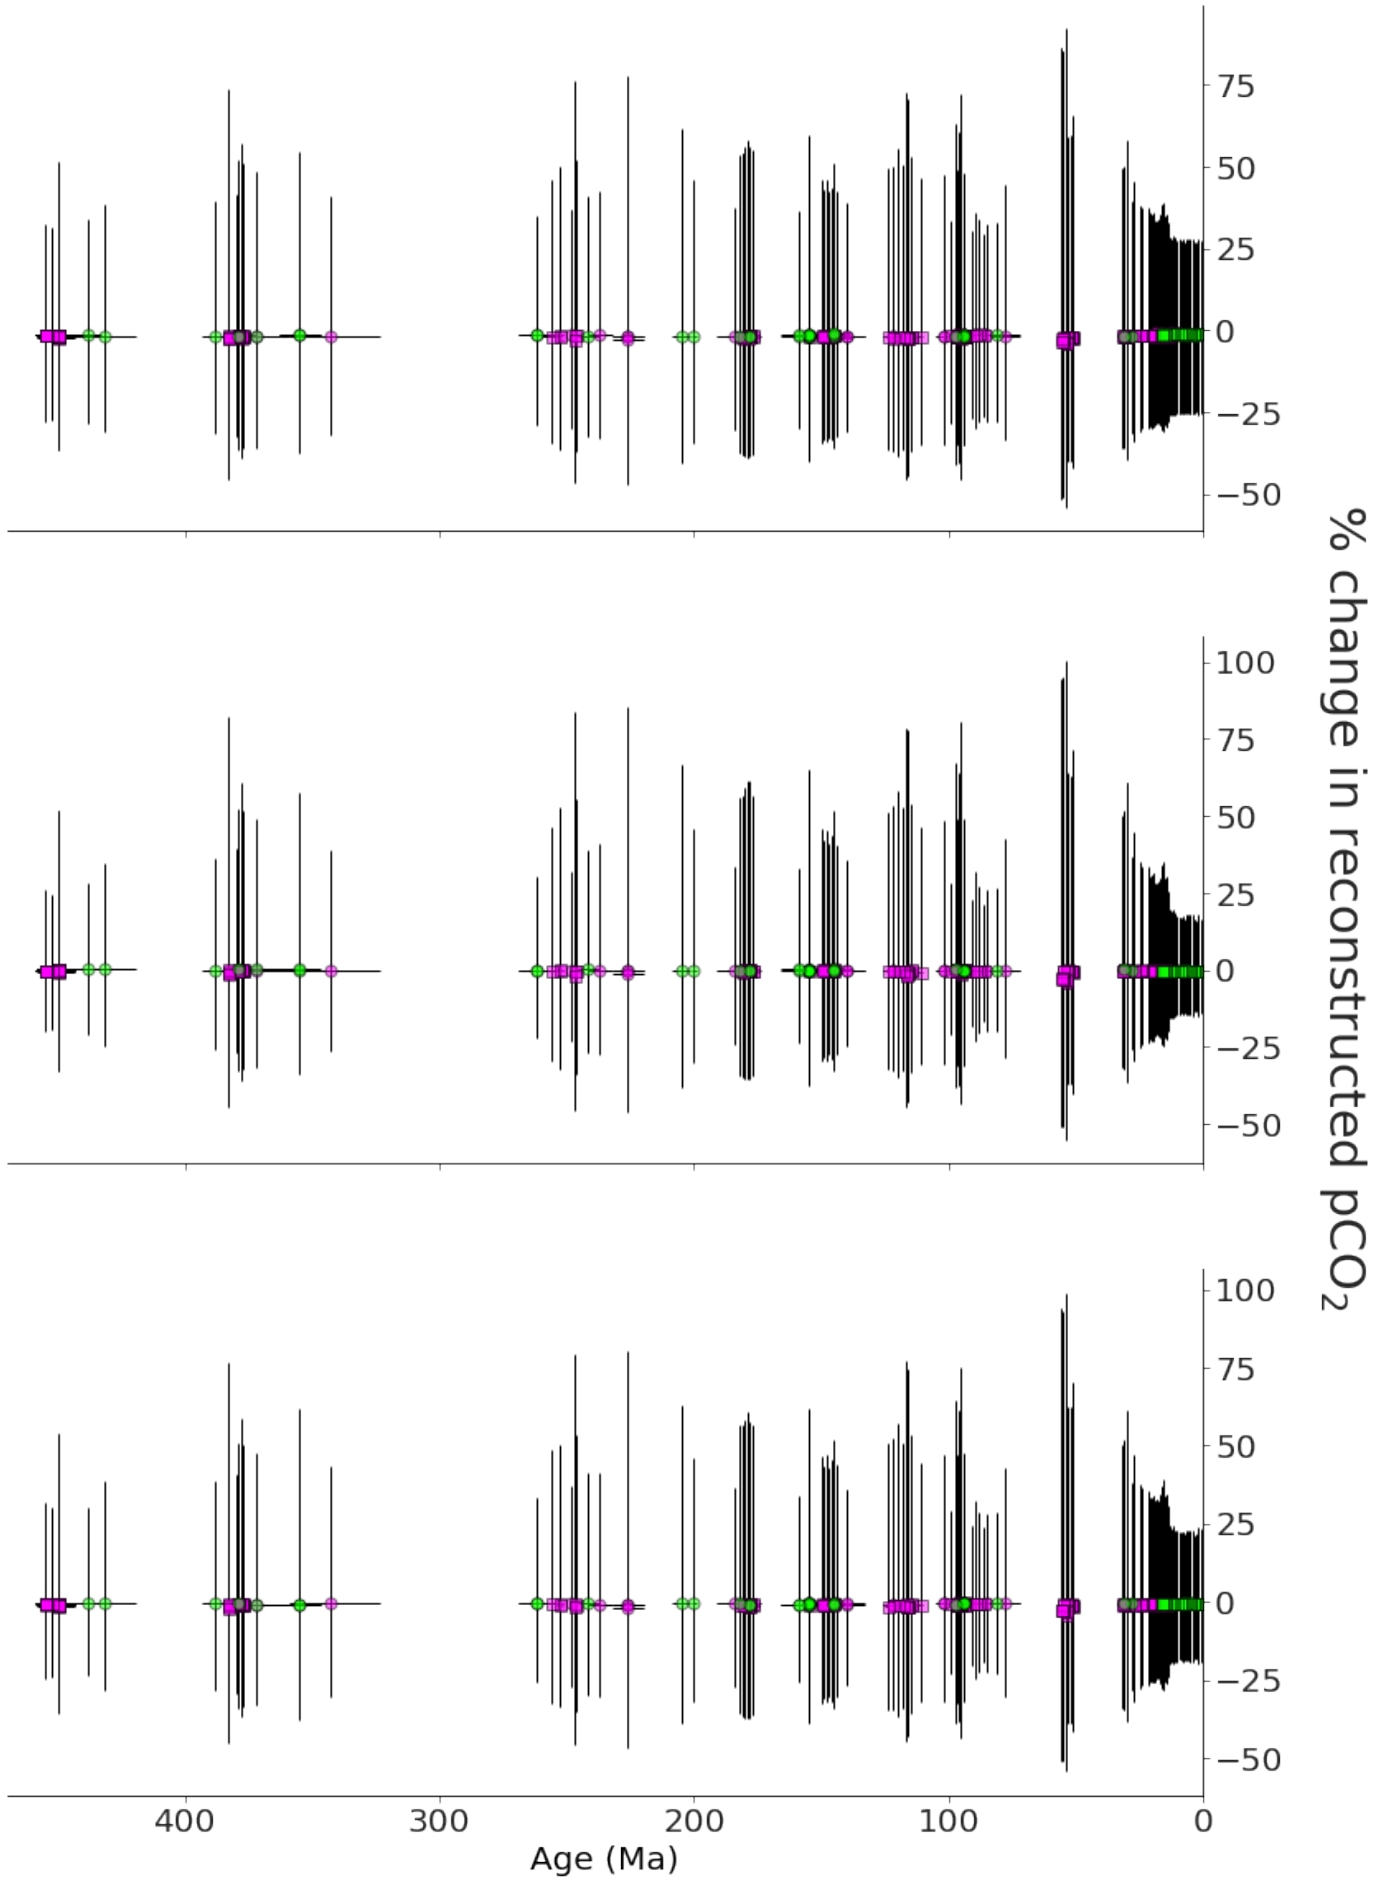

## 5.0.2 Absolute changes in pCO<sub>2</sub>

```
In [33]: figure(figsize=(13,20))
```

```
def plotit(r,r_baseline,frac=0.03):
    x=array(r['Ma'])
    xu=array(r['Ma_U'])
    xl=array(r['Ma_L'])

    idx_os_mo=r['index_other_oil']
    idx_os_ms=r['index_other_sedimentary']
    idx_cs_mo=r['index_current_oil']
    idx_cs_ms=r['index_current_sedimentary']

    val=(r['pCO2']-r_baseline['pCO2'])
    y=np.median(val,axis=1)
    yl=np.percentile(val,(100-errorbar_level)/2,axis=1)
    yu=np.percentile(val,100-(100-errorbar_level)/2,axis=1)

    xerr=array([x-xl,xu-x])
    yerr=array([y-yl,yu-y])

    alpha=0.5
    plot(x[idx_os_mo],y[idx_os_mo], 'o',ms=7,color=color1,markeredgecolor='k',markeredgewidth=1,
         label='Previously Published, Oil',alpha=alpha)
    plot(x[idx_os_ms],y[idx_os_ms], 's',ms=7,color=color1,markeredgecolor='k',markeredgewidth=1,
         label='Previously Published, Sediment',alpha=alpha)
    plot(x[idx_cs_mo],y[idx_cs_mo], 'o',ms=7,color=color2,markeredgecolor='k',markeredgewidth=1,
         label='Current Study, Oil',alpha=alpha)
    plot(x[idx_cs_ms],y[idx_cs_ms], 's',ms=7,color=color2,markeredgecolor='k',markeredgewidth=1,
         label='Current Study, Sediment',alpha=alpha)

    errorbar(x,y,xerr=xerr,yerr=yerr,fmt='none',lw=1,zorder=0,ecolor='k',capsize=0)
    ax=gca()
    ax.invert_xaxis()
    xlim([470,0])
    xlabel('Age (Ma)')

    ax.yaxis.set_label_position("right")
    ax.yaxis.set_ticks_position("right")

    #h=ylabel(r'% change in p ($^{o}/_{oo}$)',rotation=270,va='bottom',labelpad=20)
    #h=ylabel(r'$\delta^{13}C$ of Phytane ($^{X}/_{\%}$)',rotation=270,va='bottom',labelpad=20)

    grid('off')

    add_time_periods(frac=frac)

    #=====

    subplot(3,1,1)
    plotit(r_b,r_baseline,frac=0)
    title('b  $\dot{s}$  60 kg tM-1')
    gca().set_xticklabels([])
    gca().set_xlabel('')
    gca().spines['left'].set_visible(False)
    gca().spines['top'].set_visible(False)

    subplot(3,1,2)
    plotit(r_f,r_baseline,frac=0)
    title(r'\epsilonf  $\dot{s}$  1.5')
    gca().set_xticklabels([])
    gca().set_xlabel('')
    gca().spines['left'].set_visible(False)
    gca().spines['top'].set_visible(False)
```

```
subplot(3,1,3)
plotit(r_TC,r_baseline,frac=0)
title('Temperature  $\Delta$  4°C')
gca().spines['left'].set_visible(False)
gca().spines['top'].set_visible(False)

gcf().text(0.99, 0.5, r'Change in reconstructed pCO2 ( $\mu$ atm)', fontsize=30,
          ha='center', va='center', rotation=270)

if saveit:
    plt.savefig("../figures/Fig absolute change pCO2 uncertainty associated with each
parameter.png",dpi=900, bbox_inches='tight')
```

$b \pm 60\text{‰ kg } \mu\text{M}^{-1}$

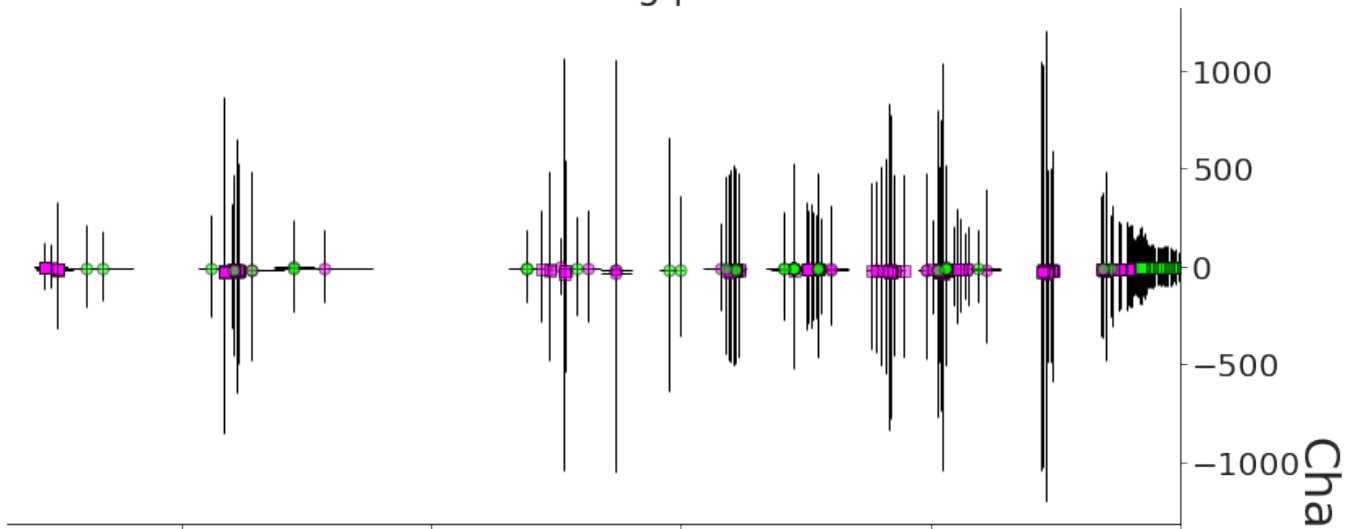

$\epsilon_f \pm 1.5\text{‰}$

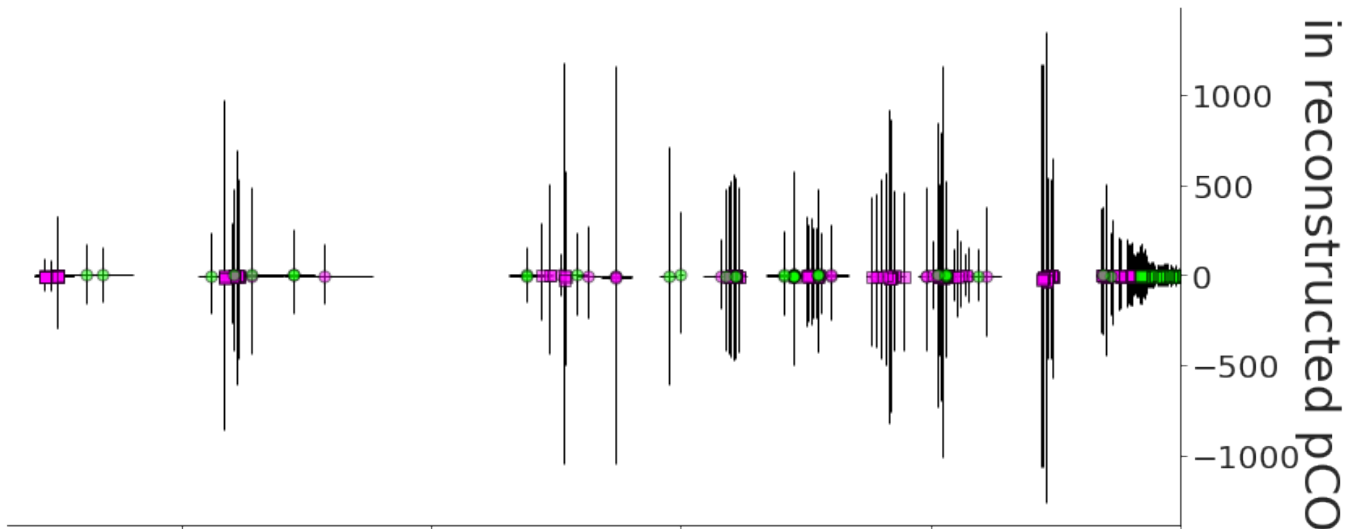

Temperature  $\pm 4^\circ\text{C}$

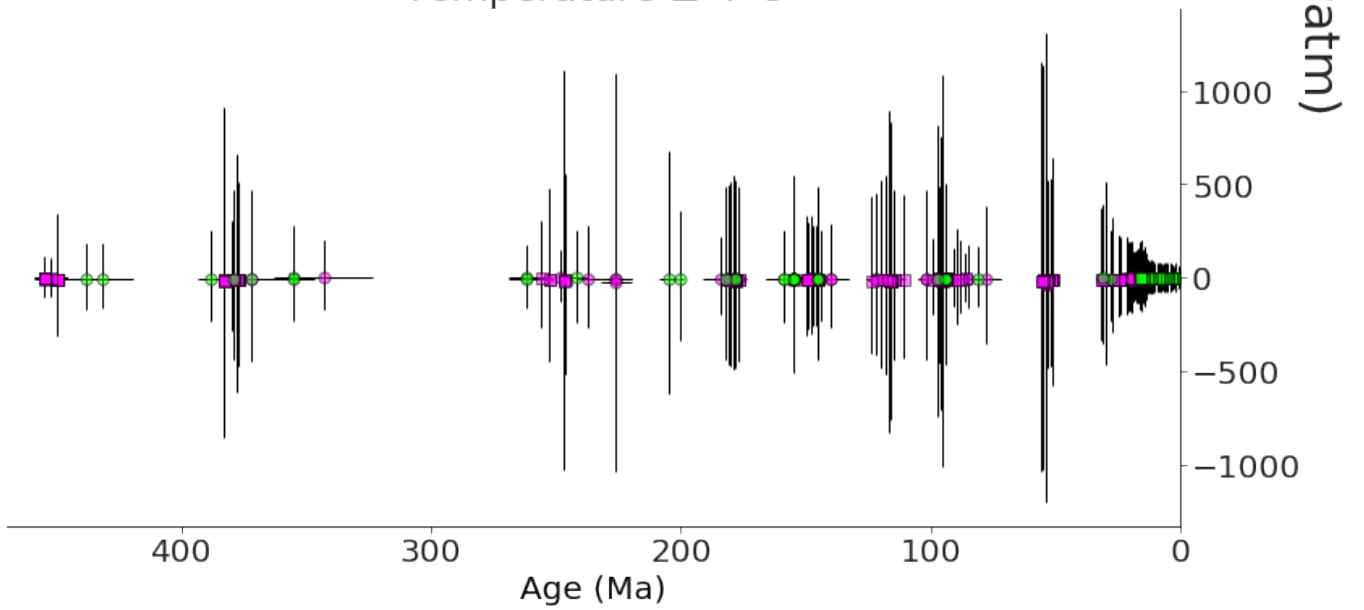

```
In [34]: figure(figsize=(13,20))
```

```
def plotit(r,r_baseline,frac=0.03):
    x=array(r['Ma'])
    xu=array(r['Ma_U'])
    xl=array(r['Ma_L'])

    idx_os_mo=r['index_other_oil']
    idx_os_ms=r['index_other_sedimentary']
    idx_cs_mo=r['index_current_oil']
    idx_cs_ms=r['index_current_sedimentary']

    val=(r['pCO2']-r_baseline['pCO2'])
    y=np.median(val,axis=1)
    yl=np.percentile(val,(100-errorbar_level)/2,axis=1)
    yu=np.percentile(val,100-(100-errorbar_level)/2,axis=1)

    xerr=array([x-xl,xu-x])
    yerr=array([y-yl,yu-y])

    alpha=0.5
    plot(x[idx_os_mo],y[idx_os_mo],'o',ms=7,color=color1,markeredgecolor='k',markeredgewidth=1,
        label='Previously Published, Oil',alpha=alpha)
    plot(x[idx_os_ms],y[idx_os_ms],'s',ms=7,color=color1,markeredgecolor='k',markeredgewidth=1,
        label='Previously Published, Sediment',alpha=alpha)
    plot(x[idx_cs_mo],y[idx_cs_mo],'o',ms=7,color=color2,markeredgecolor='k',markeredgewidth=1,
        label='Current Study, Oil',alpha=alpha)
    plot(x[idx_cs_ms],y[idx_cs_ms],'s',ms=7,color=color2,markeredgecolor='k',markeredgewidth=1,
        label='Current Study, Sediment',alpha=alpha)

    errorbar(x,y,xerr=xerr,yerr=yerr,fmt='none',lw=1,zorder=0,ecolor='k',capsize=0)
    ax=gca()
    ax.invert_xaxis()
    xlim([470,0])
    xlabel('Age (Ma)')

    ax.yaxis.set_label_position("right")
    ax.yaxis.set_ticks_position("right")

    #h=ylabel(r'% change in p ($^{o}/_{oo}$)',rotation=270,va='bottom',labelpad=20)
    #h=ylabel(r'$\delta^{13}C$ of Phytane ($^{f}/_{\%}/_{\%}$)',rotation=270,va='bottom',labelpad=20)

    grid('off')

    add_time_periods(frac=frac)

    #=====

    subplot(3,1,1)
    plotit(r_b,r_baseline,frac=0)
    #title('b s 60 kg tM-1')
    gca().set_xticklabels([])
    gca().set_xlabel('')
    gca().spines['left'].set_visible(False)
    gca().spines['top'].set_visible(False)

    subplot(3,1,2)
    plotit(r_f,r_baseline,frac=0)
    #title(r'$\epsilon_f$ s 1.5')
    gca().set_xticklabels([])
    gca().set_xlabel('')
    gca().spines['left'].set_visible(False)
    gca().spines['top'].set_visible(False)

    subplot(3,1,3)
    plotit(r_TC,r_baseline,frac=0)
    #title('Temperature s 4zC')
```

```
gca().spines['left'].set_visible(False)
gca().spines['top'].set_visible(False)

gcf().text(0.99, 0.5, r'Change in reconstructed pCO2 ( $\mu$ atm)', fontsize=30,
          ha='center', va='center', rotation=270)

if saveit:
    plt.savefig("../figures/Fig no titles absolute change pCO2 uncertainty associated with each
parameter.png",dpi=900, bbox_inches='tight')
```



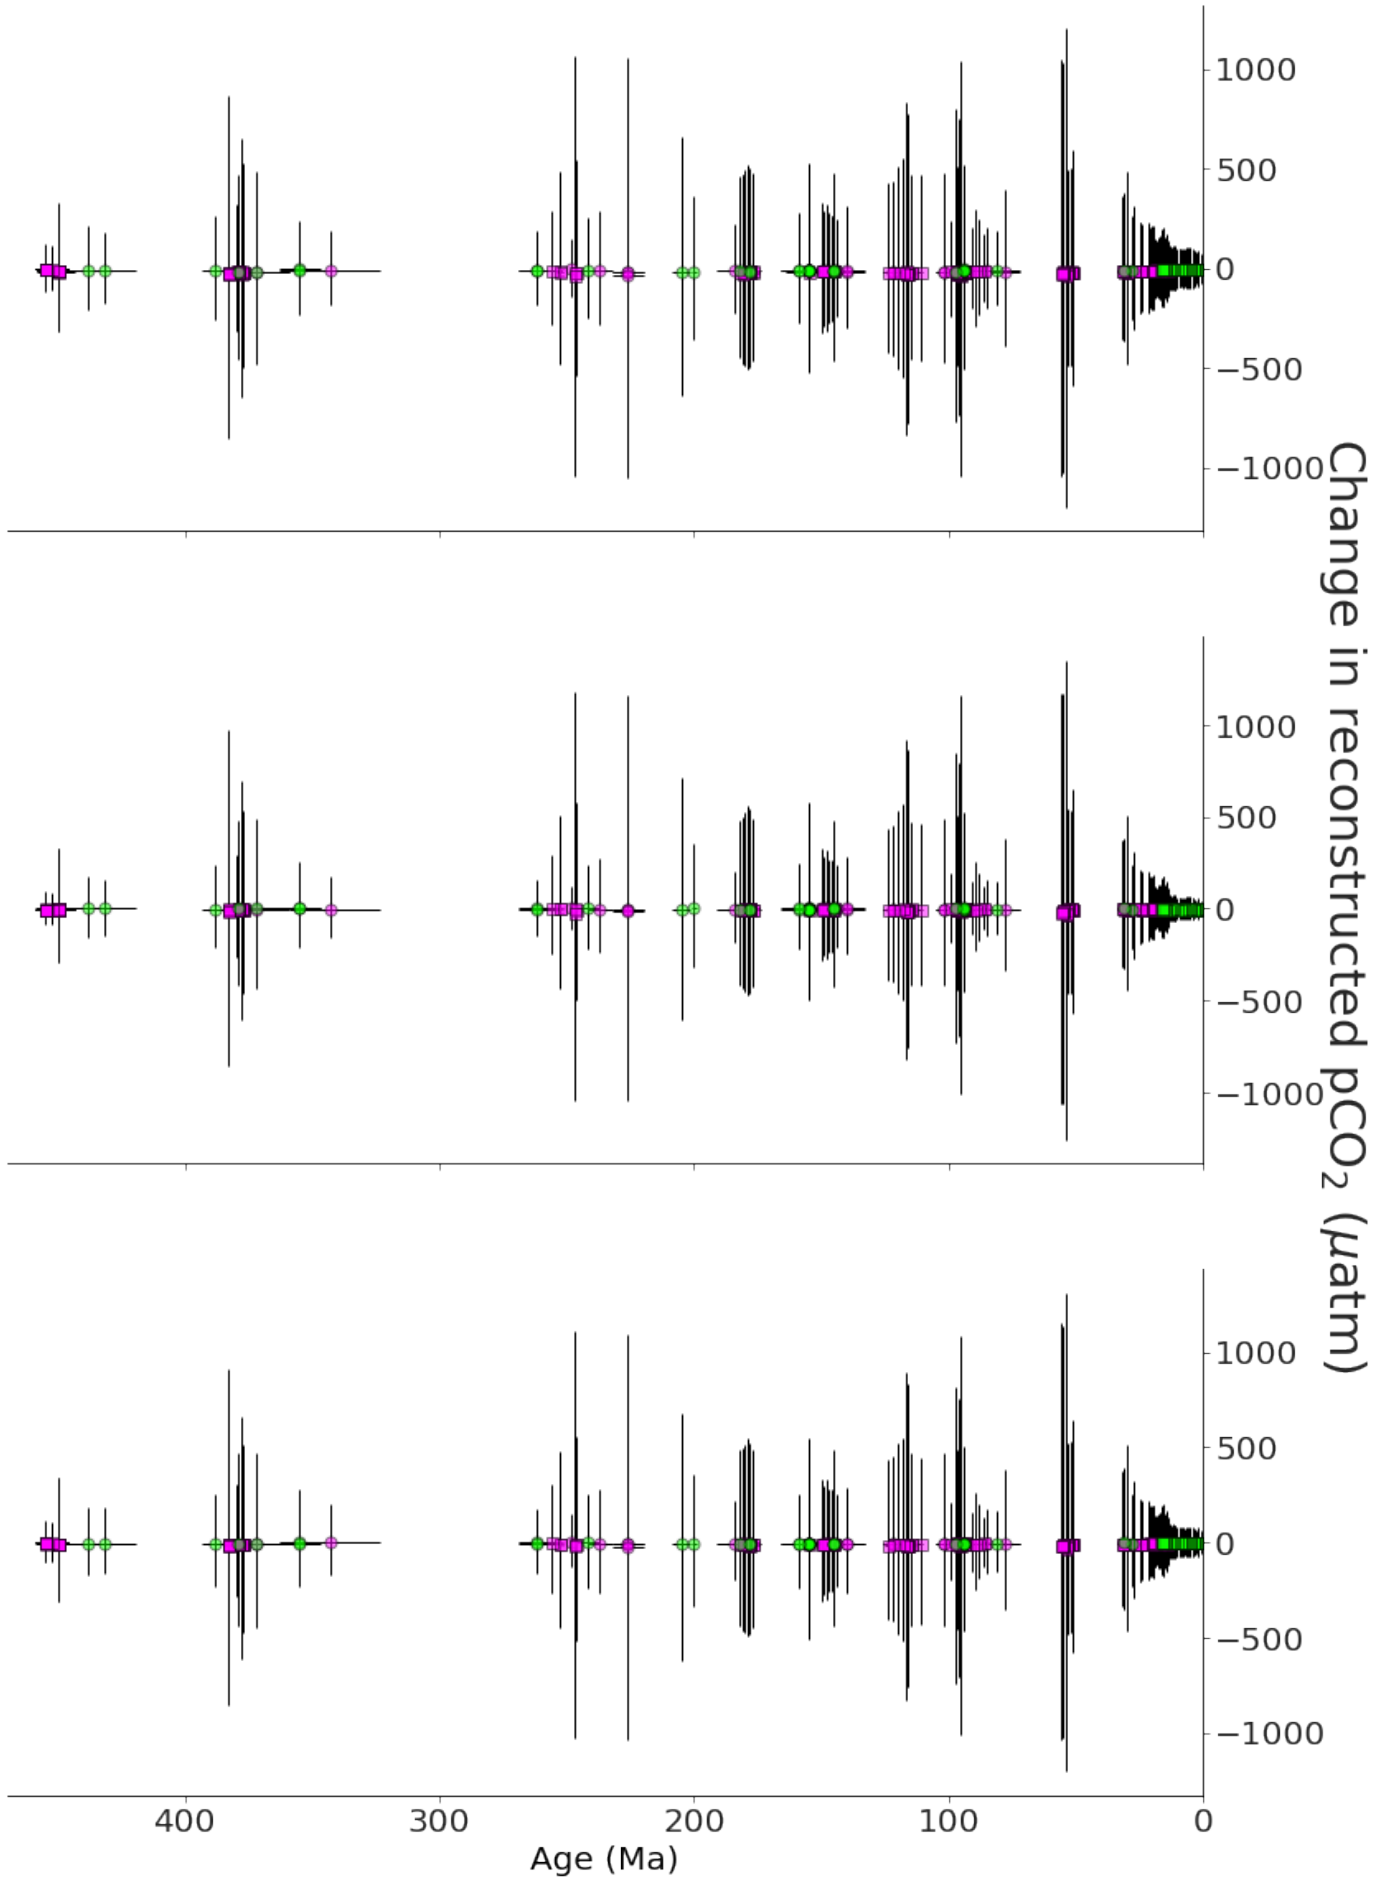

## 5.1 Discrete changes in parameters

```
In [35]: b_arr=[170-70,170-35,170+35,170+70]
f_arr=[26.5-1.5,26.5-0.75,26.5+0.75,26.5+1.5]
TC_arr=[-4,-2,2,4]
```

```
In [36]: %%time
r_baseline=get_results(fix_parameters=['b','f','TC'])

r_b=[]
for b in b_arr:
    r_b.append(get_results(fix_parameters=['f','TC'],b=b))

r_f=[]
for f in f_arr:
    r_f.append(get_results(fix_parameters=['b','TC'],f=f))

r_TC=[]
for TC in TC_arr:
    r_TC.append(get_results(fix_parameters=['f','b','TC'],TC=TC))
```

```
Setting b to 100
Setting b to 135
Setting b to 205
Setting b to 240
Setting f to 25.0
Setting f to 25.75
Setting f to 27.25
Setting f to 28.0
Setting TC to -4
Setting TC to -2
Setting TC to 2
Setting TC to 4
CPU times: user 2min 59s, sys: 19 s, total: 3min 18s
Wall time: 3min 22s
```

```
In [37]: figure(figsize=(13,20))
```

```
def plotit(r,r_baseline,frac=0.03,color=None):

    x=array(r['Ma'])
    xu=array(r['Ma_U'])
    xl=array(r['Ma_L'])

    idx_os_mo=r['index_other_oil']
    idx_os_ms=r['index_other_sedimentary']
    idx_cs_mo=r['index_current_oil']
    idx_cs_ms=r['index_current_sedimentary']

    val=(r['pCO2']-r_baseline['pCO2'])/r_baseline['pCO2']*100
    y=np.median(val,axis=1)
    yl=np.percentile(val,(100-errorbar_level)/2,axis=1)
    yu=np.percentile(val,100-(100-errorbar_level)/2,axis=1)

    xerr=array([x-xl,xu-x])
    yerr=array([y-yl,yu-y])

    alpha=0.8

    if color is None:
        plot(x[idx_os_mo],y[idx_os_mo],'o',ms=7,color=color1,markeredgecolor='k',markeredgewidth=1,
            label='Previously Published, Oil',alpha=alpha)
        plot(x[idx_os_ms],y[idx_os_ms],'s',ms=7,color=color1,markeredgecolor='k',markeredgewidth=1,
            label='Previously Published, Sediment',alpha=alpha)
        plot(x[idx_cs_mo],y[idx_cs_mo],'o',ms=7,color=color2,markeredgecolor='k',markeredgewidth=1,
```

```

        label='Current Study, Oil',alpha=alpha)
    plot(x[idx_cs_ms],y[idx_cs_ms], 's',ms=7,color=color2,markeredgecolor='k',markeredgewidth=1,
        label='Current Study, Sediment',alpha=alpha)
else:
    plot(x,y, 'o',ms=7,color=color,markeredgecolor='k',markeredgewidth=1,alpha=alpha)

#errorbar(x,y,xerr=xerr,yerr=yerr,fmt='none',lw=1,zorder=0,ecolor='k',capsize=0)
ax=gca()
ax.invert_xaxis()
xlim([470,0])
xlabel('Age (Ma)')

ax.yaxis.set_label_position("right")
ax.yaxis.set_ticks_position("right")

#h=ylabel(r'% change in p ($^{o}/_{oo}$)',rotation=270,va='bottom',labelpad=20)
#h=ylabel(r'$\delta^{13}C$ of Phytane ($^{\%}/_{\%}$)',rotation=270,va='bottom',labelpad=20)

grid('off')

add_time_periods(frac=frac)

#=====

subplot(3,1,1)

for r,c in zip(r_b,['magenta','cyan','yellow','green']):
    plotit(r,r_baseline,frac=0,color=c)

xl=gca().set_xlim()
plot(xl,[0,0], 'k:',linewidth=1)

LL=legend(['b=%d' % b for b in b_arr],
          loc='upper left',frameon=True,fontsize=14)
LL.get_frame().set_facecolor('#EEEEEE')

gca().set_xticklabels([])
gca().set_xlabel('')

gca().spines['left'].set_visible(False)
gca().spines['top'].set_visible(False)

subplot(3,1,2)

for r,c in zip(r_f,['magenta','cyan','yellow','green']):
    plotit(r,r_baseline,frac=0,color=c)

xl=gca().set_xlim()
plot(xl,[0,0], 'k:',linewidth=1)

gca().set_xticklabels([])
gca().set_xlabel('')

gca().spines['left'].set_visible(False)
gca().spines['top'].set_visible(False)

LL=legend(['f=%.1f' % f for f in f_arr],
          loc='best',frameon=True,fontsize=14)
LL.get_frame().set_facecolor('#EEEEEE')

subplot(3,1,3)

for r,c in zip(r_TC,['magenta','cyan','yellow','green']):
    if c=='green':
        plotit(r,r_baseline,frac=0.07,color=c)
    else:
        plotit(r,r_baseline,frac=0,color=c)

xl=gca().set_xlim()
plot(xl,[0,0], 'k:',linewidth=1)

```

```
gca().spines['left'].set_visible(False)
gca().spines['top'].set_visible(False)

LL=legend(['T=%d' % T for T in TC_arr],
          loc='upper left',frameon=True,fontsize=14)
LL.get_frame().set_facecolor('#EEEEEE')

gcf().text(0.99, 0.5, r'% change in reconstructed pCO2$', fontsize=30,
          ha='center', va='center', rotation=270)

if saveit:
    plt.savefig("../figures/Fig percent change pCO2 uncertainty associated with discrete values of each
parameter.png",dpi=900,bbox_inches='tight')
```

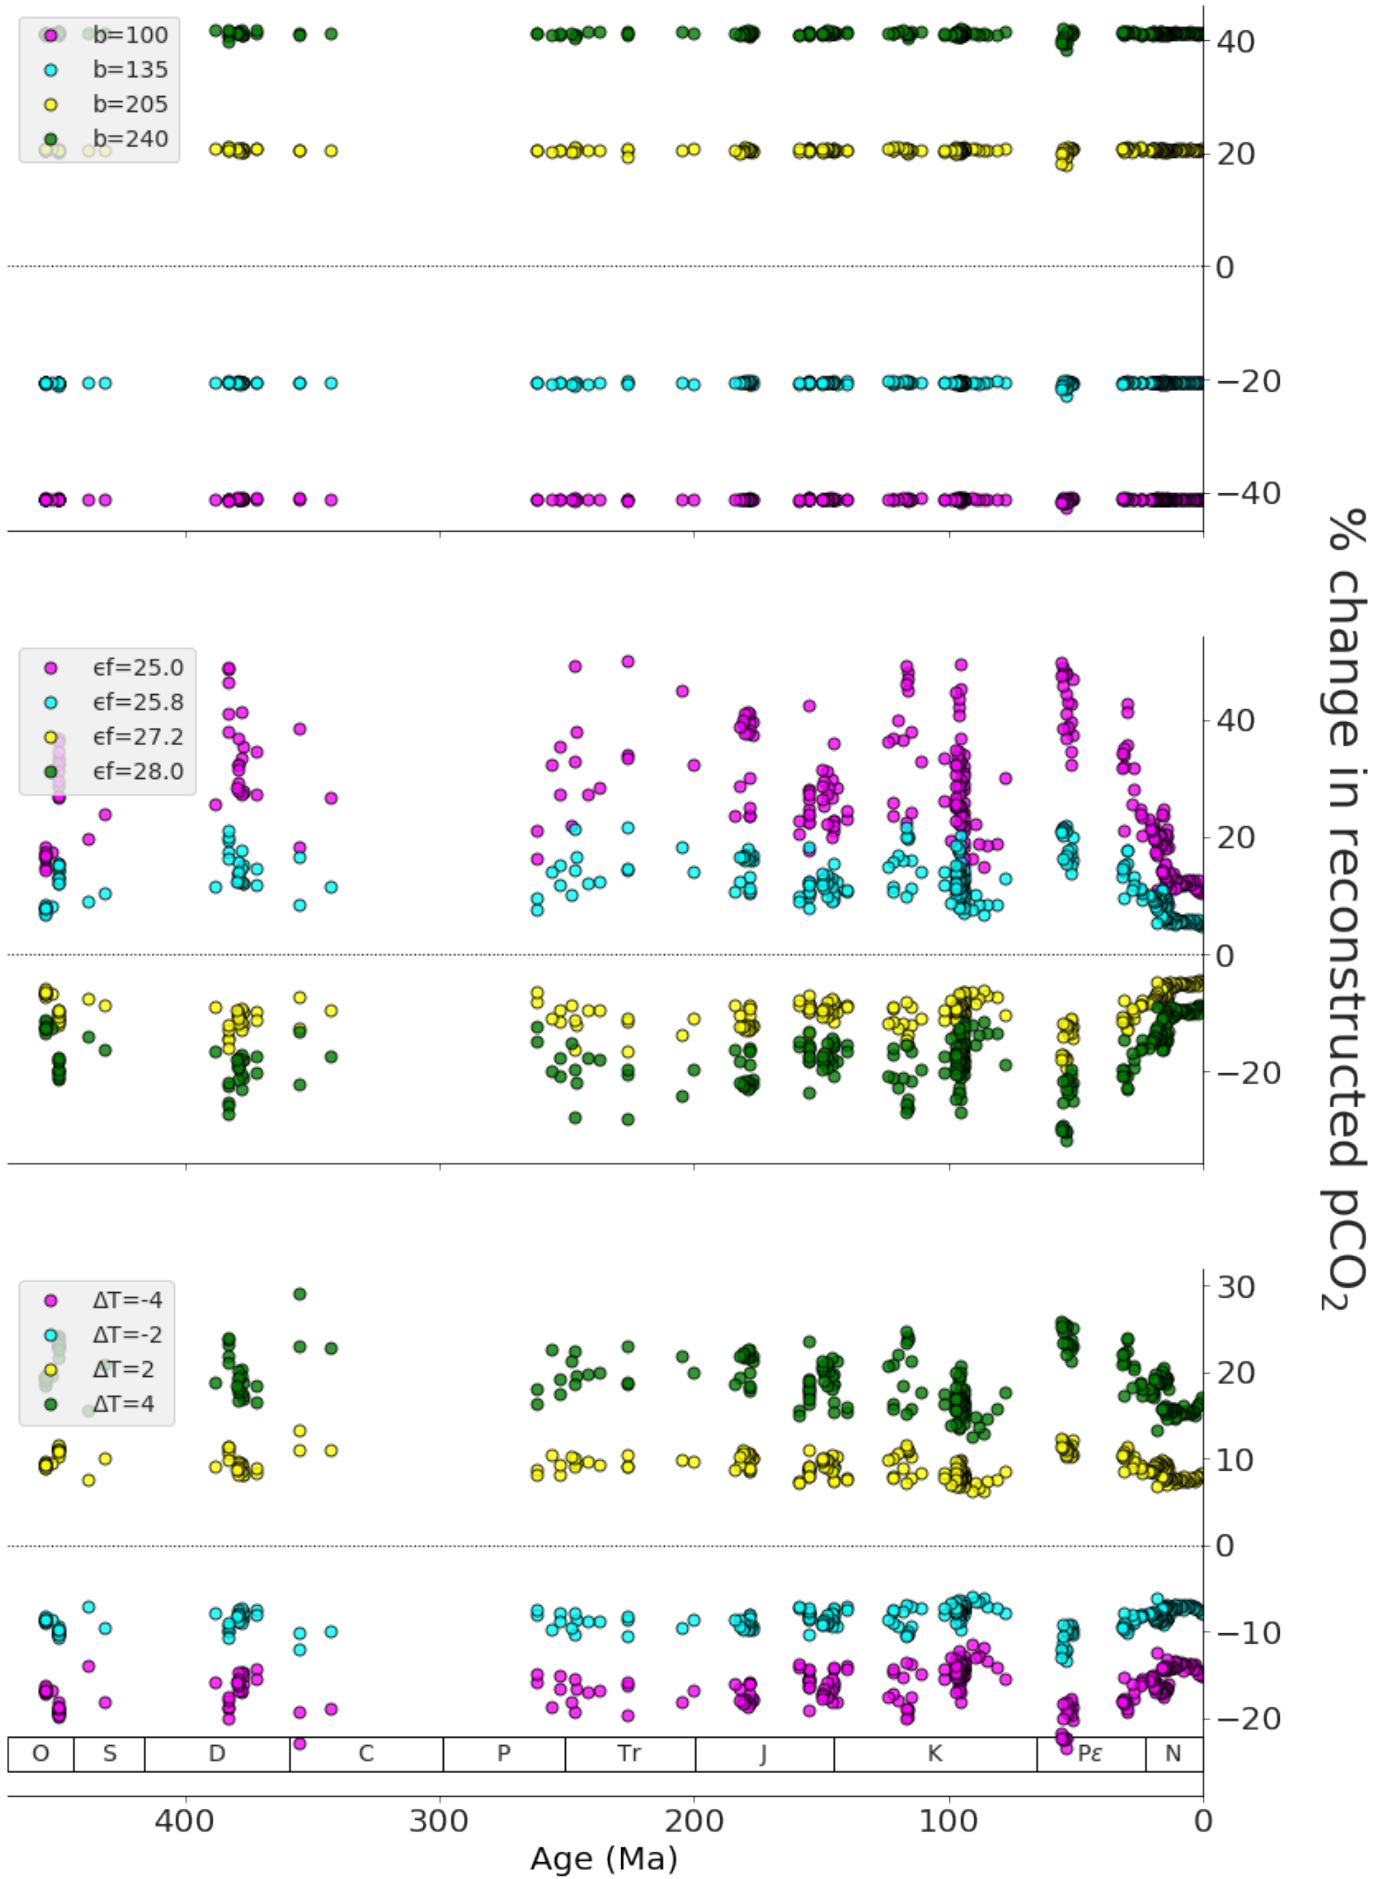

## 5.2 absolute values

In [38]: figure(figsize=(13,20))

```
def plotit(r,r_baseline,frac=0.03,color=None):

    x=array(r['Ma'])
    xu=array(r['Ma_U'])
    xl=array(r['Ma_L'])

    idx_os_mo=r['index_other_oil']
    idx_os_ms=r['index_other_sedimentary']
    idx_cs_mo=r['index_current_oil']
    idx_cs_ms=r['index_current_sedimentary']

    val=r['pCO2']
    y=np.median(val,axis=1)
    yl=np.percentile(val,(100-errorbar_level)/2,axis=1)
    yu=np.percentile(val,100-(100-errorbar_level)/2,axis=1)

    xerr=array([x-xl,xu-x])
    yerr=array([y-yl,yu-y])

    alpha=0.8

    if color is None:
        plot(x[idx_os_mo],y[idx_os_mo],'o',ms=7,color=color1,markeredgecolor='k',markeredgewidth=1,
            label='Previously Published, Oil',alpha=alpha)
        plot(x[idx_os_ms],y[idx_os_ms],'s',ms=7,color=color1,markeredgecolor='k',markeredgewidth=1,
            label='Previously Published, Sediment',alpha=alpha)
        plot(x[idx_cs_mo],y[idx_cs_mo],'o',ms=7,color=color2,markeredgecolor='k',markeredgewidth=1,
            label='Current Study, Oil',alpha=alpha)
        plot(x[idx_cs_ms],y[idx_cs_ms],'s',ms=7,color=color2,markeredgecolor='k',markeredgewidth=1,
            label='Current Study, Sediment',alpha=alpha)
    else:
        plot(x,y,'o',ms=7,color=color,markeredgecolor='k',markeredgewidth=1,alpha=alpha)

    #errorbar(x,y,xerr=xerr,yerr=yerr,fmt='none',lw=1,zorder=0,ecolor='k',capsize=0)
    ax=gca()
    ax.invert_xaxis()
    xlim([470,0])
    xlabel('Age (Ma)')

    ax.yaxis.set_label_position("right")
    ax.yaxis.set_ticks_position("right")

    #h=ylabel(r'% change in p ($^{o}/_{oo}$)',rotation=270,va='bottom',labelpad=20)
    #h=ylabel(r'$\delta^{13}C$ of Phytane ($^{o}/_{\%}/_{\%}$)',rotation=270,va='bottom',labelpad=20)

    grid('off')

    add_time_periods(frac=frac)

    #=====

subplot(3,1,1)

for r,c in zip(r_b,['magenta','cyan','yellow','green']):
    plotit(r,r_baseline,frac=0,color=c)

xl=gca().set_xlim()
plot(xl,[0,0],'k:',linewidth=1)

LL=legend(['b=%d' % b for b in b_arr],
    loc='upper left',frameon=True,fontsize=14)
LL.get_frame().set_facecolor('#EEEEEE')
```

```

gca().set_xticklabels([])
gca().set_xlabel('')

gca().spines['left'].set_visible(False)
gca().spines['top'].set_visible(False)

subplot(3,1,2)

for r,c in zip(r_f,['magenta','cyan','yellow','green']):
    plotit(r,r_baseline,frac=0,color=c)

xl=gca().set_xlim()
plot(xl,[0,0],'k:',linewidth=1)

gca().set_xticklabels([])
gca().set_xlabel('')

gca().spines['left'].set_visible(False)
gca().spines['top'].set_visible(False)

LL=legend(['f=%.1f' % f for f in f_arr],
          loc='best',frameon=True,fontsize=14)
LL.get_frame().set_facecolor('#EEEEEE')

subplot(3,1,3)

for r,c in zip(r_TC,['magenta','cyan','yellow','green']):
    if c=='green':
        plotit(r,r_baseline,frac=0.07,color=c)
    else:
        plotit(r,r_baseline,frac=0,color=c)

xl=gca().set_xlim()
plot(xl,[0,0],'k:',linewidth=1)

gca().spines['left'].set_visible(False)
gca().spines['top'].set_visible(False)

LL=legend(['T=%d' % T for T in TC_arr],
          loc='upper left',frameon=True,fontsize=14)
LL.get_frame().set_facecolor('#EEEEEE')

gcf().text(0.99, 0.5, r'Reconstructed pCO2', fontsize=30,
          ha='center', va='center', rotation=270)

if saveit:
    plt.savefig("../figures/Fig pCO2 uncertainty associated with discrete values of each
parameter.png",dpi=900,bbbox_inches='tight')

```

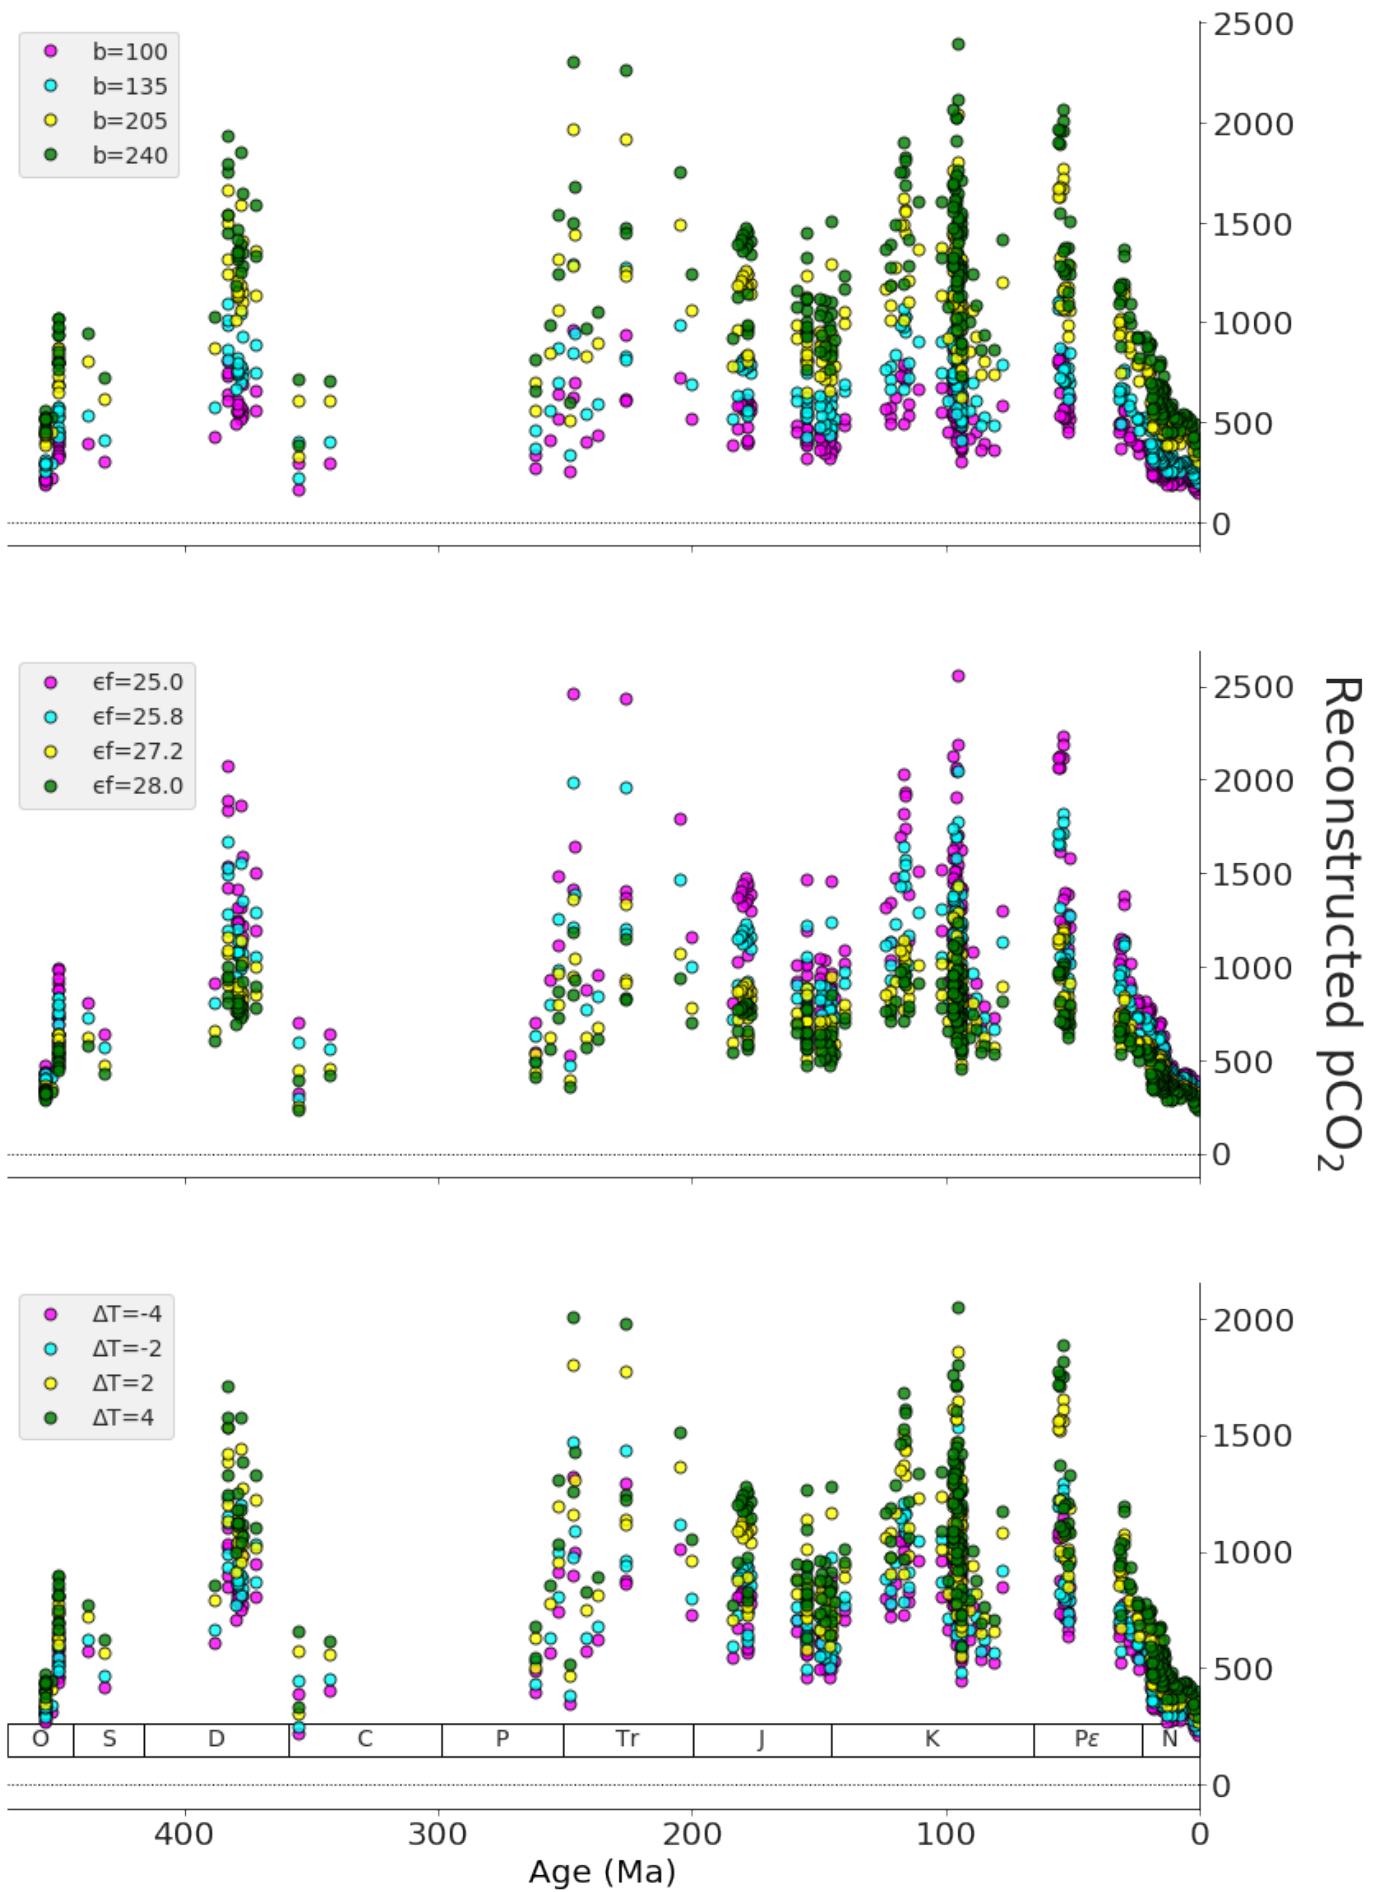

Supplement: aat4556_Code_S1.pdf [file aat4556_Code_S1.pdf]
