# Supplementary material for: Molecular fossils from phytoplankton reveal secular Pco2 trend over the Phanerozoic
Source: PubMed Central journal article supplement — Sci Adv. 2018 Nov 28;4(11):eaat4556. doi: 10.1126/sciadv.aat4556 (PMC6261654; doi:10.1126/sciadv.aat4556), 2018-11-28
Supplement: aat4556_SM.pdf [file aat4556_SM.pdf]

## Supplementary Materials for

### Molecular fossils from phytoplankton reveal secular $PCO_2$ trend over the Phanerozoic

Caitlyn R. Witkowski\*, Johan W. H. Weijers, Brian Blais, Stefan Schouten, Jaap S. Sinninghe Damsté

\*Corresponding author. Email: caitlyn.witkowski@nioz.nl

Published 28 November 2018, *Sci. Adv.* **4**, eaat4556 (2018)

DOI: 10.1126/sciadv.aat4556

#### The PDF file includes:

Supplementary Materials and Methods

Supplementary Text

Fig. S1. Isotopic offset between biomass and phytol.

Fig. S2. Trends from reported  $\delta^{13}C_{\text{phytane}}$  data to  $PCO_2$ .

Fig. S3. Uncertainties associated with equation parameters.

Fig. S4.  $PCO_2$  from phytane over the Phanerozoic in time slices.

Table S1. Isotopic offset between biomass and phytol.

Table S2. Estimating  $b$  from marine OM in modern-day oceans.

Table S3. Estimating  $b$  from phytol across an equatorial Pacific Ocean transect.

Legend for code S1

Legend for data S1

References (52–96)

#### Other Supplementary Material for this manuscript includes the following:

(available at [advances.sciencemag.org/cgi/content/full/4/11/eaat4556/DC1](https://advances.sciencemag.org/cgi/content/full/4/11/eaat4556/DC1))

Code S1 (.pdf format). Python code used for Monte Carlo simulations to calculate uncertainty for  $PCO_2$  estimations by considering every parameter involved in the equations.

Data S1 (Microsoft Excel format). All data used to reconstruct  $PCO_2$  from the  $\delta^{13}C_{\text{phytane}}$ .

## Supplementary Materials and Methods

Marine oils were used to reconstruct periods where there was less sediment records available and make up 13% of our total data set. Marine oils were selected based on empirical, qualitative examination of the oil composition as tested by GC-MS. For example, strong indicators for marine conditions include the presence of C<sub>30</sub> steranes and a lower pristane/phytane ratio (<1.5). In contrast, a high pristane/phytane ratio (>2) reflects terrestrial input. Strong indicators for terrestrial conditions include a higher C<sub>29</sub> sterane content relative to other steranes, a higher C<sub>19</sub> tricyclic content, a higher methylcyclohexane content, a low sulfur content, and sometimes odd-over-even n-alkane distribution (50). Other typical terrestrial biomarkers include oleanane, taraxastane, and bicadinanes, while tetracyclic polyprenoids indicate lacustrine environments.

## Supplementary Text

### *Uncertainty analysis for calculating $\epsilon_p$*

As described in the main text, there are several calculations to derive pCO<sub>2</sub> estimations from the  $\delta^{13}\text{C}$  of phytane. In order to constrain the uncertainty in our pCO<sub>2</sub> estimations, Monte Carlo simulations were run using the uncertainty associated with each individual equation parameter. The result of these simulations are probability distributions for each pCO<sub>2</sub> estimation given the input data and standard deviation on the input data. Here, we will describe the step-by-step equations needed for pCO<sub>2</sub> reconstruction and the impact of each individual equation parameter on the final outcome.

To calculate stable carbon isotopic fractionation associated with CO<sub>2</sub> fixation ( $\epsilon_p$ ), we use

$$\epsilon_p = 1000 \cdot [(\delta_d + 1000) / (\delta_p + 1000) - 1] \quad (1)$$

where  $\delta_p$  is the  $\delta^{13}\text{C}$  of primary photosynthate and where  $\delta_d$  is the  $\delta^{13}\text{C}$  of aqueous carbon dioxide (CO<sub>2(aq)</sub>) in the photic zone (6, 7, 52).

$\delta_p$  is estimated using:

$$\delta_p = \delta^{13}\text{C of phytane} + \Delta\delta \quad (2)$$

where  $\delta^{13}\text{C}$  of phytane is our raw data and  $\Delta\delta$  represents the stable carbon isotopic offset between the biomarker phytane and biomass.  $\delta^{13}\text{C}$  of phytane is assigned a standard deviation of  $\pm 0.5$  ‰ uniform distribution based on the maximum uncertainty associated with the IRMS instrumentation, although the error on measurements is general much lower (ca.  $\pm 0.1$  ‰) on samples run in triplicate. The  $\delta^{13}\text{C}$  of phytane  $\pm 0.5$  ‰ uniform distribution may cause ca. 1.5% change in the final calculated  $\epsilon_p$ .

To estimate the  $\Delta\delta$  for phytane, laboratory culture experiments in which the  $\delta^{13}\text{C}$  values for both algal biomass and phytol, the precursor of phytane, were compiled in Fig. S1 and Table S1 (references therein). Because the conversion of phytol to phytane does not involve the breaking of carbon bonds, there is likely a negligible difference in their isotopic composition due to diagenesis, unlike phytol's other diagenetic products such as pristane, which may be slightly depleted from the loss of a carbon atom (Schouten et al., 2008). Fig. S1 shows the average  $\Delta\delta$  with standard deviation for each species, as well as the overall average for the dataset of 3.5‰ shown by the thin gray line with one standard deviation shaded in light gray ( $\pm 1.3$ ‰ standard

deviation) and two in dark gray. The data for *Alexandrium tamarensense* was not included as it is a significant outlier ( $P < 0.05$ ) using the Grubb's outlier test, with a Z value of 2.84 where the critical value is 2.78. The  $\Delta\delta$  for phytane  $\pm 1.3$  ‰ standard deviation may cause ca. 3.5% change in  $\epsilon_p$ . In other words, the uncertainty in this parameter may cause the final calculated  $\epsilon_p$  to vary by  $\pm 0.7$  ‰. All data and references can be found in Table S1.

To estimate  $\delta_d$ , the  $\delta^{13}\text{C}$  of aqueous carbon dioxide ( $\text{CO}_{2(\text{aq})}$ ) in the photic zone, we use the  $\delta^{13}\text{C}$  of planktonic foraminifera:

$$\delta_d = \delta^{13}\text{C of planktonic foraminifera} - 1 + \epsilon_{b(a)} \quad (3)$$

where  $\delta^{13}\text{C}$  of carbonate of planktonic foraminifera (see references within Dataset S1) and subtraction of 1 refers to the nearly constant  $\delta^{13}\text{C}$  difference in calcite ( $\text{CaCO}_3$ ) from bicarbonate ( $\text{HCO}_3^-$ ) due to abiotic kinetic fractionation, which consequently effects the  $\delta^{13}\text{C}$  between foraminiferal calcite relative to DIC (53).  $\epsilon_{b(a)}$  describes the carbon isotopic fractionation of  $\text{CO}_{2(\text{aq})}$  with respect to  $\text{HCO}_3^-$ .

The  $\delta^{13}\text{C}$  of carbonate of planktonic foraminifera was preferentially used from the same site as phytane; in the cases where this data was not available, data from nearby sites were used; where that was not available, the long term global average of  $\delta^{13}\text{C}$  of marine carbonate as calculated by Hayes *et al.* (8) was used. The instrumental error for  $\delta^{13}\text{C}$  of carbonate is  $\pm 0.2$  ‰ uniform distribution, although the error on measurements is generally much lower (ca.  $\pm 0.01$  ‰) based on samples run in triplicate. However, because some estimates are obtained from the global average (8), we expand this standard deviation by twofold to  $\pm 0.4$  ‰ uniform distribution. The  $\delta^{13}\text{C}$  of planktonic foraminifera  $\pm 0.4$  ‰ uniform distribution may cause ca. 0.5 ‰ change in  $\epsilon_p$ , resulting  $\pm 0.2$  ‰ change to the final calculated  $\epsilon_p$ .

$\epsilon_{b(a)}$  describes the carbon isotopic fractionation of  $\text{CO}_{2(\text{aq})}$  with respect to  $\text{HCO}_3^-$ , which depends on temperature, and which can be calculated using the equation:

$$\epsilon_{b(a)} = 24.12 - 9866/T \quad (4)$$

where T is temperature in Kelvin (16). Temperatures were estimated from sea surface temperature proxies reported for the same site. Where SST data for the site is unavailable, temperature was estimated by adjusting the modern site for its paleolatitude (using [www.paleolatitude.org](http://www.paleolatitude.org)), finding the SST at that location (e.g. [seatemperature.org](http://seatemperature.org)), and then correcting the present-day SST for global temporal SST anomalies e.g. (30, 31) for 0-56 Ma; (32) for 65-455 Ma. References for temperature estimations are included in Dataset S1. SST is  $\pm 4^\circ\text{C}$  standard deviation in our uncertainty calculations. Although SST proxies generally have a lower uncertainty than  $4^\circ\text{C}$ , we expanded this uncertainty due to the occasional lack of local data and due to the large timespan, i.e. uncertainties in temperature estimates substantially increase with deep time due to a lack of accurate proxies. The uncertainty of  $\pm 4^\circ\text{C}$  standard deviation may cause ca. 1.2 ‰ change in  $\epsilon_p$ , equivalent to the final calculated  $\epsilon_p \pm 0.2$  ‰.

#### *Uncertainty analysis for estimating $p\text{CO}_2$*

To estimate the dissolved carbon dioxide ( $\text{CO}_{2[\text{aq}]}$ ) from  $\epsilon_p$  we use

$$\text{CO}_{2[\text{aq}]} = b / (\epsilon_f - \epsilon_p) \quad (5)$$

a relationship developed by Hayes (17) and Francois *et al.* (39) and which is a modification of

the relationship developed for higher plants from Farquhar *et al.* (4, 40).

The term  $b$  accounts for all factors that may influence isotopic fractionation in addition to carbon dioxide, equivalent to environmental ( $C_e$ ) versus intracellular ( $C_i$ ) concentrations of  $\text{CO}_{2[\text{aq}]}$  as related to isotopic fractionation due to  $\text{CO}_2$ -fixation ( $\epsilon_f$ ) versus due to diffusive transport ( $\epsilon_t$ ), expressed as  $(C_e - C_i) (\epsilon_f - \epsilon_t)$  (54). Cell carbon allocation and bicarbonate uptake, as well as growth rate and cell geometry, influence carbon acquisition into the cell e.g. (9) and therefore the term  $b$ . Because this is the first study to apply phytane towards secular trends in  $\text{pCO}_2$ , there have not yet been laboratory cultures and environmental samples to constrain phytane in regards to  $b$ . Modern environmental samples suggest a correlation of  $b$  values for alkenones with phosphate concentrations where  $b = (118.52 [\text{PO}_4^{3-}]) + 84.07$  when  $\epsilon_f$  is 25‰ (35, 41, 42, 55). Thus, within normal environmental ranges for  $\text{PO}_4^{3-}$  (~0-2  $\mu\text{M}$ ),  $b$  for alkenone-producers ranges from approximately 70-240 ‰  $\text{kg } \mu\text{M}^{-1}$  with a mean of  $165 \pm 53$  standard deviation. Because phytane is coming from the entire phytoplankton community, we also calculated  $b$  from the  $\delta^{13}\text{C}$  of total organic matter in diverse modern open marine sediments (Table S2), which yielded an average  $b$  of  $168 \pm 43$  ‰  $\text{kg } \mu\text{M}^{-1}$  standard deviation. Marine organic matter, just like phytol/phytane, is also predominantly derived from diverse phytoplanktonic sources, although it likely contains contributions from non-photosynthetic algae, bacteria and archaea, in addition to smaller amounts of continental organic matter. Nevertheless, the average  $b$  of 168 ‰  $\text{kg } \mu\text{M}^{-1}$  is identical to that calculated using alkenones, indicating that this estimation of  $b$  can also be applied to a common phytoplanktonic biomarker. Hence, for our calculations, a mean value of 170 ‰  $\text{kg } \mu\text{M}^{-1}$  is used for  $b$ , consistent with the  $b$  used in previous phytane-based  $\text{pCO}_2$  estimations (22, 23). In further consideration of increased uncertainty over the geologic record, we conservatively expand the  $\pm 43$  ‰  $\text{kg } \mu\text{M}^{-1}$  standard deviation up to  $\pm 60$  ‰  $\text{kg } \mu\text{M}^{-1}$  standard deviation. This range is further supported by Bidigare *et al.* (42) where the  $\delta^{13}\text{C}$  of phytol was measured the equatorial Pacific Ocean (from 3°N to 2°S, 140°W). In Table S3, we calculate  $b$  from the reported  $\delta^{13}\text{C}$  of phytol suspended particulate matter (and hence derived from a variety of phytoplankton species), which shows minor variability over the 500 km transect. The average  $b$  for this very low-productivity region ( $b = 107 \pm 5$ ) is indeed at the low end of our window for  $b$  ( $170 \pm 60$ ). We assume  $b$  is a constant over time as we have no means of constraining how  $b$  can vary with time. The uncertainty analysis shows that changes in  $b$  shifts absolute estimates of  $\text{pCO}_2$  but not the overall trend. Our uncertainty analysis shows that a 1% change in  $b$  yields a 1% change in  $\text{pCO}_2$  (Fig. S3A).

$\epsilon_f$  is the maximum isotopic fractionation associated with photosynthetic carbon fixation, generally ranging from 25–28‰ for algae in modern oceans and laboratory experiments (43, 44). Because phytane is the average of the entire phytoplankton community, it is not possible to know the exact percentage of species contributions to the phytane pool. Thus, a constant average fractionation from laboratory cultures of 26.5‰ was used for the entire dataset. Our observed  $\epsilon_p$  which does not surpass 25‰ suggests that there have not been dramatic changes in the isotopic fractionation due to evolutionary changes in Rubisco, which may occur due to environmental stressors e.g. low environmental carbon (38). Because we are using the averaged maximum fractionation from all phytoplankton species and because our data suggests there were no major evolutionary changes in this fractionation,  $\epsilon_f$  is likely relatively constant. Using the full range of 25–28‰, we explore  $\pm 1.5$ ‰ uniform distribution uncertainty on the effect of  $\epsilon_f$  on the resulting  $\text{pCO}_2$  estimation. In Fig. S3,  $\epsilon_f$  has a varying influence on  $\text{pCO}_2$  estimations, averaging around a  $\pm 10\%$  change in  $\text{pCO}_2$  estimation for periods of lower  $\text{pCO}_2$  to averaging around -15/+30% for most of the Phanerozoic. There is a positive bias, where there is much more uncertainty in the

positive direction (maximum 80%) than in the negative (maximum -30%). This positive bias is caused when  $\epsilon_f$  and  $\epsilon_p$  approach one another, as seen during the Paleocene/Eocene transition (Fig. S3B).

To estimate the atmospheric concentration of carbon dioxide from the  $\text{CO}_{2[\text{aq}]}$  we use:

$$p\text{CO}_2 = [\text{CO}_{2(\text{aq})}] / K_0 \quad (6)$$

based on Henry's Law, where the solubility constant  $K_0$ , expressed in M/atm, is:

$$\ln K_0 = A_1 + A_2(100/T) + A_3 \ln(T/100) + S\text{‰} [B_1 + B_2(T/100) + B_3(T/100)^2] \quad (7)$$

where  $A$  and  $B$  are constants,  $T$  is the temperature in Kelvin, and  $S\text{‰}$  is salinity in ‰ (56)(Weiss, 1974). The constants used here are  $A_{1-3}$  (-58.0931, 90.5069, 22.2940) and  $B_{1-3}$  (0.02777, -0.02589, 0.00506), respectively (45). Because paleosalinity proxies are very limited, we here set a constant salinity of  $34 \text{‰} \pm 2 \text{‰}$  standard deviation. We include a second SST uncertainty of  $\pm 4^\circ\text{C}$  standard deviation (in addition to the  $\epsilon_p$  estimations) in our estimations for  $p\text{CO}_2$ . For cooler periods, such as the Miocene towards today, this  $\pm 4^\circ\text{C}$  standard deviation results in a 10% potential influence on reconstructed  $p\text{CO}_2$ . For extremely warm periods, there is greater uncertainty; on average, uncertainty is ca. 20% with the highest uncertainty of 40% shown in the case of the Paleocene/Eocene transition.

All data used for these calculations are in Dataset S1 (8, 22, 23, 25, 29-32, 57-95).

#### *Impact of $\text{O}_2$ on isotopic fractionation*

Because Rubisco has the dual carboxylase-oxygenase function, some studies have speculated that the ratio of  $\text{O}_2$  to  $\text{CO}_2$  concentrations in the atmosphere may have an influence on a isotopic discrimination, e.g. (96). This may be a potential caveat for reconstructing  $p\text{CO}_2$  during periods within earth history with substantially elevated atmospheric  $\text{O}_2$  concentrations. However, it should also be noted that Berner et al. (96) based this discussion on four data points from a single species of diatom (though diatoms never experienced extremely high oxygen concentrations in their evolutionary history). Furthermore, the diatom was cultured under two simultaneously varying parameters,  $\text{O}_2$  and  $\text{CO}_2$ . After the proposed model in the paper (96) had been applied to the data, there is only a  $\leq 1\text{‰}$  shift in the resulting fractionation. Such an effect is relatively minor compared to other assumptions in the overall approach (e.g., estimation of  $b$ ).

Furthermore, our record only contains a few data points from the period of presumed elevated atmospheric  $\text{O}_2$  concentrations (ca. 240-350 Ma) and there is no apparent match between  $\epsilon_p$  and periods of elevated  $\text{O}_2$  concentrations.

(Ref 32, 51-96)

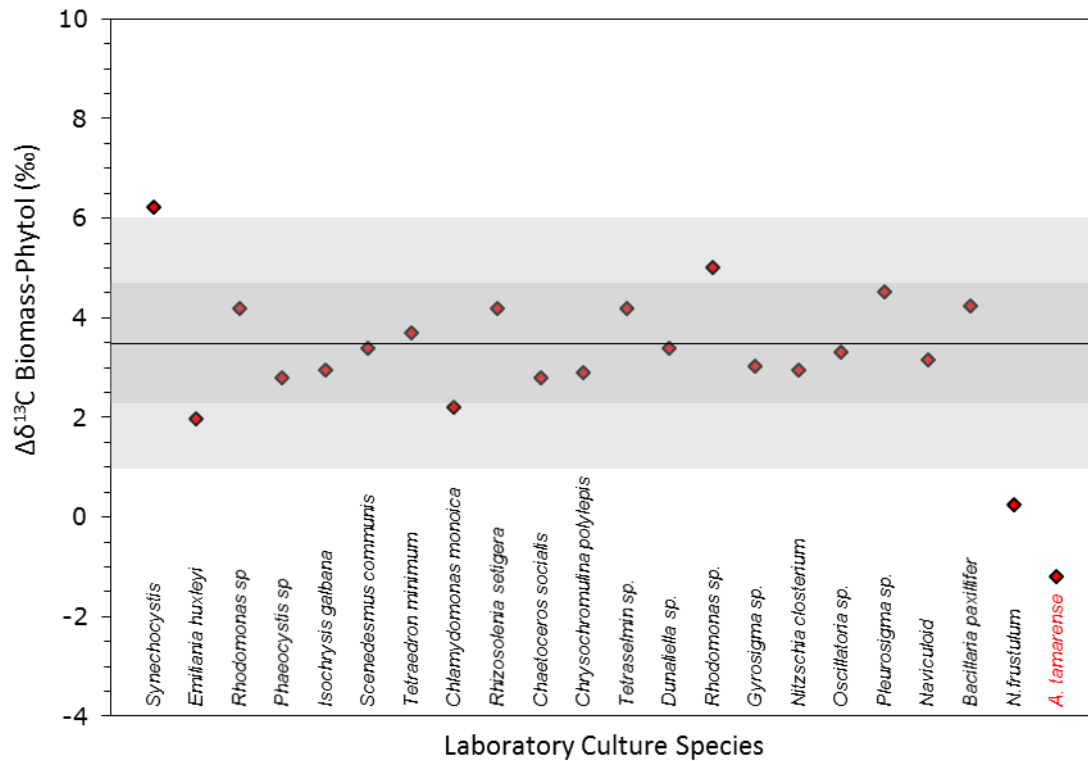

**Fig. S1. Isotopic offset between biomass and phytol.** On the x-axis are laboratory culture experiments from individual species of phytoplankton. The black line represents the mean, the dark band is the first standard deviation, and the light band is the second standard deviation for the entire set of phytoplankton. All references can be found in Table S1.

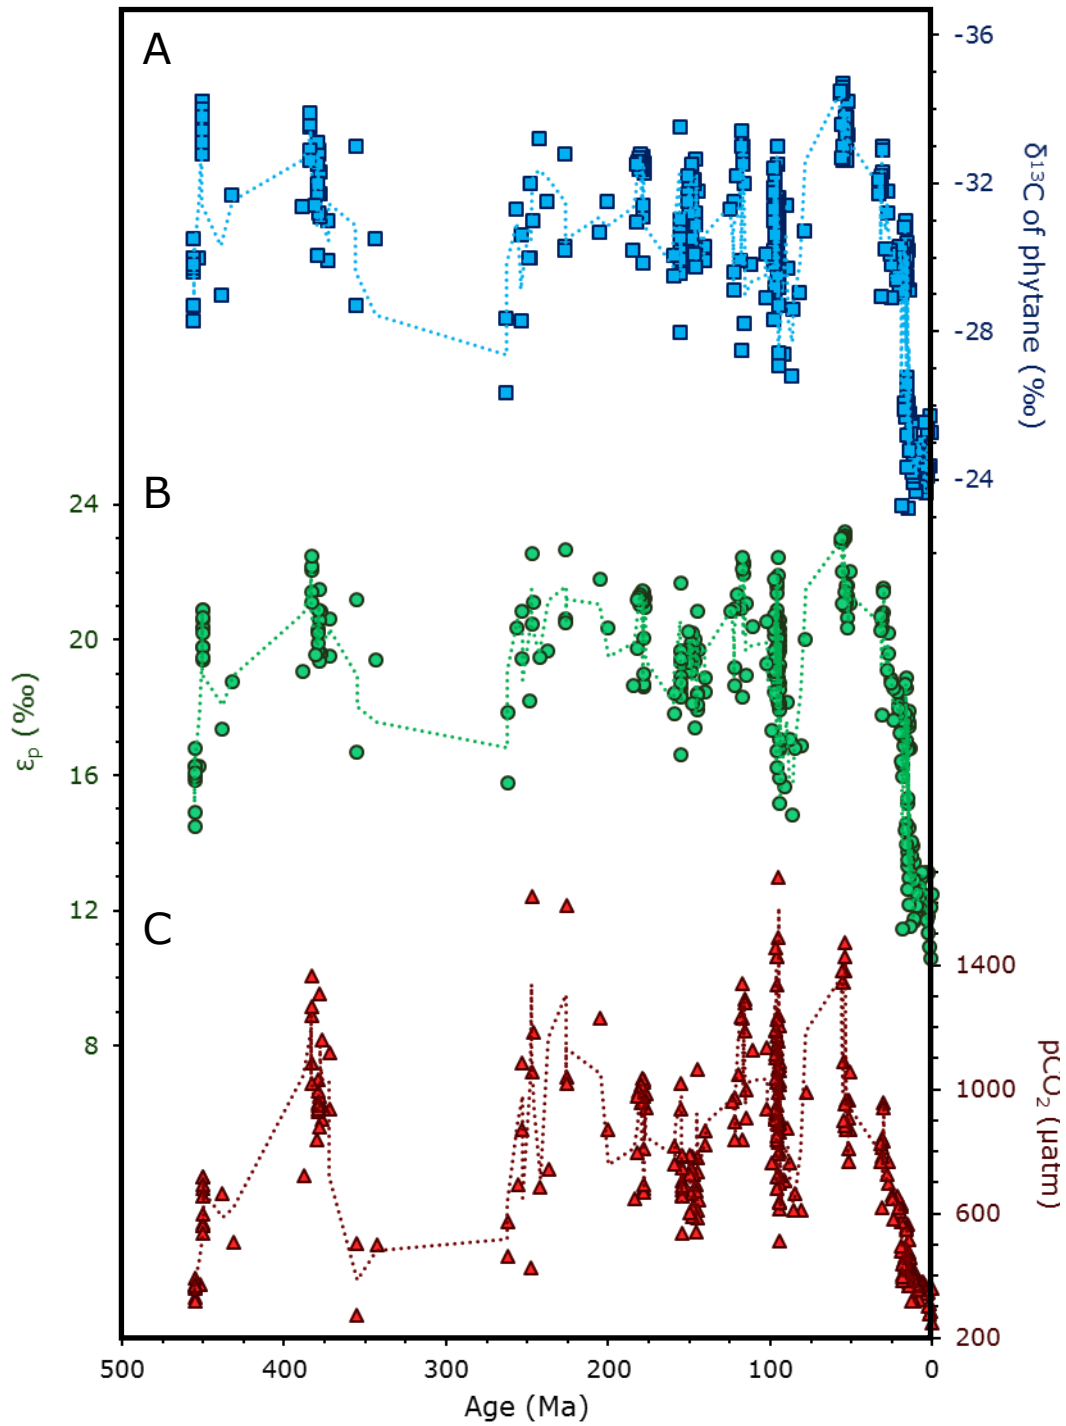

**Fig. S2. Trends from reported  $\delta^{13}\text{C}_{\text{phytane}}$  data to  $p\text{CO}_2$ .** Phytane data over the Phanerozoic for A)  $\delta^{13}\text{C}$ , B) calculated  $\epsilon_p$ , and C) estimated  $p\text{CO}_2$ .

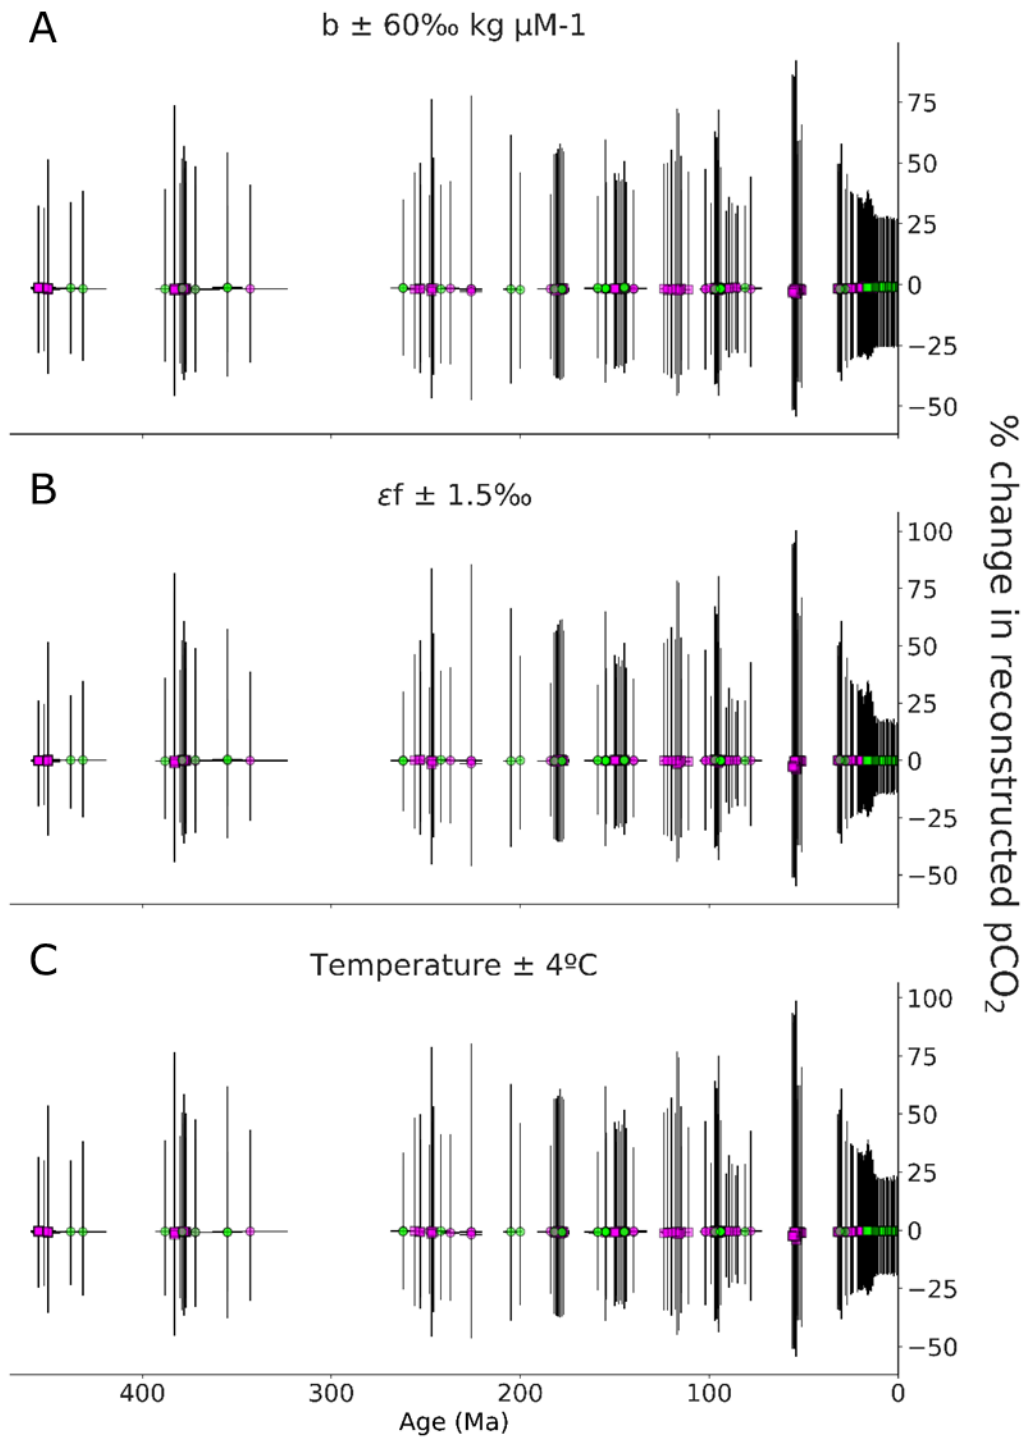

**Fig. S3. Uncertainties associated with equation parameters.** Percentage change in reconstructed pCO<sub>2</sub> given the following uncertainties within each equation parameter, A)  $b \pm 60\text{‰ kg } \mu\text{M}^{-1}$  standard deviation, B)  $\epsilon_f \pm 1.5\text{‰}$  uniform distribution, and C) temperature  $\pm 4^\circ\text{C}$  standard deviation.



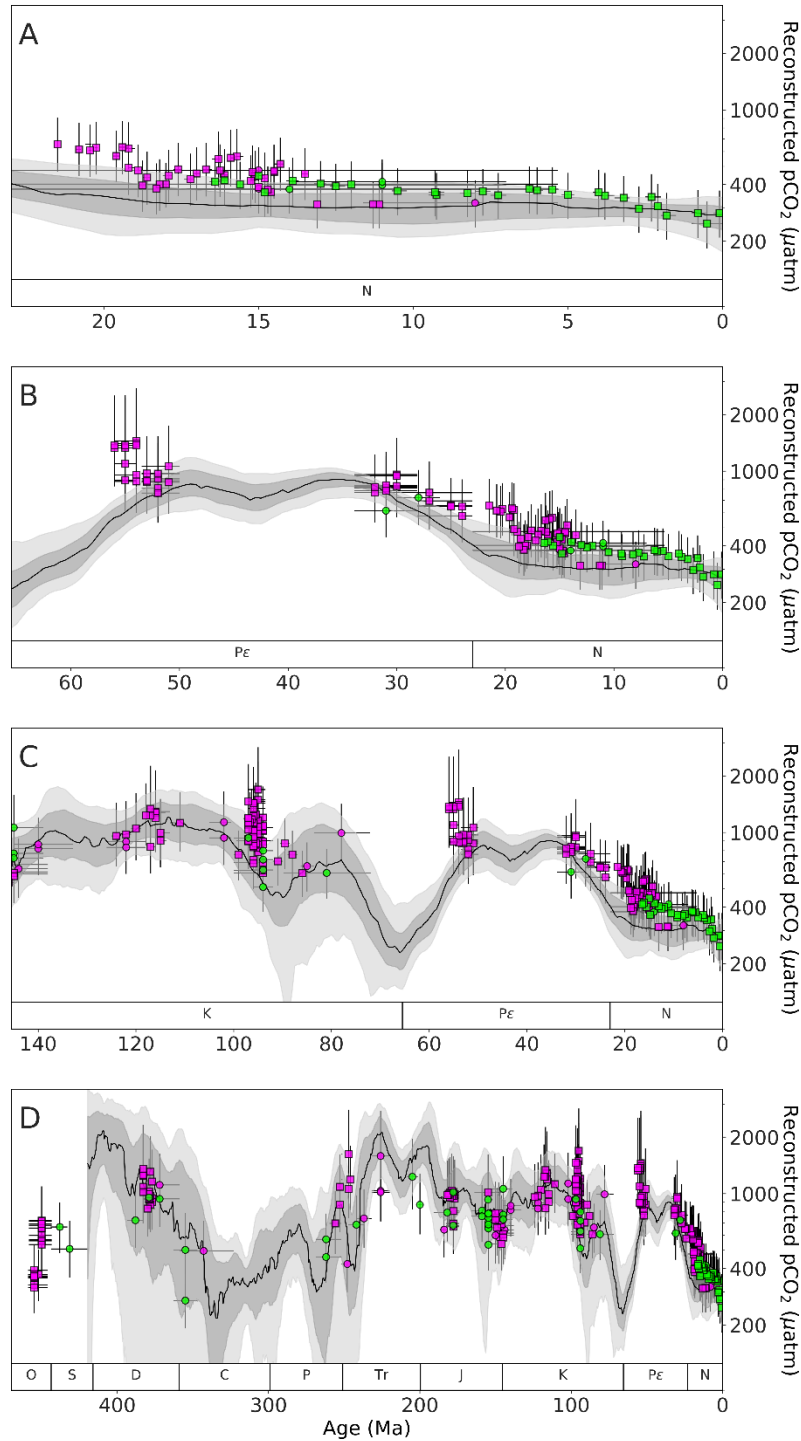

**Fig. S4.  $p\text{CO}_2$  from phytane over the Phanerozoic in time slices.**

Estimated  $p\text{CO}_2$  (on a log-scale) from literature (pink) and new data (blue), by sediment (square) and oil (circle). Horizontal error bars indicate age uncertainty. Vertical error bars indicate uncertainty in estimation. Foster et al. compilation of  $p\text{CO}_2$  proxies with LOESS fit (line) with 68 and 95% confidence intervals in gray and light gray plotted for comparison. A) Neogene, B) Paleogene, C) Cretaceous, and D) Phanerozoic.

**Table S1. Isotopic offset between biomass and phytol.**  $\delta^{13}\text{C}$  of bulk biomass and phytol for each individual laboratory cultured species;  $\Delta = \delta^{13}\text{C}$  offset between biomass and phytol; Genus refers to the cultured phytoplankton. The averages of each species are shown in Fig. S1.

| $\delta^{13}\text{C}$ Biomass | $\delta^{13}\text{C}$ Phytol | $\Delta$ | Genus                             | Reference               |
|-------------------------------|------------------------------|----------|-----------------------------------|-------------------------|
| -30.6                         | -36.5                        | 5.9      | <i>Synechocystis</i>              | Sakata et al., 1997     |
| -31.5                         | -38.4                        | 7.0      | <i>Synechocystis</i>              | Sakata et al., 1997     |
| -31.2                         | -37.0                        | 5.8      | <i>Synechocystis</i>              | Sakata et al., 1997     |
| -16.9                         | -18.2                        | 1.3      | <i>Emiliana huxleyi</i>           | Riebesell et al., 2000  |
| -17.3                         | -19.4                        | 2.1      | <i>Emiliana huxleyi</i>           | Riebesell et al., 2000  |
| -17.7                         | -20.3                        | 2.6      | <i>Emiliana huxleyi</i>           | Riebesell et al., 2000  |
| -17.7                         | -20.2                        | 2.5      | <i>Emiliana huxleyi</i>           | Riebesell et al., 2000  |
| -19.1                         | -21.1                        | 2.0      | <i>Emiliana huxleyi</i>           | Riebesell et al., 2000  |
| -21.2                         | -23.1                        | 1.9      | <i>Emiliana huxleyi</i>           | Riebesell et al., 2000  |
| -21.4                         | -23.3                        | 1.9      | <i>Emiliana huxleyi</i>           | Riebesell et al., 2000  |
| -22.0                         | -23.7                        | 1.7      | <i>Emiliana huxleyi</i>           | Riebesell et al., 2000  |
| -24.4                         | -25.9                        | 1.5      | <i>Emiliana huxleyi</i>           | Riebesell et al., 2000  |
| -26.6                         | -28.9                        | 2.3      | <i>Emiliana huxleyi</i>           | Riebesell et al., 2000  |
| -12.1                         | -16.3                        | 4.2      | <i>Rhodomonas sp.</i>             | van Dongen et al., 2002 |
| -17.5                         | -20.3                        | 2.8      | <i>Phaeocystis sp.</i>            | van Dongen et al., 2002 |
| -25.6                         | -31.2                        | 5.6      | <i>Spagnum cuspidatum</i>         | van Dongen et al., 2002 |
| -13.8                         | -14.8                        | 1.0      | <i>Isochrysis galbana</i>         | van Dongen et al., 2002 |
| -15.7                         | -20.6                        | 4.9      | <i>Isochrysis galbana</i>         | Schouten et al., 1998   |
| -41.0                         | -44.4                        | 3.4      | <i>Scenedesmus communis</i>       | Schouten et al., 1998   |
|                               |                              |          | <i>Tetraedron minimum</i>         | Schouten et al., 1998   |
| -49.5                         | -52.3                        | 2.8      | (batch)                           |                         |
| -32.6                         | -37.2                        | 4.6      | <i>Tetraedron minimum (cont)</i>  | Schouten et al., 1998   |
| -43.9                         | -46.1                        | 2.2      | <i>Chlamydomonas monoica</i>      | Schouten et al., 1998   |
| -18.1                         | -22.3                        | 4.2      | <i>Rhizosolenia setigera</i>      | Schouten et al., 1998   |
| -17.7                         | -20.5                        | 2.8      | <i>Chaetoceros socialis</i>       | Schouten et al., 1998   |
| -14.2                         | -17.1                        | 2.9      | <i>Chrysochromulina polylepis</i> | Schouten et al., 1998   |
| -16.9                         | -21.1                        | 4.2      | <i>Tetraselmin sp.</i>            | Schouten et al., 1998   |
| -22.8                         | -26.2                        | 3.4      | <i>Dunaliella sp.</i>             | Schouten et al., 1998   |
| -15.4                         | -20.4                        | 5.0      | <i>Rhodomonas sp.</i>             | Schouten et al., 1998   |
| -19.8                         | -23.0                        | 3.2      | <i>Gyrosigma sp.</i>              | Oakes et al., 2005      |
| -21.4                         | -25.9                        | 4.5      | <i>Gyrosigma sp.</i>              | Oakes et al., 2005      |
| -21.5                         | -23.6                        | 2.1      | <i>Gyrosigma sp.</i>              | Oakes et al., 2005      |
| -20.2                         | -24.6                        | 4.4      | <i>Gyrosigma sp.</i>              | Oakes et al., 2005      |
| -23.9                         | -26.8                        | 2.9      | <i>Gyrosigma sp.</i>              | Oakes et al., 2005      |
| -19.4                         | -23.7                        | 4.3      | <i>Gyrosigma sp.</i>              | Oakes et al., 2005      |
| -22.1                         | -31.1                        | 9.0      | <i>Gyrosigma sp.</i>              | Oakes et al., 2005      |
| -22.0                         | -25.3                        | 3.3      | <i>Gyrosigma sp.</i>              | Oakes et al., 2005      |
| -22.8                         | -28.7                        | 5.9      | <i>Gyrosigma sp.</i>              | Oakes et al., 2005      |
| -22.1                         | -22.6                        | 0.5      | <i>Gyrosigma sp.</i>              | Oakes et al., 2005      |
| -27.2                         | -27.8                        | 0.7      | <i>Gyrosigma sp.</i>              | Oakes et al., 2005      |
| -27.6                         | -26.3                        | -1.3     | <i>Gyrosigma sp.</i>              | Oakes et al., 2005      |
| -23.7                         | -25.1                        | 1.4      | <i>Gyrosigma sp.</i>              | Oakes et al., 2005      |
| -23.5                         | -24.6                        | 1.1      | <i>Gyrosigma sp.</i>              | Oakes et al., 2005      |
| -22.4                         | -26.0                        | 3.6      | <i>Gyrosigma sp.</i>              | Oakes et al., 2005      |

|       |       |      |                               |                     |
|-------|-------|------|-------------------------------|---------------------|
| -19.6 | -27.2 | 7.6  | <i>Nitzschia closterium</i>   | Oakes et al., 2005  |
| -16.4 | -19.3 | 2.9  | <i>Nitzschia closterium</i>   | Oakes et al., 2005  |
| -20.1 | -27.0 | 6.9  | <i>Nitzschia closterium</i>   | Oakes et al., 2005  |
| -16.4 | -19.4 | 3.0  | <i>Nitzschia closterium</i>   | Oakes et al., 2005  |
| -20.3 | -27.8 | 7.5  | <i>Nitzschia closterium</i>   | Oakes et al., 2005  |
| -16.3 | -20.5 | 4.2  | <i>Nitzschia closterium</i>   | Oakes et al., 2005  |
| -16.0 | -19.6 | 3.6  | <i>Nitzschia closterium</i>   | Oakes et al., 2005  |
| -28.7 | -34.2 | 5.5  | <i>Nitzschia closterium</i>   | Oakes et al., 2005  |
| -21.9 | -23.9 | 2.0  | <i>Nitzschia closterium</i>   | Oakes et al., 2005  |
| -20.6 | -22.2 | 1.6  | <i>Nitzschia closterium</i>   | Oakes et al., 2005  |
| -16.2 | -19.3 | 3.1  | <i>Nitzschia closterium</i>   | Oakes et al., 2005  |
| -16.1 | -19.2 | 3.1  | <i>Nitzschia closterium</i>   | Oakes et al., 2005  |
| -17.0 | -20.5 | 3.5  | <i>Nitzschia closterium</i>   | Oakes et al., 2005  |
| -17.1 | -22.6 | 5.5  | <i>Nitzschia closterium</i>   | Oakes et al., 2005  |
| -31.8 | -36.4 | 4.6  | <i>Nitzschia closterium</i>   | Oakes et al., 2005  |
| -20.0 | -18.3 | -1.7 | <i>Nitzschia closterium</i>   | Oakes et al., 2005  |
| -20.2 | -18.7 | -1.5 | <i>Nitzschia closterium</i>   | Oakes et al., 2005  |
| -19.1 | -17.4 | -1.7 | <i>Nitzschia closterium</i>   | Oakes et al., 2005  |
| -21.2 | -18.7 | -2.5 | <i>Nitzschia closterium</i>   | Oakes et al., 2005  |
| -17.2 | -19.1 | 1.8  | <i>Nitzschia closterium</i>   | Oakes et al., 2005  |
| -23.1 | -29.1 | 6.0  | <i>Oscillatoria sp.</i>       | Oakes et al., 2005  |
| -25.9 | -26.5 | 0.6  | <i>Oscillatoria sp.</i>       | Oakes et al., 2005  |
| -26.8 | -33.0 | 6.2  | <i>Pleurosigma sp.</i>        | Oakes et al., 2005  |
| -27.8 | -31.7 | 3.8  | <i>Pleurosigma sp.</i>        | Oakes et al., 2005  |
| -20.3 | -23.9 | 3.6  | <i>Pleurosigma sp.</i>        | Oakes et al., 2005  |
| -24.6 | -22.9 | -1.6 | <i>Naviculoid sp. 2</i>       | Oakes et al., 2005  |
| -22.6 | -25.2 | 2.7  | <i>Naviculoid sp. 2</i>       | Oakes et al., 2005  |
| -25.9 | -26.8 | 0.9  | <i>Naviculoid sp. 2</i>       | Oakes et al., 2005  |
| -23.4 | -21.9 | -1.5 | <i>Naviculoid sp. 2</i>       | Oakes et al., 2005  |
| -23.1 | -23.5 | 0.5  | <i>Naviculoid sp. 2</i>       | Oakes et al., 2005  |
| -22.2 | -28.9 | 6.7  | <i>Naviculoid sp. 2</i>       | Oakes et al., 2005  |
| -24.7 | -27.2 | 2.5  | <i>Naviculoid sp. 1</i>       | Oakes et al., 2005  |
| -23.8 | -30.0 | 6.1  | <i>Naviculoid sp. 1</i>       | Oakes et al., 2005  |
| -25.5 | -30.3 | 4.8  | <i>Naviculoid sp. 1</i>       | Oakes et al., 2005  |
| -22.4 | -28.8 | 6.4  | <i>Naviculoid sp. 1</i>       | Oakes et al., 2005  |
| -25.9 | -33.3 | 7.3  | <i>Naviculoid sp. 1</i>       | Oakes et al., 2005  |
| -25.3 | -28.0 | 2.7  | <i>Bacillaria paxillifer</i>  | Oakes et al., 2005  |
| -21.6 | -27.4 | 5.8  | <i>Bacillaria paxillifer</i>  | Oakes et al., 2005  |
| -18.2 | -18.6 | 0.4  | <i>Nitzschia frustulum</i>    | Oakes et al., 2005  |
| -18.1 | -19.0 | 0.9  | <i>Nitzschia frustulum</i>    | Oakes et al., 2005  |
| -16.6 | -17.5 | 0.9  | <i>Nitzschia frustulum</i>    | Oakes et al., 2005  |
| -15.2 | -15.5 | 0.3  | <i>Nitzschia frustulum</i>    | Oakes et al., 2005  |
| -16.6 | -15.3 | -1.3 | <i>Nitzschia frustulum</i>    | Oakes et al., 2005  |
| -59.3 | -61.0 | 1.7  | <i>Alexandrium tamarensis</i> | Wilkes et al., 2017 |
| -54.5 | -52.0 | -2.5 | <i>Alexandrium tamarensis</i> | Wilkes et al., 2017 |
| -49.2 | -44.5 | -4.7 | <i>Alexandrium tamarensis</i> | Wilkes et al., 2017 |
| -46.6 | -44.4 | -2.2 | <i>Alexandrium tamarensis</i> | Wilkes et al., 2017 |
| -41.9 | -42.1 | 0.2  | <i>Alexandrium tamarensis</i> | Wilkes et al., 2017 |
| -36.6 | -37.0 | 0.4  | <i>Alexandrium tamarensis</i> | Wilkes et al., 2017 |

**Table S2. Estimating  $b$  from marine OM in modern-day oceans.** The  $\delta^{13}\text{C}$  of organic matter compiled to calculate  $b$  from modern marine sediments.

| Location (Reference)                | OM    | $\delta_a^*$ | SST°C <sup>†</sup> | SST°K  | $\epsilon_{b(a)}$ | $\delta_d$ | $\epsilon_p$ | SSS <sup>‡</sup> | $K_0$  | $\epsilon_f$ | CO <sub>2[aq]</sub> | pCO <sub>2</sub> | $b$ |
|-------------------------------------|-------|--------------|--------------------|--------|-------------------|------------|--------------|------------------|--------|--------------|---------------------|------------------|-----|
| Atlantic near Portugal (116)        | -22.3 | 0.50         | 16.2               | 289.2  | -9.99             | -10.49     | 12.1         | 37               | 0.0369 | 26.5         | 11.1                | 300              | 160 |
| Gironde, France (102)               | -20.5 | 0.50         | 15.2               | 288.2  | -10.11            | -10.61     | 10.1         | 37               | 0.0380 | 26.5         | 11.4                | 300              | 187 |
| Black Sea (99)                      | -23.0 | 0.50         | 15.4               | 288.4  | -10.09            | -10.59     | 12.7         | 23               | 0.0404 | 26.5         | 12.1                | 300              | 167 |
| Congo fan (115)                     | -19.8 | 0.50         | 27.2               | 300.2  | -8.74             | -9.24      | 10.8         | 37               | 0.0274 | 26.5         | 8.2                 | 300              | 129 |
| Amazon shelf (98, 112)              | -18.5 | 0.50         | 28.5               | 301.5  | -8.60             | -9.10      | 9.6          | 37               | 0.0265 | 26.5         | 8.0                 | 300              | 135 |
| Atlantic near Brazil (111)          | -20.0 | 0.50         | 26.5               | 299.5  | -8.82             | -9.32      | 10.9         | 37               | 0.0278 | 26.5         | 8.4                 | 300              | 130 |
| Arabian Sea (101)                   | -20.0 | 0.50         | 26.7               | 299.7  | -8.80             | -9.30      | 10.9         | 35               | 0.0279 | 26.5         | 8.4                 | 300              | 131 |
| NE Atlantic (110)                   | -19.9 | 0.50         | 13.3               | 286.3  | -10.34            | -10.84     | 9.2          | 37               | 0.0403 | 27.5         | 12.1                | 300              | 221 |
| St. Lawrence, Canada (114)          | -20.8 | 0.50         | 5.7                | 278.7  | -11.28            | -11.78     | 9.2          | 30               | 0.0539 | 26.5         | 16.2                | 300              | 280 |
| Gulf of Trieste, Canada (100)       | -21.0 | 0.50         | 17.0               | 290    | -9.90             | -10.40     | 10.8         | 37               | 0.0360 | 26.5         | 10.8                | 300              | 169 |
| Santa Barbara Basin (104)           | -21.3 | 0.50         | 14.8               | 287.83 | -10.16            | -10.66     | 10.9         | 37               | 0.0384 | 26.5         | 11.5                | 300              | 180 |
| E Australian shelf (103)            | -18.0 | 0.50         | 24.2               | 297.2  | -9.08             | -9.58      | 8.6          | 35               | 0.0298 | 26.5         | 8.9                 | 300              | 160 |
| Gulf of Mexico (105, 106, 109, 113) | -19.2 | 0.50         | 26.2               | 299.2  | -8.85             | -9.35      | 10.0         | 36               | 0.0282 | 26.5         | 8.5                 | 300              | 139 |

\* Averaged  $\delta^{13}\text{C}$  of planktonic foraminifera *G. ruber* (117, 118)

† Sea surface temperature derived from seatemperature.org

‡ Sea surface salinity derived from NASA PODAAC

**Table S3. Estimating  $b$  from phytol across an equatorial Pacific Ocean transect.** The  $\delta^{13}\text{C}$  of phytol (Ph) from modern marine sediments in the literature ( $I$ ) over a 500 km transect, shown by latitude (Lat) and depth (m) used in order to calculate  $b$ .

| Lat | m  | Ph    | $\delta_p$ | $\delta_a^*$ | SST $\dagger$ | $\epsilon_{b(a)}$ | $\delta_d$ | $\epsilon_p$ | SSS $\ddagger$ | $K_0$  | $\epsilon_r$ | aq | pCO $_2$ | $b$ |
|-----|----|-------|------------|--------------|---------------|-------------------|------------|--------------|----------------|--------|--------------|----|----------|-----|
| 3N  | 78 | -26.4 | -22.9      | 0.5          | 27            | -8.8              | -9.3       | 14           | 35             | 0.0277 | 26.5         | 8  | 300      | 104 |
| 2N  | 20 | -26.4 | -22.9      | 0.5          | 27            | -8.8              | -9.3       | 14           | 35             | 0.0277 | 26.5         | 8  | 300      | 104 |
| 2N  | 44 | -26.0 | -22.5      | 0.5          | 27            | -8.8              | -9.3       | 14           | 35             | 0.0277 | 26.5         | 8  | 300      | 108 |
| 1N  | 20 | -26.0 | -22.5      | 0.5          | 27            | -8.8              | -9.3       | 14           | 35             | 0.0277 | 26.5         | 8  | 300      | 108 |
| 1N  | 44 | -25.4 | -21.9      | 0.5          | 27            | -8.8              | -9.3       | 13           | 35             | 0.0277 | 26.5         | 8  | 300      | 113 |
| 0   | 15 | -26.7 | -23.2      | 0.5          | 27            | -8.8              | -9.3       | 14           | 35             | 0.0277 | 26.5         | 8  | 300      | 102 |
| 0   | 29 | -26.1 | -22.6      | 0.5          | 27            | -8.8              | -9.3       | 14           | 35             | 0.0277 | 26.5         | 8  | 300      | 107 |
| 2S  | 25 | -25.1 | -21.6      | 0.5          | 27            | -8.8              | -9.3       | 13           | 35             | 0.0277 | 26.5         | 8  | 300      | 115 |
| 2S  | 49 | -25.2 | -21.7      | 0.5          | 27            | -8.8              | -9.3       | 13           | 35             | 0.0277 | 26.5         | 8  | 300      | 115 |

\*Averaged  $\delta^{13}\text{C}$  of planktonic foraminifera *G. ruber* (117, 118)

$\dagger$ Sea surface temperature derived from seatemperature.org

$\ddagger$ Sea surface salinity derived from NASA PODAAC

**Code S1.** Python code used for Monte Carlo simulations to calculate uncertainty for  $PCO_2$  estimations by considering every parameter involved in the equations.

**Data S1.** All data used to reconstruct  $PCO_2$  from the  $\delta^{13}C_{\text{phytane}}$ .
